# Supplementary material
Source: ML conference proceedings conference paper supplement (https://openreview.net/forum?id=gfGLEtWAqV)
Supplement: supplementary_material [file neurips 2025 full version supp material.pdf › supp-materials/code/neurips 2025 full version supp material.pdf]

---

# Improved Algorithms for Fair Matroid Submodular Maximization (full version)

---

Anonymous Author(s)

Affiliation

Address

email

## Abstract

Submodular maximization subject to matroid constraints is a central problem with many applications in machine learning. As algorithms are increasingly used in decision-making over datapoints with sensitive attributes such as gender or race, it is becoming crucial to enforce fairness to avoid bias and discrimination. Recent work has addressed the challenge of developing efficient approximation algorithms for fair matroid submodular maximization. However, the best algorithms known so far are only guaranteed to satisfy a relaxed version of the fairness constraints that loses a factor 2, i.e., the problem may ask for  $\ell$  elements with a given attribute, but the algorithm is only guaranteed to find  $\lfloor \ell/2 \rfloor$ . In particular, there is no provable guarantee when  $\ell = 1$ , which corresponds to a key special case of perfect matching constraints.

In this work, we achieve a new trade-off via an algorithm that gets arbitrarily close to full fairness. Namely, for any constant  $\varepsilon > 0$ , we give a constant-factor approximation to fair monotone matroid submodular maximization that in expectation loses only a factor  $(1 - \varepsilon)$  in the lower-bound fairness constraint. Our empirical evaluation on a standard suite of real-world datasets – including clustering, recommendation, and coverage tasks – demonstrates the practical effectiveness of our methods.

## 1 Introduction

Machine learning is increasingly deployed in high-stakes decision-making, raising concerns about the propagation of bias and unfairness in automated systems. These challenges are especially acute in domains such as education, law enforcement, hiring, and credit [MMD16; Whi22; Eur22]. In response, a growing body of research has focused on developing algorithms that incorporate fairness constraints for core problems including clustering [CKLV17], data summarization [CKSDKV18], classification [ZVGG17], voting [CHV18], and ranking [CSV18].

This paper studies fairness in the context of monotone submodular maximization subject to matroid constraints. Submodular functions, which capture the principle of diminishing returns, are fundamental to a range of machine learning applications such as recommender systems [EG11], feature selection [DK11], active learning [GK11], and data summarization [LB11]. Matroids provide a general framework for modeling independence constraints, encompassing cardinality, partition, graph connectivity, and linear independence constraints.

While numerous fairness definitions have been proposed, we adopt a widely used group fairness model [CHV18; CKSDKV18; CSV18; CKLV17; CKLV19; EMNTT20; EFNTT23; ETNV24], which partitions the universe into *disjoint* groups and enforces *lower and upper* bounds on the representation

of each sensitive group in the selected set. See Section 2.1 for a precise definition. This model generalizes several fairness notions, such as proportional representation [Mon95; BLS17], diversity constraints [CCRL13; Bid06], and statistical parity [DHPRZ12].

In the absence of fairness constraints, monotone submodular maximization under a single matroid constraint is very well understood, as a tight  $(1 - 1/e) \approx 0.63$ -approximation is achievable [CCPV11; Fei98]. The intersection of two matroid constraints (which we refer to as “matroid intersection”) admits an almost 0.5-approximation [LSV10]. The fair variant has been primarily explored under cardinality constraints [CHV18], where a tight  $(1 - 1/e)$ -approximation is also known. In the (single-pass) streaming setting, there is a 0.3178-approximation [FLNSZ22] for the non-fair matroid version; furthermore, since the intersection of cardinality constraint and fairness can be reduced to a single matroid constraint [EMNTT20], the same approximation factor can be obtained for it.

However, the intersection of a matroid constraint and a fairness constraint seems significantly more challenging, and is still poorly understood despite two recent works devoted to studying this problem in the streaming [EFNTT23] and the classic offline [ETNV24] settings; our focus is on the latter. Following [EFNTT23], we refer to the problem as Fair Matroid Monotone Submodular Maximization (FMMSM). To appreciate its difficulty, consider a key special case, Monotone Submodular Perfect Matching (MSPM), i.e., maximizing a monotone submodular function over the collection of all *perfect matchings* in a *bipartite graph*  $(V_G, E_G)$ .<sup>1</sup> This collection of feasible sets is not downward-closed, which invalidates known algorithmic approaches.<sup>2</sup> The best known approximation factor for MSPM is a trivial  $O(|V_G|)$ -approximation; one can also apply the framework of [GHIM09] to obtain an  $\tilde{O}(\sqrt{|E_G|})$ -approximation<sup>3</sup>, which is superior for sparse graphs. In fact, this could possibly even be tight, as it almost matches a surprising negative result of [ETNV24] who showed a family of sparse graphs where the standard *multilinear relaxation* (commonly used in relax-and-round approaches for submodular optimization) has an integrality gap of  $\Omega(\sqrt{|E_G|})$ . The existence of a constant-factor approximation to MSPM was posed by [ETNV24] as an exciting open problem.

The algorithms given in [EFNTT23; ETNV24] for FMMSM circumvent the difficulty posed by the lower bound constraints by relaxing them. They obtain the following two results:

**Theorem 1.1 (Two-pass algorithm of [EFNTT23])** *There is a polynomial-time algorithm for FMMSM that violates lower bound constraints by a factor 2 and obtains  $\alpha/2$ -approximation, where  $\alpha$  is the approximation ratio of an algorithm for maximizing a monotone submodular function under a matroid intersection constraint.*

We can have  $\alpha$  be almost  $1/2$  [LSV10] and thus get an almost  $1/4$ -approximation. ([EFNTT23] work in the streaming setting and instead use the streaming algorithm for matroid intersection of [GJS21]; this results in a  $1/11.66$ -approximation in two passes.) Here, violating lower bound constraints by a factor 2 means that, if a color has a lower bound of  $\ell$ , the solution is guaranteed to have at least  $\lfloor \ell/2 \rfloor$  elements of that color. Note that in MSPM we have  $\ell = 1$  and thus  $\lfloor \ell/2 \rfloor = 0$ .

**Theorem 1.2 ([ETNV24])** *There is a polynomial-time algorithm for FMMSM that satisfies lower and upper bound constraints in expectation rather than exactly, and obtains a  $(1 - 1/e)$ -approximation in expectation.*

Theorem 1.2 also guarantees certain two-sided tail bounds on the violation of each fairness constraint which apply if  $\ell$  is large enough. It is the only algorithm considered in this paper that violates the *upper* bounds. The algorithm proceeds by solving and rounding the multilinear relaxation.

<sup>1</sup>To see why MSPM is a special case of FMMSM, set  $E_G$  as the universe, consider a partition matroid that encodes that every vertex on the left shall have degree at most 1 in the solution, and set fairness constraints so that every vertex on the right shall have degree at least 1 and at most 1.

<sup>2</sup>Of course, a proper subset of a perfect matching is not a perfect matching. But more importantly, the collection of all *subsets of perfect matchings* (which is downward-closed) does not belong to any of the families that are known to make approximate submodular maximization tractable. In particular, it is not a matroid, an intersection of a small number of matroids, or a so-called  $p$ -extendible set system or a  $p$ -system [CCPV11] for  $p = O(1)$ .

<sup>3</sup>The work [GHIM09] shows that we can in polynomial time obtain numbers  $c_e$  for  $e \in E_G$  such that for any  $S \subseteq E_G$ , the function  $\hat{f}(S) := \sqrt{\sum_{e \in S} c_e}$  is an  $\tilde{O}(\sqrt{|E_G|})$ -approximation to  $f(S)$ . Maximizing  $\hat{f}(S)$  amounts to maximizing  $\sum_{e \in S} c_e$ , which is the (polytime-solvable) maximum-weight bipartite perfect matching problem.

77 If we consider a relaxed version of MSPM where instead of a *perfect* matching we want a *large*  
78 matching that also has high submodular function value, then a simple greedy algorithm will yield  
79 a  $1/3$ -approximation (Theorem 2.6) and construct a maximal matching, thus getting  $1/2$  of the  
80 maximum possible size. The results in Theorems 1.1 and 1.2 give no improvement upon this. While  
81 one can try to generalize this simple approach to FMMSM, it faces another issue that is salient in the  
82 context of fairness motivations: while at least half of the total lower bound mass will be satisfied,  
83 there could be “unlucky” colors (marginalized groups) that never get represented in the solution; this  
84 is precisely the reason why we seek fair algorithms in the first place.

## 85 1.1 Our contributions

86 In this work we provide an algorithm that satisfies the fairness constraints within a factor better  
87 than 2, while also giving guarantees for every individual group rather than only in aggregate. To  
88 achieve the former objective, we trade off part of the objective value; to achieve the latter, we employ  
89 randomization.

90 **Theorem 1.3 (informal version of Theorem 3.4)** *For every  $\varepsilon \in (0, 1)$  there is a polynomial-time*  
91 *algorithm for FMMSM whose output*

- 92 • *satisfies the matroid constraint,*
- 93 • *satisfies fairness upper bound constraints,*
- 94 • *for a group with fairness lower bound  $\ell$ , has in expectation at least  $(1 - \varepsilon)\ell$  elements from*  
95 *that group,*
- 96 • *has expected size at least  $(1 - \varepsilon)$  times the maximum size of any feasible solution,*
- 97 • *satisfies Chernoff-style high-probability bounds on size, as well as total fairness violation,*
- 98 • *has expected submodular function value at least  $0.499 \cdot \varepsilon \cdot \text{OPT}$ .*

99 Our bound on the submodular function value is actually shown with respect to a more powerful  
100 optimum, namely, an optimal set that satisfies the matroid and upper-bound constraints, but not  
101 necessarily the lower-bound constraints. If one wants to compare to this optimum, then the  $O(\varepsilon)$   
102 factor loss in value is unavoidable. To see this, consider MSPM in a graph  $P_3 \times N$  consisting of a  
103 disjoint union of  $N$  paths of length 3, with a linear objective function assigning values 0, 1, 0 to each  
104 path’s edges. A perfect matching of size  $2N$  has 0 value, and a maximal matching of size  $N$  has  
105 value  $N$ ; one can interpolate between these smoothly.

106 As a second contribution, we also employ our techniques to obtain a deterministic algorithm. There are  
107 several variants that we could formulate; we choose to show a general setting of matroid intersection,  
108 where the trade-off is between size and objective value. The relation to fairness is that an algorithm  
109 that finds a solution of maximum size that is an  $\alpha$ -approximation to the objective value would imply  
110 an  $\alpha$ -approximation algorithm for FMMSM (see [EFNTT23], Proposition C.6).

111 **Theorem 1.4 (informal version of Theorem 3.6)** *For every  $\varepsilon \in (0, 1)$  there is a deterministic*  
112 *polynomial-time algorithm for the problem of maximizing a monotone submodular function subject to*  
113 *two matroid constraints whose output has size at least  $(1 - \varepsilon)$  times the maximum size of any feasible*  
114 *solution minus one, and obtains a  $(0.499 \cdot \varepsilon)$ -approximation to the submodular function value.*

115 **Experimental results.** We show the effectiveness of our algorithm empirically against prior work  
116 and natural baselines on a suite of standard benchmarks. We measure the submodular objective  
117 value and total fairness violation. Our algorithms produce solutions whose value is competitive with  
118 the highest-value baseline, which completely ignores the lower bound constraints and accordingly  
119 has the highest fairness violations. In two out of three scenarios, our algorithms dominate prior  
120 work [EFNTT23]. Finally, a key strength of our approach is the flexibility given by  $\varepsilon$ , allowing users  
121 to tune the balance between utility and fairness.

122 **Our techniques.** Let us begin with the simple setting of perfect matchings (MSPM). Consider the  
123 symmetric difference of a high-value matching  $Y$  and a perfect matching  $P$  (where  $Y$  might be small

124 and  $P$  might have no value). This decomposes into a collection of vertex-disjoint alternating cycles  
 125 and augmenting paths.

126 One possible algorithm is to ignore the cycles, and choose some of the augmenting paths to apply to  $Y$ ,  
 127 so that its size grows to at least  $(1 - \varepsilon)|P|$ . We can do this by computing the marginal contribution of  
 128 the elements that  $Y$  would lose in each path, and taking the least damaging paths; by submodularity,  
 129 this loses at most a  $(1 - \varepsilon)$  fraction of value in  $Y$ .

130 While this does ensure a large matching, some  $\varepsilon$  fraction of vertices can still be “unlucky” and end  
 131 up unmatched. Deterministically this would be hard to avoid (short of solving MSPM/FMMSM  
 132 completely, with no fairness violation); our next idea is to choose the paths randomly in the above  
 133 solution. This will work for MSPM, as long as we take care to select a  $(1 - \varepsilon)$  fraction of the  $|P| - |Y|$   
 134 many augmenting paths, even if we already have  $|Y| \geq (1 - \varepsilon)|P|$ . Then every vertex that was not  
 135 matched in  $Y$  has a  $(1 - \varepsilon)$  probability of being matched in the new solution.

136 However, there are two main challenges when trying to generalize the above approach to matroid  
 137 and fairness constraints. Firstly, having fairness bounds with  $\ell_c < u_c$  means that  $Y$  can have fewer  
 138 elements than  $P$  in some colors but more elements in other colors, and can even have  $|Y| = |P|$   
 139 while still violating many fairness lower bounds. This means that we need to find and apply not only  
 140 augmenting paths, but also alternating paths that exchange an element of an oversaturated color for  
 141 one of an undersaturated color, without increasing the solution size. We show that as long as the total  
 142 fairness violation is large, there are many such disjoint paths, which implies that applying a random  
 143 fraction of them still retains enough value.

144 The second, larger obstacle arises due to dealing with general matroids. We are able to use tools  
 145 from matroid theory to show the existence of many disjoint alternating or augmenting paths in an  
 146 appropriate matroid intersection exchange graph whose vertices correspond to elements of  $Y$  and  $P$   
 147 (which were edges in the case of MSPM). We need to carefully refine the paths via an asymmetric  
 148 shortcutting process to ensure that applying them leaves the solution independent in the matroid while  
 149 also not disrupting the counts of elements in the colors not being exchanged. Moreover, in general,  
 150 multiple augmenting paths in matroids cannot be applied simultaneously. We deal with this using an  
 151 iterative framework where we apply a single path, rebuild the exchange graph, and find a new large  
 152 collection of disjoint paths; we then bound the loss in value after each step.

153 **Paper organization.** We discuss more related work in Section 1.2. In Section 2 we introduce all  
 154 necessary notation, definitions, and useful facts. In Section 3 we describe our algorithms and prove  
 155 their properties. Section 4 is devoted to the experimental evaluation. We conclude and discuss the  
 156 limitations and broader impact of our work in Section 5.

## 157 1.2 Additional related work

158 The *non-monotone* Fair Matroid Submodular Maximization problem was explored by [YT23] under  
 159 the cardinality constraint. They achieved a 0.2005-approximation for the special case where for all  
 160 colors  $c$ , we have  $\ell_c/|V_c| = a$  and  $u_c/|V_c| = b$  for some constants  $a, b \in [0, 1]$ . Later, [ETNV24]  
 161 recovered and further generalized their results. In particular for general matroids, they achieved a  
 162  $(1 - \beta)/(8 + \varepsilon)$  approximation algorithm that guarantees the number of elements from each group  $c$   
 163 is between  $\lfloor \beta \ell_c \rfloor$  and  $u_c$  for a trade-off parameter  $\beta \in [0, 1/2]$ .

164 In this work, we consider the setting where the color groups are disjoint. The more general case,  
 165 where groups may overlap, was previously studied by [CHV18] for the special case of FMMSM  
 166 with a cardinality constraint. They show that when elements can belong to three or more groups,  
 167 simply checking the feasibility becomes NP-hard. However, by allowing for violations of the  
 168 fairness constraints and in particular guaranteeing the fairness constraint in expectation, they gave a  
 169  $(1 - 1/e - o(1))$ -approximation algorithm for the problem.

170 An alternative notion of fairness in submodular maximization has been explored in [TWRTZ19;  
 171 TY23; WLBW24], where the focus is on ensuring that each group – potentially not limited to subsets  
 172 of the ground set  $V$  – receives at least a specified amount of value from the selected solution. In these  
 173 formulations, the value is modeled using a monotone submodular function. This line of work can be  
 174 cast as a multi-objective submodular maximization problem [KMGG08; CVZ10; Udw18].

## 2 Preliminaries

We denote the symmetric difference  $(X \setminus Y) \cup (Y \setminus X)$  of two sets  $X$  and  $Y$  by  $X \Delta Y$ .

**Submodular functions.** We consider functions  $f : 2^V \rightarrow \mathbb{R}_+$  defined on a ground set  $V$ . We say that  $f$  is *submodular* if  $f(Y \cup \{e\}) - f(Y) \geq f(X \cup \{e\}) - f(X)$  for any two sets  $Y \subseteq X \subseteq V$  and any element  $e \in V \setminus X$ . Moreover,  $f$  is *monotone* if  $f(Y) \leq f(X)$  for any two sets  $Y \subseteq X \subseteq V$ . We assume that  $f$  is given as an oracle that computes  $f(S)$  for given  $S \subseteq V$ ; we consider the running time of this oracle to be  $O(1)$ .

The following fact is folklore. We provide a proof for completeness.

**Fact 2.1** *Let  $f$  be a non-negative submodular function and  $X_1, X_2, \dots, X_k \subseteq X$  be disjoint subsets of  $X$ . Then*

$$\sum_{i=1}^k f(X \setminus X_i) \geq (k-1)f(X).$$

*Proof.* We use induction on  $k$ . The base case  $k = 1$ , i.e., that  $f(X \setminus X_1) \geq 0$ , follows because  $f \geq 0$ . For  $k > 1$ , we apply the inductive hypothesis to the set family  $X_1 \cup X_2, X_3, X_4, \dots, X_k$ . We get

$$f(X \setminus (X_1 \cup X_2)) + \sum_{i=3}^k f(X \setminus X_i) \geq (k-2)f(X).$$

By submodularity,

$$f(X \setminus X_1) + f(X \setminus X_2) - f(X \setminus (X_1 \cup X_2)) \geq f(X).$$

Adding these two inequalities gives the statement.  $\square$

**Matroids.** A *matroid* is a set family  $\mathcal{I} \subseteq 2^V$  with the properties:

- *Downward-closedness:* if  $X \subseteq Y$  and  $Y \in \mathcal{I}$ , then  $X \in \mathcal{I}$ ;
- *Augmentation:* if  $X, Y \in \mathcal{I}$  and  $|X| < |Y|$ , then there exists  $e \in Y$  with  $X + e \in \mathcal{I}$ .

We abbreviate  $X \cup \{e\}$  as  $X + e$  and  $X \setminus \{e\}$  as  $X - e$ . We assume that the matroid is given as an oracle that, for a given  $S \subseteq V$ , answers whether  $S \in \mathcal{I}$ ; we consider the running time of this oracle to be  $O(1)$ . We say that a set  $S \subseteq V$  is *independent* if  $S \in \mathcal{I}$ .

**Matroid exchange graph.** Let  $\mathcal{I}$  be a matroid on universe  $V$  and  $Y, Z$  be two independent sets.

**Definition 2.2** *We define the exchange graph for  $Y$  and  $Z$  with respect to  $\mathcal{I}$  as the bipartite graph*

$$(Y \setminus Z, Z \setminus Y, \{(y, z) : Y - y + z \in \mathcal{I}\}).$$

**Lemma 2.3 ([Sch03a], Corollary 39.12a)** *If  $|Y| = |Z|$ , then the exchange graph for  $Y$  and  $Z$  with respect to  $\mathcal{I}$  contains a perfect matching.*

**Lemma 2.4 ([Sch03a], Corollary 39.13)** *Let  $Y$  be an independent set and let  $Z \subseteq V$  be such that  $|Z| = |Y|$ . If the exchange graph for  $Y$  and  $Z$  with respect to  $\mathcal{I}$  contains a unique perfect matching between  $Y \setminus Z$  and  $Z \setminus Y$ , then  $Z$  is also an independent set.*

### 2.1 Fair Matroid Monotone Submodular Maximization (FMMSM)

The universe  $V$  is partitioned into  $C$  sets:  $V = V_1 \cup V_2 \cup \dots \cup V_C$ , where  $V_c$  denotes elements of color  $c$ . Every element has exactly one color. The set of colors is denoted by  $[C] = \{1, 2, \dots, C\}$ . For every color  $c \in [C]$  we have *fairness bounds*: lower bound  $\ell_c$  and upper bound  $u_c$ .

The set of upper bounds gives rise to a *partition matroid* that we will denote by  $\mathcal{U}$ . That is,

$$\mathcal{U} = \{S \subseteq V \mid |S \cap V_c| \leq u_c \ \forall c \in [C]\}.$$

207 It is well-known that such a collection of sets forms a matroid. We will call a set  $S \in \mathcal{U}$  *upper-fair*.  
 208 If a set satisfies both the lower and the upper bounds, we say that it is *fair*. That is, we define the  
 209 family of fair sets  $\mathcal{C}$  as follows:

$$\mathcal{C} = \{S \subseteq V \mid \ell_c \leq |S \cap V_c| \leq u_c \ \forall c \in [C]\}.$$

210 The FMMSM problem asks to find a set  $S \in \mathcal{I} \cap \mathcal{C}$  (i.e., fair and independent  $S$ ) that maximizes  $f(S)$ .  
 211 We use  $\text{OPT}$  for the optimal value, i.e.,  $\text{OPT} = \max_{S \in \mathcal{I} \cap \mathcal{C}} f(S)$ . We assume that there exists a fair  
 212 and independent set, i.e.,  $\mathcal{I} \cap \mathcal{C} \neq \emptyset$ . We say that an algorithm is an  $\alpha$ -approximation if it outputs a  
 213 set  $S$  with  $f(S) \geq \alpha \cdot \text{OPT}$ .

214 For any set  $S \subseteq V$  we define its *fairness violation*  $\text{fav}(S) := \sum_c \max\{|S \cap V_c| - u_c, \ell_c - |S \cap V_c|, 0\}$ .  
 215 Note that if  $S$  is upper-fair, then  $\text{fav}(S) = \sum_c \max\{\ell_c - |S \cap V_c|, 0\}$ .

216 **Lemma 2.5 ([EFNTT23], Appendix C)** *There is an exact polynomial-time algorithm for FMMSM*  
 217 *for the case when  $f$  is a linear function.*

218 **Matroid intersection.** Given two matroids and a monotone submodular function  $f$  defined on  $V$ ,  
 219 we can define the problem of maximizing a submodular function subject to a matroid intersection  
 220 constraint similarly to FMMSM.

221 In particular, if we ignore the lower bounds completely, FMMSM turns into the above matroid  
 222 intersection problem for matroids  $\mathcal{I}$  and  $\mathcal{U}$ .

223 **Theorem 2.6 ([CCPV11])** *The greedy algorithm gives a  $1/3$ -approximation to this problem.*

224 **Theorem 2.7 ([LSV10])** *For any  $\delta > 0$  there is a polynomial-time algorithm that gives a  $(0.5 - \delta)$ -*  
 225 *approximation to this problem.*

### 226 3 Our algorithm

227 In this section we describe our algorithms: randomized (Theorem 3.4) and deterministic (Section 3.1,  
 228 Theorem 3.6). We first need to introduce some notions.

229 The proof of Theorem 3.4 will begin by constructing a maximum-cardinality independent and fair  
 230 set  $P$ , which will stay unchanged throughout the execution. We also construct an independent and  
 231 upper-fair set  $Y$  of high  $f$ -value. We will use  $P$  as a source of fairness and iteratively trade off  $Y$ 's  
 232 value for  $P$ 's elements in colors that are undersaturated by  $Y$ .

233 **Definition 3.1** *Given  $Y$  and  $P$  as above, we say that a color  $c \in [C]$  is undersaturated if  $|Y \cap V_c| <$   
 234  $|P \cap V_c|$ , and oversaturated if  $|Y \cap V_c| > |P \cap V_c|$ .*

235 The technical crux of the proof of Theorem 3.4 is Lemma 3.3, in which we show the existence of  
 236 many disjoint structures, each of which can be used to advance our fairness objective. We will call  
 237 them augmenting or alternating, as they indeed correspond to such paths in the appropriately defined  
 238 matroid intersection exchange graph that we consider in the proof of Lemma 3.3.

239 **Definition 3.2** *Let  $Y$  be an independent and upper-fair set, and let  $X \subseteq V$ . Define the result  $Y'$  of*  
 240 *applying  $X$  to  $Y$  as the symmetric difference  $Y' = Y \triangle X$ . We say that  $X$  is alternating (with respect*  
 241 *to  $Y$ ) if  $Y'$  is independent ( $Y' \in \mathcal{I}$ ) and there is exactly one undersaturated color  $c' \in [C]$  and one*  
 242 *oversaturated color  $c'' \in [C]$  such that for all  $c \in [C]$ ,*

$$|Y' \cap V_c| = |Y \cap V_c| + \begin{cases} 1 & \text{for } c = c', \\ -1 & \text{for } c = c'', \\ 0 & \text{for } c \neq c', c''. \end{cases}$$

243 *We say that  $X$  is augmenting if all the above conditions are satisfied, except that there is no color  $c''$ .*

244 *In both cases, we say that  $X$  increases  $c'$ .*

245 Note that we have  $|Y'| = |Y|$  if  $X$  is alternating and  $|Y'| = |Y| + 1$  if  $X$  is augmenting. Also,  $Y'$  is  
 246 upper-fair, since the only color where it has more elements than  $Y$  is  $c'$ , and we have  $|Y' \cap V_{c'}| =$   
 247  $|Y \cap V_{c'}| + 1 < |P \cap V_{c'}| + 1$  (and  $P$  is fair).

248 **Lemma 3.3** *Let  $Y$  and  $P$  be two independent and upper-fair sets with  $|Y| \leq |P|$ . Denote*

$$k = \sum_{c \in [C]} \max(0, |P \cap V_c| - |Y \cap V_c|).$$

249 *Then we may find in polynomial time a collection  $X_1, \dots, X_k$  of disjoint subsets of  $Y \cup P$ , of which at*  
 250 *least  $|P| - |Y|$  many are augmenting and the rest are alternating. Moreover, for every undersaturated*  
 251 *color  $c$ , exactly  $|P \cap V_c| - |Y \cap V_c|$  many of the paths increase  $c$ .*

252 *Proof.* To simplify notation, we assume without loss of generality that  $Y \cap P = \emptyset$ . Otherwise we  
 253 could work with sets  $Y \setminus P$  and  $P \setminus Y$ .

254 Consider the matroid intersection exchange graph for  $Y$  and  $P$  with respect to matroids  $\mathcal{I}$  and  $\mathcal{U}$ .  
 255 This is defined as the *directed* bipartite graph obtained by taking the union of the exchange graph for  
 256  $Y$  and  $P$  with respect to  $\mathcal{I}$ , whose edges we direct right-to-left (from  $P$  to  $Y$ ), and of the exchange  
 257 graph for  $Y$  and  $P$  with respect to  $\mathcal{U}$ , whose edges we direct left-to-right (from  $Y$  to  $P$ ). That is, we  
 258 have edges

$$\{y \rightarrow p : Y + p - y \in \mathcal{U}\} \quad \text{and} \quad \{y \leftarrow p : Y + p - y \in \mathcal{I}\}.$$

259 Inside this graph we will carefully construct a subgraph consisting of two matchings  $M_{\rightarrow}$  (directed  
 260 left-to-right) and  $M_{\leftarrow}$  (directed right-to-left). The augmenting and alternating paths will be found in  
 261 that subgraph.

262 To construct  $M_{\leftarrow}$ , we first define  $T_P := \{p \in P : Y + p \in \mathcal{I}\}$ . We have  $|T_P| \geq |P| - |Y|$  (by  
 263 repeated application of the matroid augmentation property). We will call the elements in  $T_P$  *P-sinks*.  
 264 Let  $T'_P$  be an arbitrary subset of  $T_P$  of size exactly  $|P| - |Y|$ . We then invoke Lemma 2.3 on the  
 265 exchange graph for  $Y$  and  $P \setminus T'_P$  with respect to  $\mathcal{I}$  (which is a subgraph of our matroid intersection  
 266 exchange graph). It implies the existence of a perfect matching between  $Y$  and  $P \setminus T'_P$ ; since one  
 267 exists, we can find one in polynomial time. We obtain the matching  $M_{\leftarrow}$  by removing the edges of  
 268 that matching that are incident to  $T_P \setminus T'_P$ . Then,  $M_{\leftarrow}$  matches every vertex of  $P \setminus T_P$ .

269 We construct the matching  $M_{\rightarrow}$  manually by matching up as many elements of the same color  
 270 between  $Y$  and  $P$  as possible. That is, for every color  $c \in [C]$  we add  $\min(|Y \cap V_c|, |P \cap V_c|)$  edges  
 271 from  $Y \cap V_c$  to  $P \cap V_c$  to the matching  $M_{\rightarrow}$ .

272 We define the set  $S$  of *sources* as all vertices in  $P$  that did not get matched in  $M_{\rightarrow}$ . Note that they  
 273 are only in undersaturated colors, and their number is exactly  $k$ . (In principle it is possible to have a  
 274 source that is also a  $P$ -sink; this can happen if  $Y$  is not maximal in  $\mathcal{I} \cap \mathcal{U}$ .)

275 We also define the set  $T_Y$  of *Y-sinks* as all vertices in  $Y$  that did not get matched in  $M_{\rightarrow}$ . Note that  
 276 they are only in oversaturated colors, and their number is exactly  $k - (|P| - |Y|)$ , as we have

$$\begin{aligned} |P| - |Y| &= \sum_{c \in [C]} |P \cap V_c| - |Y \cap V_c| \\ &= \sum_{c: \text{undersaturated}} (|P \cap V_c| - |Y \cap V_c|) - \sum_{c: \text{oversaturated}} (|Y \cap V_c| - |P \cap V_c|) \\ &= k - |T_Y|. \end{aligned}$$

277 To recap, we have  $k$  sources  $S$  (all in  $P$ ),  $k - (|P| - |Y|)$   $Y$ -sinks  $T_Y$ , and at least  $|P| - |Y|$   $P$ -sinks  
 278  $T_P$ . Moreover, for every undersaturated color  $c$ , exactly  $|P \cap V_c| - |Y \cap V_c|$  many of the sources are  
 279 of color  $c$ .

280 Now we show how to construct  $k$  vertex-disjoint simple paths in  $M_{\rightarrow} \cup M_{\leftarrow}$  that start at sources ( $S$ )  
 281 and end at sinks ( $T_Y \cup T_P$ ). For every path, we proceed as follows:

- 282 • start at an unused source (in  $P$ ),
- 283 • whenever at a vertex of  $P$ , stop if that vertex is a sink (in  $T_P$ ); otherwise it has an incident  
 284 outgoing edge of  $M_{\leftarrow}$ ; follow this edge,

285 • whenever at a vertex of  $Y$ , stop if that vertex is a sink (in  $T_Y$ ); otherwise it has an incident  
 286 outgoing edge of  $M_{\rightarrow}$ ; follow this edge.

287 Since every path must terminate at a different sink, at least  $k - (k - (|P| - |Y|)) = |P| - |Y|$  of  
 288 the  $P$ -sinks will be used. Furthermore, a path cannot revisit a vertex, since the indegree of every  
 289 vertex is at most 1 and sources have no incoming edges. This implies that all paths are simple and  
 290 vertex-disjoint.

291 The  $k$  paths constructed above might not yet be augmenting/alternating paths in the matroid inter-  
 292 section exchange graph, as they may contain chords; in general, only chordless paths guarantee that  
 293 applying them preserves independence. (Matroid intersection algorithms usually apply shortest paths,  
 294 which are chordless.) We need to shortcut them; however, doing so naively could destroy the property  
 295 that all left-to-right edges in the paths are between elements of the same color, which we require to  
 296 satisfy the condition in Definition 3.2.

297 We carry out the shortcutting as follows. Let  $X' = (p_1, y_1, p_2, y_2, \dots)$  be one of the  $k$  paths. As long  
 298 as there exists a chord of the form  $(p_i, y_j)$  with  $j > i$  (i.e., the directed edge  $y_j \leftarrow p_i$  exists in the  
 299 matroid intersection exchange graph; equivalently,  $Y + p_i - y_j \in \mathcal{I}$ ), replace the corresponding  
 300 subpath with this chord (i.e., remove the vertices  $y_i, p_{i+1}, \dots, p_j$  from the sequence  $X'$ ). Note that we  
 301 do not use chords of the form  $(y_i, p_j)$  with  $j > i$ . Doing this to each of the  $k$  paths obtains our final  
 302 collection  $X_1, \dots, X_k$ .

303 We now verify that it satisfies the statement of the lemma. As the paths before shortcutting were vertex-  
 304 disjoint, they remain so afterwards. We claim that the paths ending at  $P$ -sinks (recall that there are at  
 305 least  $|P| - |Y|$  many) yield augmenting sets, and the paths ending at  $Y$ -sinks yield alternating sets.  
 306 Consider a path  $X_i = (p_1, y_1, p_2, y_2, \dots)$ . Note that  $Y' = Y \triangle X_i = Y \cup \{p_1, p_2, \dots\} \setminus \{y_1, y_2, \dots\}$ .  
 307 The color-count condition of Definition 3.2 follows easily from the property that every left-to-right  
 308 edge  $y_i \rightarrow p_{i+1}$  in  $X_i$  belongs to  $M_{\rightarrow}$ , so  $y_i$  and  $p_{i+1}$  are of the same color. Thus we can take  $c'$  to  
 309 be the color of  $p_1$ . If the last element of  $X_i$  is in  $Y$  (a  $Y$ -sink), we take  $c''$  to be its color.

310 It remains to show that  $Y' = Y \triangle X_i \in \mathcal{I}$ . This argument closely follows that of [Sch03b], Theorem  
 311 41.2. Let us first consider the case where  $X_i$  ends at a  $Y$ -sink:  $X_i = (p_1, y_1, p_2, y_2, \dots, p_t, y_t)$ .  
 312 We want to apply Lemma 2.4 on the exchange graph for  $Y$  and  $Y'$  with respect to  $\mathcal{I}$ . This is a  
 313 bipartite graph on  $\{y_1, \dots, y_t\}$  on the left side and  $\{p_1, \dots, p_t\}$  on the right side, and it is equal to the  
 314 corresponding induced subgraph of edges going right-to-left in the matroid intersection exchange  
 315 graph; we need to show that it contains a unique perfect matching. We proceed iteratively:  $p_1$  cannot  
 316 be connected to any  $y_j$  with  $j > 1$ , for otherwise we would have a shortcut. So any matching must  
 317 have  $p_1$  matched to  $y_1$ . Removing these two vertices, we consider the out-neighborhood of  $p_2$ . Again,  
 318  $p_2$  has no shortcuts to later  $y_j$ , so its only out-neighbor (after the removal of  $y_1$ ) is  $y_2$ . So,  $p_2$  must be  
 319 matched to  $y_2$ . We may continue inductively to construct the unique matching between  $\{y_1, \dots, y_t\}$   
 320 and  $\{p_1, \dots, p_t\}$ .

321 The case where  $X_i = (p_1, y_1, p_2, y_2, \dots, p_t, y_t, p_{t+1})$  ends at a  $P$ -sink is similar, with one more  
 322 step. The first case shows that  $Z = Y \cup \{p_1, \dots, p_t\} \setminus \{y_1, \dots, y_t\}$  is independent. We need only  
 323 show that  $Z + p_{t+1}$  is independent. Note that  $p_{t+1} \in T_P$ , meaning that  $Y + p_{t+1} \in \mathcal{I}$ . By  
 324 the matroid augmentation property,  $Y + p_{t+1}$  must have an element which can be added to  $Z$   
 325 while preserving independence. The possible candidates are  $(Y + p_{t+1}) \setminus Z = \{y_1, \dots, y_t, p_{t+1}\}$ .  
 326 However, no  $y_j$  can be added: since  $p_1, \dots, p_t \notin T_P$ , we know that  $Y \cup \{p_1, \dots, p_t\}$  has rank  $|Y|$ , and  
 327  $Z + y_j \subseteq Y \cup \{p_1, \dots, p_t\}$  would have rank  $|Z| + 1 = |Y| + 1$  if  $Z + y_j$  were independent. Therefore  
 328 the only possible candidate is  $p_{t+1}$ , and so we have that  $Y' = Z + p_{t+1}$  is independent.  $\square$

329 Now we are ready to state and prove our main result.

330 **Theorem 3.4** *There is a randomized polynomial-time algorithm for FMMSM parametrized by*  
 331  *$\varepsilon \in (0, 1)$  that outputs a set  $S \in \mathcal{I} \cap \mathcal{U}$  (i.e., independent and upper-fair) such that*

- 332 •  $\mathbb{E}[|S|] \geq (1 - \varepsilon)N$  with a high-probability tail bound:  
 333 for  $\delta > 0$ ,  $\mathbb{P}[|S| < (1 - \delta)(1 - \varepsilon)N] \leq \exp(-\Omega_\delta(N))$
- 334 •  $\mathbb{E}[f(S)] \geq 0.499 \cdot \varepsilon \cdot \text{OPT}_{\text{MatInt}}$
- 335 • for every  $c \in [C]$  we have  $\mathbb{E}[|S \cap V_c|] \geq (1 - \varepsilon)\ell_c$



336 • with a high-probability tail bound on the total fairness violation:  
 337 for  $\delta > 0$ ,  $\mathbb{P}[\text{fav}(S) > (1 + \delta)\varepsilon \sum_c \ell_c] \leq \exp(-\Omega_\delta(\sum_c \ell_c))$

338 where  $N$  is the maximum size of a set in  $\mathcal{I} \cap \mathcal{U}$ , and  $\text{OPT}_{\text{MatInt}}$  is the maximum  $f$ -value of a set in  
 339  $\mathcal{I} \cap \mathcal{U}$  (clearly we have  $\text{OPT}_{\text{MatInt}} \geq \text{OPT}$  as  $\mathcal{C} \subseteq \mathcal{U}$ ).

340 We stress that  $S$  is upper-fair with probability 1, not only in expectation. We also remark that one can  
 341 show a similar tail bound for every individual  $\ell_c$ , though the right-hand side  $\exp(-\Omega_\delta(\ell_c))$  may not  
 342 be meaningful unless  $\ell_c$  is large. On the other hand, no such bound can be shown for the  $f$ -value,  
 343 which in the worst case can be concentrated on a single element of the universe.

344 *Proof of Theorem 3.4.* As the first step, we compute a maximum-cardinality fair and independent  
 345 set  $P$ , which may be done in polynomial time by Lemma 2.5. We can say that  $|P| = N$ , i.e., the  
 346 maximum size of an independent and fair set is the same as the maximum size of an independent  
 347 and upper-fair set. To see this, suppose that there was an independent and upper-fair set  $F$  with  
 348  $|F| > |P|$ ; then we could apply Lemma 3.3 to  $P$  and  $F$  to obtain an augmenting set  $X$ , and  $P \Delta X$   
 349 would be a larger independent and fair set, a contradiction.

350 As the second step, we compute a high-value independent and upper-fair set  $Y_0$ . Using the algorithm  
 351 of Theorem 2.7 ([LSV10]) (with  $\delta = 10^{-3}$ ) we get that

$$f(Y_0) \geq 0.499 \cdot \text{OPT}_{\text{MatInt}}. \quad (1)$$

352 We denote

$$k(Y) = \sum_{c \in [C]} \max(0, |P \cap V_c| - |Y \cap V_c|)$$

353 for any solution  $Y$ , and  $k := k(Y_0)$  to shorten notation.

354 We will perform a number  $I$  of iterations which will be  $(1 - \varepsilon)k$  in expectation. More precisely, let  
 355 us set  $I = \lceil (1 - \varepsilon)k \rceil$  with probability  $(1 - \varepsilon)k - \lfloor (1 - \varepsilon)k \rfloor$ , and  $\lfloor (1 - \varepsilon)k \rfloor$  otherwise.<sup>4</sup>

356 We perform  $I$  iterations. In the  $i$ -th iteration, we apply Lemma 3.3 to  $Y_{i-1}$  (and  $P$ ) to obtain  
 357 a collection  $X_i^1, \dots, X_i^{k(Y_{i-1})}$  of augmenting or alternating sets. We choose one of them,  $X_i \in$   
 358  $\{X_i^1, \dots, X_i^{k(Y_{i-1})}\}$ , uniformly at random, and apply it to obtain a new solution  $Y_i = Y_{i-1} \Delta X_i$ .  
 359 Finally, we return  $S := Y_I$ .

360 All solutions  $Y_0, \dots, Y_I$  are independent and upper-fair; it remains to verify the guarantees of Theo-  
 361 rem 3.4. We start by noting that

$$k(Y_i) = k - i. \quad (2)$$

362 To see this, note that during the algorithm's execution, no new color ever becomes undersaturated, as  
 363 by Definition 3.2,  $Y_i$  can have fewer elements than  $Y_{i-1}$  in a color  $c''$  only if  $c''$  was oversaturated  
 364 in  $Y_{i-1}$ . On the other hand, for exactly one undersaturated color  $c'$ ,  $Y_i$  has one more element in  $c'$   
 365 than  $Y_{i-1}$ . Thus we have  $k(Y_i) = k(Y_{i-1}) - 1$  and (2) follows. (Colors  $c$  that are neither under- or  
 366 oversaturated remain such forever.)

367 **Fairness lower bounds.** Building upon the previous paragraph, we consider a random process  
 368 involving colored balls that will mirror what is happening in the algorithm. Let  $U \subseteq [C]$  be the set of  
 369 colors that are undersaturated in  $Y_0$ . At the beginning, for every  $c \in U$ , we create  $|P \cap V_c| - |Y_0 \cap V_c|$   
 370 balls of color  $c$ . (So we start with  $k$  balls in total.) At every iteration  $i$  there is exactly one color  $c'$   
 371 (that is undersaturated in  $Y_{i-1}$ , so  $c' \in U$ ) where  $|Y_i \cap V_{c'}| = |Y_{i-1} \cap V_{c'}| + 1$ ; we then remove  
 372 one random ball of color  $c'$ . Then, by Definition 3.2 (since all other colors in  $U$  retain their element  
 373 count), we have that the number of balls of every color  $c \in U$  is equal to  $|P \cap V_c| - |Y_i \cap V_c|$  (and  
 374 their total number is  $k(Y_i) = k - i$ ).

375 Now we claim that in this process, at every iteration a uniformly random ball is removed. This is  
 376 because, by Lemma 3.3, for every  $c \in U$ , exactly  $|P \cap V_c| - |Y_{i-1} \cap V_c|$  of the  $k(Y_{i-1})$  augmenting  
 377 or alternating sets increase  $c$ , and we choose randomly among these sets.

<sup>4</sup>Ideally we would just set  $I = (1 - \varepsilon)k$ , but this number can be fractional, and using a fixed value of  $\lfloor (1 - \varepsilon)k \rfloor$  or  $\lceil (1 - \varepsilon)k \rceil$  would lead to losses in objective value, cardinality, or fairness. For example, if  $\ell_c = 1$ , then a bound such as  $|S \cap V_c| \geq (1 - \varepsilon)\ell_c - 1$  would be meaningless.

It follows that at the end, the set of removed  $I$  balls is distributed uniformly among all subsets of this size. Consider a color  $c$ . If  $c \notin U$ , then  $c$  will not be undersaturated at the end, so  $|S \cap V_c| \geq |P \cap V_c| \geq \ell_c$ . Now fix  $c \in U$  and denote by  $B_c$  the number of removed balls of color  $c$ . Conditioning on  $I$ , we have

$$\begin{aligned}\mathbb{E}[|S \cap V_c|] &= \mathbb{E}[|Y_0 \cap V_c| + B_c] \\ &= |Y_0 \cap V_c| + \frac{I}{k}(|P \cap V_c| - |Y_0 \cap V_c|) \\ &\geq \frac{I}{k}|P \cap V_c| \\ &\geq \frac{I}{k}\ell_c\end{aligned}$$

and thus  $\mathbb{E}[|S \cap V_c|] = \mathbb{E}[\mathbb{E}[|S \cap V_c| \mid I]] \geq \frac{\mathbb{E}[I]}{k}\ell_c = (1 - \varepsilon)\ell_c$  as required.

**Cardinality.** Our proof that  $\mathbb{E}[|S|] \geq (1 - \varepsilon)|P| = (1 - \varepsilon)N$  is very similar to the proof above for a single color. We start with  $|P| - |Y_0|$  red balls and  $k - (|P| - |Y_0|)$  non-red balls ( $k$  in total). At every iteration  $i$ , if an augmenting set was chosen (so that  $|Y_i| = |Y_{i-1}| + 1$ ), we remove a red ball, otherwise we remove a non-red ball. Suppose that at every iteration  $i$  there were exactly  $|P| - |Y_{i-1}|$  augmenting sets among the  $k - i + 1$  sets; then the set of balls removed at the end would be distributed uniformly among all subsets of  $I$  balls. Then, if  $B$  denotes the number of removed red balls, we would have  $\mathbb{E}[B] = \frac{I}{k}(|P| - |Y_0|)$  (conditioned on  $I$ ). Now, in fact at every iteration  $i$  there are *at least*  $|P| - |Y_{i-1}|$  augmenting sets among the  $k - i + 1$  sets; hence, the distribution of  $B$  dominates the above uniform-ball-subset distribution, which is formally known as Hypergeometric( $k, |P| - |Y_0|, I$ ). In particular, this implies that  $\mathbb{E}[B] \geq \frac{I}{k}(|P| - |Y_0|)$ . We conclude by saying that  $\mathbb{E}[|S|] = |Y_0| + \mathbb{E}[B] \geq |Y_0| + \frac{\mathbb{E}[I]}{k}(|P| - |Y_0|) \geq (1 - \varepsilon)|P|$ .

**Cardinality tail bound.** Recall that  $N = |P|$ , and that for any  $\delta > 0$  we want to prove that  $\mathbb{P}[|S| < (1 - \delta)(1 - \varepsilon)N] \leq \exp(-\Omega_\delta(N))$ . It is known [Hoe63] that the hypergeometric distribution satisfies the same Chernoff-type bounds as the binomial distribution (as it corresponds to a sum of samples that are negatively correlated, rather than independent). In particular (conditioning on  $I$  throughout), we have

$$\mathbb{P}\left[B < \left(1 - \frac{\delta}{2}\right)\mu\right] \leq \exp\left(-\frac{1}{2}\left(\frac{\delta}{2}\right)^2\mu\right) \leq \exp(-\Omega_\delta(\mu))$$

$$\text{where } \mu = \mathbb{E}[\text{Hypergeometric}(k, |P| - |Y_0|, I)] = \frac{I}{k}(|P| - |Y_0|).$$

If  $|Y_0| \geq (1 - \delta)(1 - \varepsilon)N$ , then  $|S| = |Y_0| + B$  is large enough with probability 1, so we can assume otherwise, i.e., that  $|Y_0| < (1 - \delta)(1 - \varepsilon)N \leq (1 - \delta)N$ . Thus

$$k \geq |P| - |Y_0| \geq \delta N > \Omega(1), \quad (3)$$

so for  $N$  large enough we have  $\frac{1}{k} < \frac{\delta}{2}(1 - \varepsilon)$  and thus  $\frac{I}{k} \geq \frac{\lfloor (1 - \varepsilon)k \rfloor}{k} \geq \frac{(1 - \varepsilon)k - 1}{k} = 1 - \varepsilon - \frac{1}{k} \geq (1 - \frac{\delta}{2})(1 - \varepsilon)$ . By this and (3),  $\mu = \frac{I}{k}(|P| - |Y_0|) \geq (1 - \frac{\delta}{2})(1 - \varepsilon)\delta N \geq \Omega_\delta(N)$ , so that  $\exp(-\Omega_\delta(\mu)) = \exp(-\Omega_\delta(N))$ . Finally, if the good event  $B \geq (1 - \frac{\delta}{2})\mu$  happens, then

$$B \geq \left(1 - \frac{\delta}{2}\right)\frac{I}{k}(|P| - |Y_0|) \geq \left(1 - \frac{\delta}{2}\right)^2(1 - \varepsilon)(|P| - |Y_0|) \geq (1 - \delta)(1 - \varepsilon)(|P| - |Y_0|)$$

and thus  $|S| = |Y_0| + B \geq (1 - \delta)(1 - \varepsilon)N$ .

**Total fairness violation tail bound.** Let us first remark that the algorithm increases some undersaturated color  $c'$  at every iteration, so one could think that  $\text{fav}(S)$  is small with probability 1. However, undersaturation is measured with respect to  $P$ , and we can have  $|P \cap V_c| \gg \ell_c$  for some  $c$ . Increasing a color beyond  $\ell_c$  elements does not make progress with respect to fairness violation. Nevertheless, we can prove a high-concentration bound in terms of  $\ell_c$ . Recall that for any  $\delta > 0$  we want to show that  $\mathbb{P}[\text{fav}(S) > (1 + \delta)\varepsilon \sum_c \ell_c] \leq \exp(-\Omega_\delta(\sum_c \ell_c))$ .

411 The proof will be similar as above, but now the balls, on top of having a color, can be *striped* or  
 412 not. Namely, for each  $c \in [C]$ , we create  $\max(0, |P \cap V_c| - |Y_0 \cap V_c|)$  balls of color  $c$ , of which  
 413  $\max(0, \ell_c - |Y_0 \cap V_c|)$  many will be *striped*. (We have  $k$  balls in total, of which  $\text{fav}(Y_0)$  are striped.)  
 414 Again, at each iteration, if  $c'$  is the color that the algorithm increases, we remove a random ball of  
 415 color  $c'$ .

416 Let  $X$  be the number of striped balls removed by the end. We then have

$$\text{fav}(S) \leq \text{fav}(Y_0) - X. \quad (4)$$

417 This is because whenever we increase some color  $c'$  that has fewer than  $\ell_{c'}$  elements, the fairness  
 418 violation of the solution decreases by 1, but  $X$  only accounts for this decrease if we happen to sample  
 419 a *striped*  $c'$ -colored ball. Since there are only as many striped  $c'$ -colored balls as there are fairness  
 420 violations of color  $c'$ , at the end we will have removed at least as many of the violations as of the  
 421 balls.

422 Now we proceed as for cardinality. We have

$$\mathbb{P} \left[ X < \left( 1 - \frac{\delta\varepsilon}{2} \right) \mu \right] \leq \exp \left( -\frac{1}{2} \left( \frac{\delta\varepsilon}{2} \right)^2 \mu \right) \leq \exp(-\Omega_\delta(\mu))$$

$$\text{where } \mu = \mathbb{E}[\text{Hypergeometric}(k, \text{fav}(Y_0), I)] = \frac{I}{k} \text{fav}(Y_0).$$

423 If  $\text{fav}(Y_0) \leq (1 + \delta)\varepsilon \sum_c \ell_c$  then we are done, so assume otherwise. Then

$$k \geq \text{fav}(Y_0) > (1 + \delta)\varepsilon \sum_c \ell_c > \Omega(1), \quad (5)$$

424 so for  $\sum_c \ell_c$  large enough we have  $\frac{1}{k} < \frac{\delta\varepsilon}{2}(1 - \varepsilon)$  and thus  $\frac{I}{k} \geq 1 - \varepsilon - \frac{1}{k} \geq (1 - \frac{\delta\varepsilon}{2})(1 - \varepsilon)$ . By  
 425 this and (5),  $\mu = \frac{I}{k} \text{fav}(Y_0) \geq (1 - \frac{\delta\varepsilon}{2})(1 - \varepsilon)(1 + \delta)\varepsilon \sum_c \ell_c \geq \Omega(\sum_c \ell_c)$ , so that  $\exp(-\Omega_\delta(\mu)) =$   
 426  $\exp(-\Omega_\delta(\sum_c \ell_c))$ . Finally, if the good event  $X \geq (1 - \frac{\delta\varepsilon}{2})\mu$  happens, then

$$X \geq \left( 1 - \frac{\delta\varepsilon}{2} \right) \frac{I}{k} \text{fav}(Y_0) \geq \left( 1 - \frac{\delta\varepsilon}{2} \right)^2 (1 - \varepsilon) \text{fav}(Y_0) \geq (1 - \delta\varepsilon - \varepsilon) \text{fav}(Y_0)$$

427 and thus

$$\text{fav}(S) \stackrel{(4)}{\leq} \text{fav}(Y_0) - X \leq \text{fav}(Y_0) - (1 - \delta\varepsilon - \varepsilon) \text{fav}(Y_0) = (1 + \delta)\varepsilon \text{fav}(Y_0) \leq (1 + \delta)\varepsilon \sum_c \ell_c.$$

428 **Objective value.** Intuitively, at every iteration  $i$ , we select randomly from among  $k - i + 1$  disjoint  
 429 augmenting or alternating sets. Even if the newly added elements do not add any  $f$ -value, by  
 430 submodularity we expect to lose only at most a  $1/(k - i + 1)$  fraction of the  $f$ -value of the current  
 431 solution. After  $I \approx (1 - \varepsilon)k$  iterations we then end up with a telescoping product that simplifies to  
 432  $\frac{\varepsilon k}{k} f(Y_0)$ .

433 We now give a formal proof. We show by induction on  $i$  that

$$\mathbb{E}[f(Y_i)] \geq \frac{k - i}{k} f(Y_0). \quad (6)$$

434 For  $i \geq 1$ , condition on  $Y_{i-1}$ . Then

$$\begin{aligned} \mathbb{E}[f(Y_i)] &= \mathbb{E}[f(Y_{i-1} \triangle X_i)] \\ &= \frac{1}{k(Y_{i-1})} \sum_{j=1}^{k(Y_{i-1})} f(Y_{i-1} \triangle X_i^j) \\ &\geq \frac{1}{k - i + 1} \sum_{j=1}^{k - i + 1} f(Y_{i-1} \setminus (Y_{i-1} \cap X_i^j)) \\ &\geq \frac{k - i}{k - i + 1} f(Y_{i-1}), \end{aligned}$$

where the first inequality follows by monotonicity and the second inequality is by applying Fact 2.1 to the set family  $Y_{i-1} \cap X_i^1, \dots, Y_{i-1} \cap X_i^{k-i+1} \subseteq Y_{i-1}$ . Now taking expectation over  $Y_{i-1}$ ,

$$\begin{aligned} \mathbb{E}[f(Y_i)] &= \mathbb{E}[\mathbb{E}[f(Y_i) \mid Y_{i-1}]] \\ &\geq \mathbb{E}\left[\frac{k-i}{k-i+1} f(Y_{i-1})\right] \\ &\geq \frac{k-i}{k-1+1} \cdot \frac{k-(i-1)}{k} f(Y_0) \end{aligned}$$

where we applied the inductive hypothesis. Having (1) and (6), we can write

$$\mathbb{E}[f(S)] = \mathbb{E}[\mathbb{E}[f(Y_I) \mid I]] \geq \mathbb{E}\left[\frac{k-I}{k} f(Y_0)\right] = \frac{k-(1-\varepsilon)k}{k} f(Y_0) \geq \varepsilon \cdot 0.499 \cdot \text{OPT}_{\text{MatInt}}.$$

□

### 3.1 Deterministic algorithm

Now we turn to our deterministic result, Theorem 3.6. We begin by showing a lemma that is an analogue of Lemma 3.3.

**Lemma 3.5** *For any two matroids  $\mathcal{I}_1, \mathcal{I}_2$ , let  $Y, P \in \mathcal{I}_1 \cap \mathcal{I}_2$  be two sets in their intersection, with  $|Y| \leq |P|$ . Then we may find in polynomial time a collection  $X_1, \dots, X_{|P|-|Y|}$  of disjoint subsets of  $Y \cup P$  such that for each set  $X_i$  we have  $Y \triangle X_i \in \mathcal{I}_1 \cap \mathcal{I}_2$  and  $|Y \triangle X_i| = |Y| + 1$ .*

*Proof.* We proceed similarly as in the proof of Lemma 3.3. We consider the matroid intersection exchange graph for  $Y$  and  $P$  with respect to  $\mathcal{I}_1$  and  $\mathcal{I}_2$ , defined as in that proof. Define  $T = \{p \in P : Y + p \in \mathcal{I}_1\}$  and  $S = \{p \in P : Y + p \in \mathcal{I}_2\}$ . We have  $|T|, |S| \geq |P| - |Y|$ . Let  $T', S'$  be arbitrary subsets of  $T, S$  respectively, both of size exactly  $|P| - |Y|$ . We invoke Lemma 2.3 on the exchange graph for  $Y$  and  $P \setminus T'$ , obtaining  $M_{\leftarrow}$  as a perfect matching between  $Y$  and  $P \setminus T'$ . Similarly, we obtain  $M_{\rightarrow}$  as a perfect matching between  $Y$  and  $P \setminus S'$ .

Now we can construct the  $|P| - |Y|$  paths as in the proof of Lemma 3.3, starting from sources (set  $S'$ ) and proceeding in the only possible way until we reach a sink (vertex in  $T'$ ). (Alternatively, we can note that  $M_{\leftarrow} \cup M_{\rightarrow}$  is a circulation for demands – i.e., outflow minus inflow –  $+1$  on sources and  $-1$  on sinks, and take the paths from its cycle-path decomposition.) All paths start and end in  $P$ .

Next, we shortcut the paths. Here, we replace subpaths with chords in both directions, rather than only in one direction as in the proof of Lemma 3.3. Moreover, if there is an internal vertex that is in  $S$ , we need to truncate the path so that it begins at that vertex; and similarly, if there is an internal vertex that is in  $T$ , we truncate the path so that it ends at that vertex. These operations only shrink the vertex sets of the paths, thus they preserve their vertex-disjointness.

We end once the path  $X_i$  is from  $S$  to  $T$  via  $(Y \cup P) \setminus (S \cup T)$  and contains no chords. The same argument as in the proof of Lemma 3.3 then shows that  $X_i$  is an augmenting path, i.e., that  $Y \triangle X_i \in \mathcal{I}_1 \cap \mathcal{I}_2$ . □

Now we can state our deterministic algorithm for any two matroids  $\mathcal{I}_1$  and  $\mathcal{I}_2$ .

**Theorem 3.6** *There is a deterministic polynomial-time algorithm for the problem of maximizing a monotone submodular function subject to a matroid intersection constraint, parametrized by  $\varepsilon \in (0, 1)$ , that outputs a set  $S \in \mathcal{I}_1 \cap \mathcal{I}_2$  such that*

- $|S| > (1 - \varepsilon)N - 1$
- $f(S) \geq 0.499 \cdot \varepsilon \cdot \text{OPT}_{\text{MatInt}}$

where  $N$  is the maximum size of a set in  $\mathcal{I}_1 \cap \mathcal{I}_2$ , and  $\text{OPT}_{\text{MatInt}}$  is the maximum  $f$ -value of a set in  $\mathcal{I}_1 \cap \mathcal{I}_2$ .

471 *Proof.* As in the algorithm of Theorem 3.4, we start by computing a maximum-cardinality set  $P$  in  
 472 the matroid intersection, as well as a high-value set  $Y$  in the matroid intersection. We have  $|P| = N$   
 473 and  $f(Y_0) \geq 0.499 \cdot \text{OPT}_{\text{MatInt}}$ .

474 We then perform  $I := \lfloor (1 - \varepsilon)(|P| - |Y_0|) \rfloor$  iterations. In the  $i$ -th iteration, we apply Lemma 3.5  
 475 to  $Y_{i-1}$  (and  $P$ ) to obtain a collection  $X_i^1, \dots, X_i^{|P|-|Y_{i-1}|}$  of sets. We choose the one of them,  
 476  $X_i \in \{X_i^1, \dots, X_i^{|P|-|Y_{i-1}|}\}$ , that, when used to obtain a new solution  $Y_i = Y_{i-1} \triangle X_i$ , maximizes  
 477  $f(Y_i)$ . Finally, we return  $S := Y_I$ .

478 All solutions  $Y_0, \dots, Y_I$  are in the matroid intersection, and they grow in size by 1 per step. Thus we  
 479 have  $|S| = |Y_0| + \lfloor (1 - \varepsilon)(|P| - |Y_0|) \rfloor > |Y_0| + (1 - \varepsilon)(|P| - |Y_0|) - 1 \geq (1 - \varepsilon)|P| - 1 = (1 - \varepsilon)N - 1$ .

480 The proof for the objective value guarantee is the same as in Theorem 3.4; at each step, since an  
 481 average set preserves a  $\frac{|P|-|Y_0|-i}{|P|-|Y_0|-i+1}$  fraction of the value, so does the best set. We conclude by  
 482 saying that since  $I \leq (1 - \varepsilon)(|P| - |Y_0|)$ ,

$$f(S) = f(Y_I) \geq \frac{|P| - |Y_0| - (1 - \varepsilon)(|P| - |Y_0|)}{|P| - |Y_0|} f(Y_0) \geq \varepsilon \cdot 0.499 \cdot \text{OPT}_{\text{MatInt}}.$$

483  $\square$

## 484 4 Experimental evaluation

485 We evaluate the performance of our algorithms empirically against prior work and natural baselines  
 486 closely following the experimental setup of prior work [EMNTT20; EFNTT23], on a suite of  
 487 benchmarks that are standard in the field: graph coverage, clustering, and recommender systems,  
 488 under different fairness and matroid constraint settings. Our metrics are the submodular objective  
 489 value  $f(S)$  and total fairness violation  $\text{fav}(S)$ . All of the considered algorithms return sets that are  
 490 independent and upper-fair, so the measured fairness violations are all with respect to the lower  
 491 bounds.

492 We compare the following algorithms:

- 493 • **OUR**( $\varepsilon$ ) – our algorithm of Theorem 3.4, for a range of settings of  $\varepsilon \in \{0.2, 0.5, 0.8\}$ . To  
 494 compute a high-value solution  $Y$ , we run the natural greedy algorithm, which obtains a  
 495  $1/3$ -approximation (Theorem 2.6), as the local search algorithm of Theorem 2.7, while  
 496 polynomial-time, is impractical. The large fair set  $P$  is obtained via augmenting paths,  
 497 ignoring  $f$ .
- 498 • **TWOPASS** – the algorithm of [EFNTT23] (Theorem 1.1). Since it was originally developed  
 499 for the streaming setting, to get a fair comparison we simplify away the parts (namely the first  
 500 pass) whose purpose was ensuring low memory usage. The first step of the algorithm obtains  
 501 a fair set via augmenting paths (ignoring  $f$ ). This is then divided in two, and each half is  
 502 extended to an independent and upper-fair solution using a matroid intersection subroutine.  
 503 For this we employ the greedy algorithm (the original implementation of [EFNTT23] used a  
 504 swapping algorithm to ensure low memory and linear runtime, but it obtains inferior values).
- 505 • **LBMI** (Lower Bound Matroid Intersection) – an algorithm that always returns a fair set,  
 506 with no theoretical guarantee on the value but with reasonably good value in practice (similar  
 507 in spirit to **GREEDY-FAIR-STREAMING** from [EFNTT23]). It starts by building a fair set  
 508 via augmenting paths, ignoring  $f$ , and then extends to a maximal solution using the greedy  
 509 algorithm.
- 510 • **UBMI** (Upper Bound Matroid Intersection) – an algorithm that ignores lower bound con-  
 511 straints and just solves the matroid intersection problem for  $\mathcal{I}$  and  $\mathcal{U}$  (similar in spirit to  
 512 **MATROID-INTERSECTION** from [EFNTT23]). Also here we use the greedy algorithm.
- 513 • **RANDOM** – an algorithm that randomly shuffles the universe and then adds each element if  
 514 this keeps the solution independent and upper-fair.

515 For a fair comparison of the main underlying ideas, we made sure that the compared algorithms,  
 516 particularly **OUR** and **TWOPASS**, use the same subroutines for similar tasks; for example, the

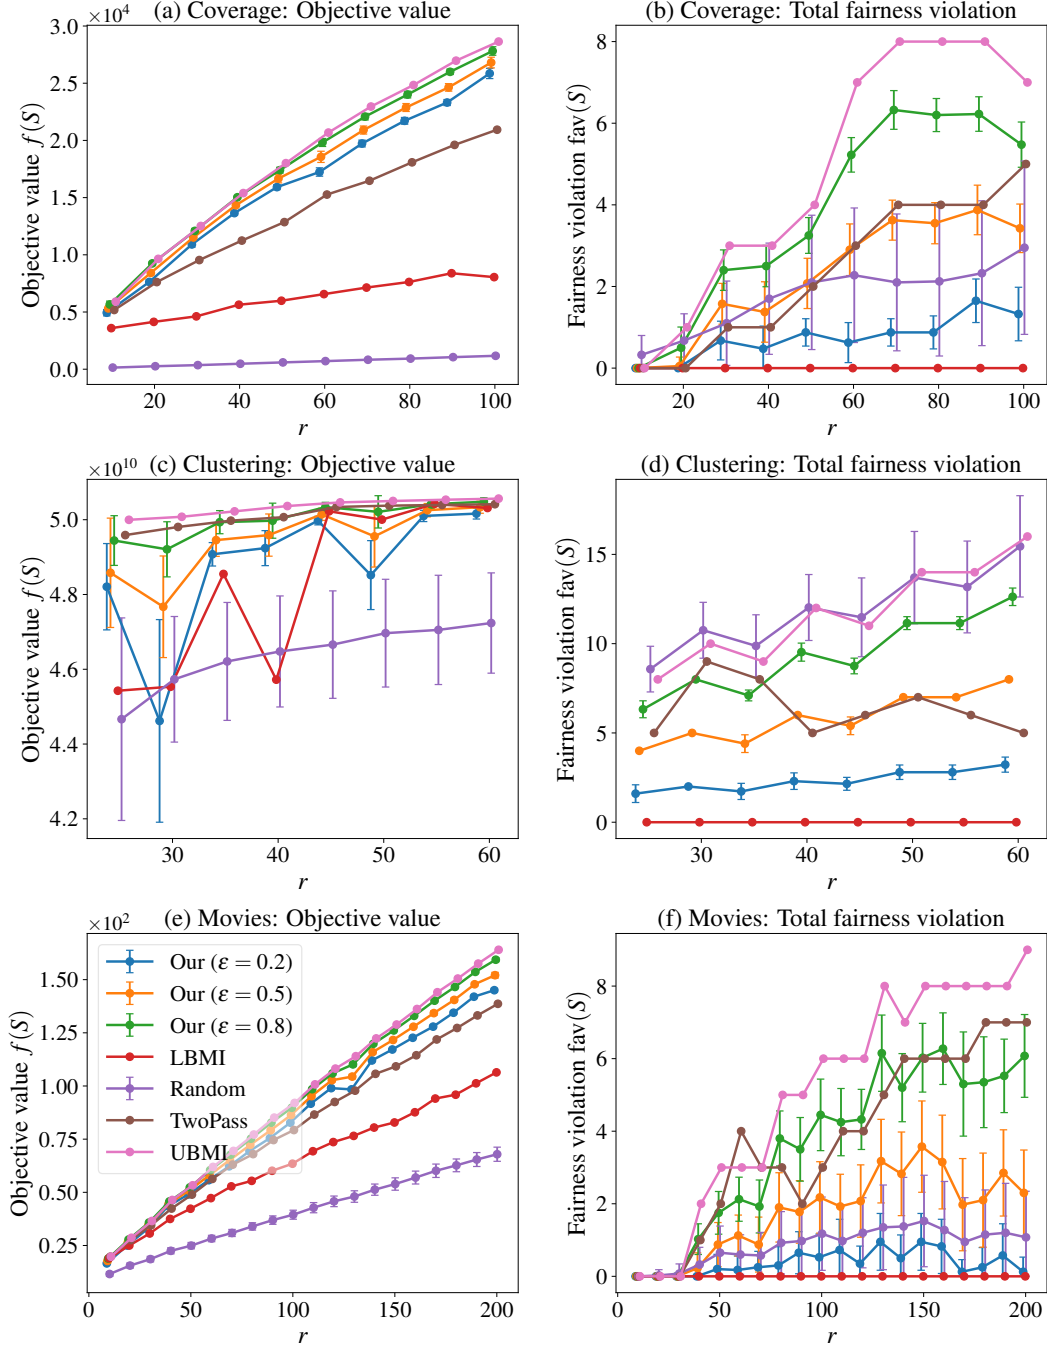

Figure 1: Our experimental results. Each row corresponds to one experiment; the left plot shows the objective value of each algorithm for a range of solution scale factors  $r$ , and the right plot shows fairness violations. For randomized algorithms we report averages, with error bars that correspond to sample standard deviation.

517 implementations could likely benefit from heuristically taking  $f$  into account rather than ignoring  $f$   
518 when building large fair sets, or from some local-search based postprocessing of the final solution.  
519 We do not compare to the algorithm of [ETNV24] (Theorem 1.2) as solving the multilinear extension  
520 makes it impractical.

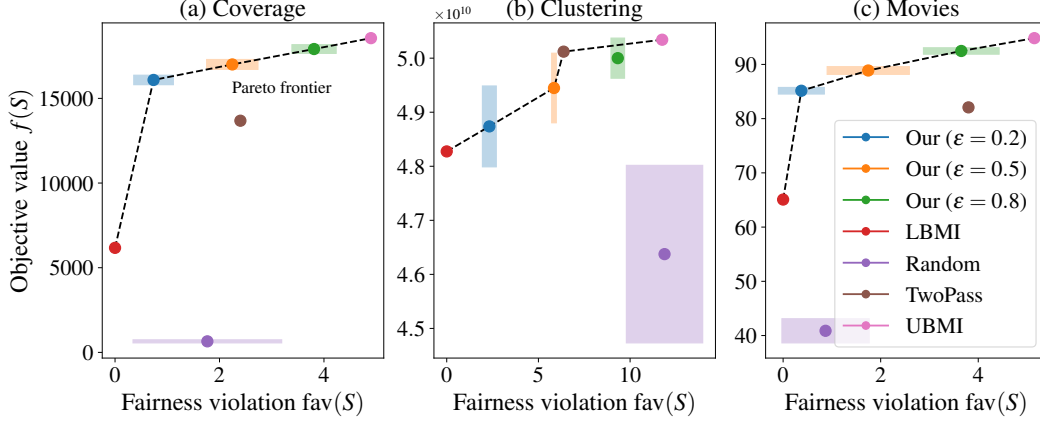

Figure 2: For each experiment and algorithm we take the average objective value and fairness violation over all  $r$ -values, and plot this as a single point. For randomized algorithms, the colored rectangles correspond to standard deviations. The dashed line corresponds to the Pareto frontier of the trade-off between objective value and fairness violation.

We repeat the randomized algorithms 40 times. All experiments can be run on commodity hardware (CPU only, single-threaded; we do not report runtimes) and take several hours to finish. Our code is in the supplementary material.

We outline the experimental scenarios below. In each experiment we vary a solution size scaling factor  $r$ , which roughly corresponds to the rank of the matroid  $\mathcal{I}$ . We select fairness bounds  $\ell_c, u_c$  to ensure feasibility, requiring that each color group  $V_c$  is proportionally represented in the solution set  $S$  – either matching its share in the dataset (coverage, movies) or ensuring similar group sizes (clustering). Results are reported in Figs. 1 and 2 and discussed in Section 4.4.

**Computational complexity.** We start with the complexity of the general randomized algorithm of Theorem 3.4. Firstly, the runtime of constructing  $P$  (a maximum-cardinality fair and independent set) via augmenting paths is  $O(N^{1.5}|V|)$  (by [Sch03b], Chapter 41.2 Notes). To construct  $Y$  (an upper-fair and independent set of high  $f$ -value), we expend  $O(N|V|)$  time using the greedy algorithm.

Next, at each of the  $I$  iterations, we must (1) recompute the exchange graph between  $Y_i$  and  $P$ , (2) find  $M_{\leftarrow}$  and  $M_{\rightarrow}$  as the subgraph of interest, (3) decompose  $M_{\leftarrow} \cup M_{\rightarrow}$  into paths, and (4) shortcut these paths. Step (1) takes  $O(N^2)$  time, since we query if a directed edge exists between  $y$  and  $p$  for all  $y \in Y$  and  $p \in P$ . Finding perfect matchings in step (2) takes at most  $O(N^3)$  time (in a practical implementation we could use the Hopcroft-Karp algorithm). Decomposing the resulting subgraph into paths takes at most  $O(N)$  time. And lastly, shortcutting the paths again takes at most  $O(N^2)$  time. Since  $I$  can be  $\Theta(N)$ , the total runtime is at most  $O(N^4)$ .

A more efficient implementation is possible if  $\mathcal{I}$  is a partition matroid. The intersection of two partition matroids can be naturally interpreted as a bipartite multigraph (the colors, i.e., parts of  $\mathcal{U}$  are one side, the parts of  $\mathcal{I}$  are the other side, and an element corresponds to an edge between the two parts it belongs to). In this case, we may look at the following exchange graph: direct the edges of  $Y$  from left to right, and the edges of  $P$  from right to left. This directed graph may be decomposed into paths. These paths are *simultaneously feasible*, and so we do not need to recompute an exchange graph at every step (or shortcut). Since there are  $O(N)$  edges, the runtime to decompose this directed graph is  $O(N)$ . Over the  $I$  iterations, we have a total runtime of at most  $O(N^2)$ .

#### 4.1 Graph coverage

We use the Pokec social network [LK14]. Given a digraph  $G = (V, E)$  of users and their friendships, we select a subset  $S \subseteq V$  to maximize coverage, defined by  $f(S) = |\bigcup_{v \in S} N(v)|$ , where  $N(v)$  is the neighborhood of  $v$ . User profiles include age, gender, height, and weight. We impose a partition matroid on body mass index (BMI). Profiles missing height or weight or with implausible data are removed, yielding a graph with 582,289 nodes and 5,834,695 edges. Users are partitioned into four

BMI categories (underweight, normal, overweight, obese), with upper bounds  $\lceil \frac{|V_i|}{|V|} r \rceil$  for each group  $V_i$ . We also enforce fairness by age, with 7 groups:  $[1, 10]$ ,  $[11, 17]$ ,  $[18, 25]$ ,  $[26, 35]$ ,  $[36, 45]$ ,  $[46, +]$ , no age. We set  $\ell_c = \lfloor 0.9 \frac{|V_c|}{|V|} r \rfloor$  and  $u_c = \lceil 1.5 \frac{|V_c|}{|V|} r \rceil$ . We use  $r$  from 10 to 200.

## 4.2 Exemplar-based clustering

We use a dataset of 4521 phone calls from a Portuguese bank marketing campaign [MCR14]. The goal is to select a representative subset  $S \subseteq V$  for service quality assessment. Each record  $e \in V$  is represented as  $x_e \in \mathbb{R}^7$  using 7 numeric features, including age and account balance. We impose a partition matroid on account balance, with 5 groups:  $(-\infty, 0)$ ,  $[0, 2000)$ ,  $[2000, 4000)$ ,  $[4000, 6000)$ ,  $[6000, \infty)$ . Each group  $V_i$  has upper bound  $r/5$ . Fairness is enforced by age, with 6 groups:  $[0, 29]$ ,  $[30, 39]$ ,  $[40, 49]$ ,  $[50, 59]$ ,  $[60, 69]$ ,  $[70, +]$ , and bounds  $\ell_c = 0.1r + 2$ ,  $u_c = 0.4r$  for each  $c$ . We maximize the monotone submodular function [GK10]:  $f(S) = \sum_{e' \in V} (d(e', 0) - \min_{e \in S \cup \{0\}} d(e', e))$  where  $d(e', e) = \|x_{e'} - x_e\|_2^2$  and  $x_0$  is the origin. We use  $r$  from 30 to 60.

## 4.3 Recommender system

We simulate a movie recommendation system using the Movielens 1M dataset [HK16], with about one million ratings for 3900 movies by 6040 users. As in prior work [MBNTC17; NTMZMS18; EM-NTT20; EFNTT23], we compute a low-rank completion of the user-movie matrix [TCSBHTBA01], yielding  $w_u \in \mathbb{R}^{20}$  for each user  $u$  and  $v_m \in \mathbb{R}^{20}$  for each movie  $m$ . The product  $w_u^\top v_m$  estimates user  $u$ 's rating for movie  $m$ . For user  $u$ , the monotone submodular utility for a set  $S$  of movies is  $f(S) = \alpha \cdot \sum_{m' \in M} \max(\max_{m \in S} (v_m^\top v_{m'}), 0) + (1 - \alpha) \cdot \sum_{m \in S} w_u^\top v_m$ , with parameter  $\alpha = 0.85$  balancing coverage and personalized user score. We enforce proportional representation of movies by release date using a partition matroid with 9 decade groups (1911–2000), with upper bounds  $\lceil 1.2 \frac{|V_d|}{|V|} r \rceil$  for each decade  $V_d$ . Movies are also partitioned into 18 genres  $c$  (colors), with fairness bounds  $\ell_c = \lfloor 0.8 \frac{|V_c|}{|V|} r \rfloor$  and  $u_c = \lceil 1.4 \frac{|V_c|}{|V|} r \rceil$ . We use  $r$  from 10 to 200.

## 4.4 Results and discussion

Our results are depicted in Figs. 1 and 2. Similarly as prior work, we observe that enforcing fairness does come at some cost in the utility value, and that the utility values of the algorithms are much better in practice than the theoretical bounds guarantee.

In all three experiments, our algorithms produce solutions whose value is relatively competitive with UBMI, which completely ignores the lower bound constraints and accordingly has the highest fairness violations. In two of the three scenarios (coverage and movies), all OUR algorithms produce a higher  $f$ -value than all the other baselines (RANDOM, LBMI, and TWOPASS); in particular, TWOPASS is dominated by both OUR(0.2) and OUR(0.5) with respect to both metrics. For clustering the situation is somewhat unclear, but TWOPASS generally does better. In terms of violation of the lower bound fairness constraints, our different settings of  $\varepsilon$ , as expected, provide a smooth tradeoff. The baseline that guarantees no fairness violations, LBMI, does relatively poorly in terms of  $f$ -value.

This tunability of  $\varepsilon$  is a key strength of our approach, allowing users to select an operating point that best matches their specific requirements for the balance between utility and fairness.

## 5 Conclusion, limitations, broader impact, and future work

In this work we gave an improved algorithm for FMMSM which, for any  $\varepsilon > 0$ , returns an approximate solution that satisfies an expected  $(1 - \varepsilon)$  fraction of each fairness lower bound while satisfying the matroid constraint and the fairness upper bound constraints exactly; the returned solution is also large in size and enjoys high-concentration guarantees.

Recent studies have shown that automated algorithms used in decision-making can introduce bias and discrimination. We make progress towards mitigating such effects in problems that can be formulated as submodular maximization under a matroid constraint, which are relevant to a range of applications such as forming representative committees or curating content for news feeds. We show the strong



performance of our algorithm empirically on several real-world tasks. As in prior work, we observe that there is indeed a balance between fairness and utility value; however, this “price of fairness” should not be interpreted as fairness leading to inferior outcomes, but rather as a trade-off between two valuable metrics. The parametric nature of our algorithm (the tunable  $\varepsilon$  parameter) provides a new tool to help in navigating this balance.

Our work leaves open the exciting question of the approximability of FMMSM (without violations of fairness constraints) and MSPM. Is there a constant-factor approximation algorithm for MSPM? Or is there a superconstant hardness of approximation for FMMSM? (As remarked in [ETNV24], the latter result would give a negative answer to a fundamental question posed by Vondrák [Von13].) We also do not consider non-monotone objective functions or the streaming setting in this work.

Finally, it is important to note that the fairness notion we employ, though standard and general, does not capture some notions of fairness considered in the literature (see e.g. [CR18; TWRTZ19]). No universal definition of fairness exists; the choice of which definition to apply is application-dependent and an active area of research.

## References

- [Bid06] Dan Biddle. *Adverse impact and test validation: A practitioner’s guide to valid and defensible employment testing*. Gower Publishing, Ltd., 2006.
- [BLS17] Markus Brill, Jean-François Laslier, and Piotr Skowron. “Multiwinner Approval Rules as Apportionment Methods”. In: *AAAI*. AAAI Press, 2017, pp. 414–420.
- [CCPV11] Gruia Calinescu, Chandra Chekuri, Martin Pál, and Jan Vondrák. “Maximizing a Monotone Submodular Function Subject to a Matroid Constraint”. In: *SIAM Journal on Computing* 40.6 (2011), pp. 1740–1766. DOI: 10.1137/080733991.
- [CCRL13] Joanne McGrath Cohoon, James P. Cohoon, Seth Reichelson, and Selwyn Lawrence. “Effective Recruiting for Diversity”. In: *FIE*. IEEE Computer Society, 2013, pp. 1123–1124.
- [CHV18] L. Elisa Celis, Lingxiao Huang, and Nisheeth K. Vishnoi. “Multiwinner Voting with Fairness Constraints”. In: *IJCAI*. ijcai.org, 2018, pp. 144–151.
- [CKLV17] Flavio Chierichetti, Ravi Kumar, Silvio Lattanzi, and Sergei Vassilvitskii. “Fair Clustering Through Fairlets”. In: *NIPS*. 2017, pp. 5029–5037.
- [CKLV19] Flavio Chierichetti, Ravi Kumar, Silvio Lattanzi, and Sergei Vassilvitskii. “Matroids, Matchings, and Fairness”. In: *AISTATS*. Vol. 89. Proceedings of Machine Learning Research. PMLR, 2019, pp. 2212–2220.
- [CKSDKV18] L. Elisa Celis, Vijay Keswani, Damian Straszak, Amit Deshpande, Tarun Kathuria, and Nisheeth K. Vishnoi. “Fair and Diverse DPP-Based Data Summarization”. In: *ICML*. Vol. 80. Proceedings of Machine Learning Research. PMLR, 2018, pp. 715–724.
- [CR18] Alexandra Chouldechova and Aaron Roth. “The frontiers of fairness in machine learning”. In: *arXiv preprint arXiv:1810.08810* (2018).
- [CSV18] L. Elisa Celis, Damian Straszak, and Nisheeth K. Vishnoi. “Ranking with Fairness Constraints”. In: *ICALP*. Vol. 107. LIPIcs. Schloss Dagstuhl - Leibniz-Zentrum für Informatik, 2018, 28:1–28:15.
- [CVZ10] Chandra Chekuri, Jan Vondrák, and Rico Zenklusen. “Dependent Randomized Rounding via Exchange Properties of Combinatorial Structures”. In: *FOCS*. IEEE Computer Society, 2010, pp. 575–584.
- [DHPRZ12] Cynthia Dwork, Moritz Hardt, Toniann Pitassi, Omer Reingold, and Richard Zemel. “Fairness through awareness”. In: *Proceedings of the 3rd innovations in theoretical computer science conference*. 2012, pp. 214–226.
- [DK11] Abhimanyu Das and David Kempe. “Submodular meets Spectral: Greedy Algorithms for Subset Selection, Sparse Approximation and Dictionary Selection”. In: *ICML*. Omnipress, 2011, pp. 1057–1064.
- [EFNTT23] Marwa El Halabi, Federico Fusco, Ashkan Norouzi-Fard, Jakab Tardos, and Jakub Tarnawski. “Fairness in Streaming Submodular Maximization over a Matroid Constraint”. In: *International Conference on Machine Learning*. PMLR. 2023, pp. 9150–9171.

655 [EG11] Khalid El-Arini and Carlos Guestrin. “Beyond keyword search: discovering  
656 relevant scientific literature”. In: *KDD*. ACM, 2011, pp. 439–447.

657 [EMNTT20] Marwa El Halabi, Slobodan Mitrovic, Ashkan Norouzi-Fard, Jakab Tardos, and  
658 Jakub Tarnawski. “Fairness in Streaming Submodular Maximization: Algorithms  
659 and Hardness”. In: *NeurIPS*. 2020.

660 [ETNV24] Marwa El Halabi, Jakub Tarnawski, Ashkan Norouzi-Fard, and Thuy-Duong  
661 Vuong. “Fairness in Submodular Maximization over a Matroid Constraint”. In:  
662 *International Conference on Artificial Intelligence and Statistics, 2-4 May 2024,*  
663 *Palau de Congressos, Valencia, Spain*. Ed. by Sanjoy Dasgupta, Stephan Mandt,  
664 and Yingzhen Li. Vol. 238. Proceedings of Machine Learning Research. PMLR,  
665 2024, pp. 1027–1035. URL: <https://proceedings.mlr.press/v238/el-halabi24a.html>.

666 [Eur22] European Union FRA. *Bias in Algorithms — Artificial Intelligence and Dis-*  
667 *crimination*. Luxembourg: European Union Agency for Fundamental Rights.  
668 Publications Office of the European Union, 2022.

669 [Fei98] Uriel Feige. “A Threshold of  $\ln n$  for Approximating Set Cover”. In: *J. ACM* 45.4  
670 (1998), pp. 634–652.

671 [FLNSZ22] Moran Feldman, Paul Liu, Ashkan Norouzi-Fard, Ola Svensson, and Rico Zen-  
672 klusen. “Streaming Submodular Maximization Under Matroid Constraints”. In:  
673 *ICALP*. Vol. 229. LIPIcs. Schloss Dagstuhl - Leibniz-Zentrum für Informatik,  
674 2022, 59:1–59:20.

675 [GHIM09] Michel X. Goemans, Nicholas J. A. Harvey, Satoru Iwata, and Vahab S. Mir-  
676 rokni. “Approximating submodular functions everywhere”. In: *Proceedings of*  
677 *the Twentieth Annual ACM-SIAM Symposium on Discrete Algorithms, SODA*  
678 *2009, New York, NY, USA, January 4-6, 2009*. Ed. by Claire Mathieu. SIAM,  
679 2009, pp. 535–544. DOI: 10 . 1137 / 1 . 9781611973068 . 59. URL: <https://doi.org/10.1137/1.9781611973068.59>.

680 [GJS21] Paritosh Garg, Linus Jordan, and Ola Svensson. “Semi-streaming Algorithms  
681 for Submodular Matroid Intersection”. In: *IPCO*. Vol. 12707. Lecture Notes in  
682 Computer Science. Springer, 2021, pp. 208–222.

683 [GK10] Ryan Gomes and Andreas Krause. “Budgeted Nonparametric Learning from Data  
684 Streams”. In: *ICML*. Omnipress, 2010, pp. 391–398.

685 [GK11] Daniel Golovin and Andreas Krause. “Adaptive Submodularity: Theory and  
686 Applications in Active Learning and Stochastic Optimization”. In: *J. Artif. Intell.*  
687 *Res.* 42 (2011), pp. 427–486.

688 [HK16] F Maxwell Harper and Joseph A Konstan. “The MovieLens datasets: History  
689 and context”. In: *ACM Transactions on Interactive Intelligent Systems (TiiS)* 5.4  
690 (2016), p. 19.

691 [Hoe63] Wassily Hoeffding. “Probability Inequalities for Sums of Bounded Random  
692 Variables”. In: *Journal of the American Statistical Association* 58.301 (1963),  
693 pp. 13–30. DOI: 10 . 1080/01621459 . 1963 . 10500830. URL: <https://doi.org/10.1080/01621459.1963.10500830>.

694 [KMGG08] Andreas Krause, H Brendan McMahan, Carlos Guestrin, and Anupam Gupta.  
695 “Robust submodular observation selection”. In: *Journal of Machine Learning*  
696 *Research* 9.Dec (2008), pp. 2761–2801.

697 [LB11] Hui Lin and Jeff A. Bilmes. “A Class of Submodular Functions for Document  
698 Summarization”. In: *ACL*. The Association for Computer Linguistics, 2011,  
699 pp. 510–520.

700 [LK14] Jure Leskovec and Andrej Krevl. *SNAP Datasets: Stanford Large Network*  
701 *Dataset Collection*. <http://snap.stanford.edu/data>. June 2014.

702 [LSV10] Jon Lee, Maxim Sviridenko, and Jan Vondrák. “Submodular maximization over  
703 multiple matroids via generalized exchange properties”. In: *Mathematics of*  
704 *Operations Research* 35.4 (2010), pp. 795–806.

705 [MBNTC17] Slobodan Mitrović, Ilija Bogunović, Ashkan Norouzi-Fard, Jakub Tarnawski, and  
706 Volkan Cevher. “Streaming Robust Submodular Maximization: A Partitioned  
707 Thresholding Approach”. In: *Advances in Neural Information Processing Systems*.  
708 2017.

712 [MCR14] Sérgio Moro, Paulo Cortez, and Paulo Rita. “A data-driven approach to predict  
713 the success of bank telemarketing”. In: *Decis. Support Syst.* 62 (2014), pp. 22–31.

714 [MMD16] Cecilia Munoz, Smith Megan, and DJ Patil. *Big data: A report on algorithmic  
715 systems, opportunity, and civil rights*. Washington, DC: Executive Office of the  
716 President. The White House, 2016.

717 [Mon95] Burt L Monroe. “Fully proportional representation”. In: *American Political Sci-  
718 ence Review* 89.4 (1995), pp. 925–940.

719 [NTMZMS18] Ashkan Norouzi-Fard, Jakub Tarnawski, Slobodan Mitrović, Amir Zandieh, Aida  
720 Mousavifar, and Ola Svensson. “Beyond 1/2-approximation for submodular  
721 maximization on massive data streams”. In: *ICML* (2018).

722 [Sch03a] Alexander Schrijver. *Combinatorial Optimization: Polyhedra and Efficiency*.  
723 Vol. B. Jan. 2003.

724 [Sch03b] Alexander Schrijver. *Combinatorial optimization. Polyhedra and efficiency*. Vol.  
725 B. Vol. 24. Algorithms and Combinatorics. Matroids, trees, stable sets, Chapters  
726 39–69. Springer-Verlag, Berlin, 2003, i–xxxiv and 649–1217. ISBN: 3-540-44389-  
727 4.

728 [TCSBHTBA01] Olga Troyanskaya, Michael Cantor, Gavin Sherlock, Pat Brown, Trevor Hastie,  
729 Robert Tibshirani, David Botstein, and Russ B Altman. “Missing value estimation  
730 methods for DNA microarrays”. In: *Bioinformatics* 17.6 (2001), pp. 520–525.

731 [TWRTZ19] Alan Tsang, Bryan Wilder, Eric Rice, Milind Tambe, and Yair Zick. “Group-  
732 Fairness in Influence Maximization”. In: *Proceedings of the Twenty-Eighth Inter-  
733 national Joint Conference on Artificial Intelligence, IJCAI-19*. International Joint  
734 Conferences on Artificial Intelligence Organization, July 2019, pp. 5997–6005.  
735 DOI: 10.24963/ijcai.2019/831. URL: [https://doi.org/10.24963/](https://doi.org/10.24963/ijcai.2019/831)  
736 [ijcai.2019/831](https://doi.org/10.24963/ijcai.2019/831).

737 [TY23] Shaojie Tang and Jing Yuan. “Beyond submodularity: a unified framework of  
738 randomized set selection with group fairness constraints”. In: *Journal of Combi-  
739 natorial Optimization* 45.4 (2023), p. 102.

740 [Udw18] Rajan Udwani. “Multi-objective maximization of monotone submodular functions  
741 with cardinality constraint”. In: *Advances in Neural Information Processing*  
742 *Systems* 31 (2018).

743 [Von13] Jan Vondrák. *Submodular Functions and Their Applications*. Plenary talk at  
744 the ACM-SIAM Symposium on Discrete Algorithms (SODA) 2013. 2013. URL:  
745 [https://theory.stanford.edu/~jvondrak/data/SODA-plenary-](https://theory.stanford.edu/~jvondrak/data/SODA-plenary-talk.pdf)  
746 [talk.pdf](https://theory.stanford.edu/~jvondrak/data/SODA-plenary-talk.pdf).

747 [Whi22] White House OSTP. *Blueprint for an AI Bill of Rights*. Washington, DC: White  
748 House Office of Science and Technology Policy, 2022.

749 [WLBW24] Yanhao Wang, Yuchen Li, Francesco Bonchi, and Ying Wang. “Balancing Utility  
750 and Fairness in Submodular Maximization”. In: *Proceedings of the 27th Inter-  
751 national Conference on Extending Database Technology, EDBT*. 2024, pp. 1–  
752 14.

753 [YT23] Jing Yuan and Shaojie Tang. “Group fairness in non-monotone submodular  
754 maximization”. In: *Journal of Combinatorial Optimization* 45.3 (2023), p. 88.

755 [ZVGG17] Muhammad Bilal Zafar, Isabel Valera, Manuel Gomez-Rodriguez, and Krishna  
756 P. Gummadi. “Fairness Constraints: Mechanisms for Fair Classification”. In:  
757 *AISTATS*. Vol. 54. Proceedings of Machine Learning Research. PMLR, 2017,  
758 pp. 962–970.

## NeurIPS Paper Checklist

### 1. Claims

Question: Do the main claims made in the abstract and introduction accurately reflect the paper's contributions and scope?

Answer: [\[Yes\]](#)

Guidelines:

- The answer NA means that the abstract and introduction do not include the claims made in the paper.
- The abstract and/or introduction should clearly state the claims made, including the contributions made in the paper and important assumptions and limitations. A No or NA answer to this question will not be perceived well by the reviewers.
- The claims made should match theoretical and experimental results, and reflect how much the results can be expected to generalize to other settings.
- It is fine to include aspirational goals as motivation as long as it is clear that these goals are not attained by the paper.

### 2. Limitations

Question: Does the paper discuss the limitations of the work performed by the authors?

Answer: [\[Yes\]](#)

Justification: Yes, particularly in Section 5.

Guidelines:

- The answer NA means that the paper has no limitation while the answer No means that the paper has limitations, but those are not discussed in the paper.
- The authors are encouraged to create a separate "Limitations" section in their paper.
- The paper should point out any strong assumptions and how robust the results are to violations of these assumptions (e.g., independence assumptions, noiseless settings, model well-specification, asymptotic approximations only holding locally). The authors should reflect on how these assumptions might be violated in practice and what the implications would be.
- The authors should reflect on the scope of the claims made, e.g., if the approach was only tested on a few datasets or with a few runs. In general, empirical results often depend on implicit assumptions, which should be articulated.
- The authors should reflect on the factors that influence the performance of the approach. For example, a facial recognition algorithm may perform poorly when image resolution is low or images are taken in low lighting. Or a speech-to-text system might not be used reliably to provide closed captions for online lectures because it fails to handle technical jargon.
- The authors should discuss the computational efficiency of the proposed algorithms and how they scale with dataset size.
- If applicable, the authors should discuss possible limitations of their approach to address problems of privacy and fairness.
- While the authors might fear that complete honesty about limitations might be used by reviewers as grounds for rejection, a worse outcome might be that reviewers discover limitations that aren't acknowledged in the paper. The authors should use their best judgment and recognize that individual actions in favor of transparency play an important role in developing norms that preserve the integrity of the community. Reviewers will be specifically instructed to not penalize honesty concerning limitations.

### 3. Theory assumptions and proofs

Question: For each theoretical result, does the paper provide the full set of assumptions and a complete (and correct) proof?

Answer: [\[Yes\]](#)

Guidelines:

- The answer NA means that the paper does not include theoretical results.
- All the theorems, formulas, and proofs in the paper should be numbered and cross-referenced.
- All assumptions should be clearly stated or referenced in the statement of any theorems.
- The proofs can either appear in the main paper or the supplemental material, but if they appear in the supplemental material, the authors are encouraged to provide a short proof sketch to provide intuition.
- Inversely, any informal proof provided in the core of the paper should be complemented by formal proofs provided in appendix or supplemental material.
- Theorems and Lemmas that the proof relies upon should be properly referenced.

#### 4. Experimental result reproducibility

Question: Does the paper fully disclose all the information needed to reproduce the main experimental results of the paper to the extent that it affects the main claims and/or conclusions of the paper (regardless of whether the code and data are provided or not)?

Answer: [\[Yes\]](#)

Justification: Yes, we provide the full source code in the supplementary material, zipped together with all relevant datasets for ease of execution. We will also open-source release the code together with the camera-ready version.

Guidelines:

- The answer NA means that the paper does not include experiments.
- If the paper includes experiments, a No answer to this question will not be perceived well by the reviewers: Making the paper reproducible is important, regardless of whether the code and data are provided or not.
- If the contribution is a dataset and/or model, the authors should describe the steps taken to make their results reproducible or verifiable.
- Depending on the contribution, reproducibility can be accomplished in various ways. For example, if the contribution is a novel architecture, describing the architecture fully might suffice, or if the contribution is a specific model and empirical evaluation, it may be necessary to either make it possible for others to replicate the model with the same dataset, or provide access to the model. In general, releasing code and data is often one good way to accomplish this, but reproducibility can also be provided via detailed instructions for how to replicate the results, access to a hosted model (e.g., in the case of a large language model), releasing of a model checkpoint, or other means that are appropriate to the research performed.
- While NeurIPS does not require releasing code, the conference does require all submissions to provide some reasonable avenue for reproducibility, which may depend on the nature of the contribution. For example
  - (a) If the contribution is primarily a new algorithm, the paper should make it clear how to reproduce that algorithm.
  - (b) If the contribution is primarily a new model architecture, the paper should describe the architecture clearly and fully.
  - (c) If the contribution is a new model (e.g., a large language model), then there should either be a way to access this model for reproducing the results or a way to reproduce the model (e.g., with an open-source dataset or instructions for how to construct the dataset).
  - (d) We recognize that reproducibility may be tricky in some cases, in which case authors are welcome to describe the particular way they provide for reproducibility. In the case of closed-source models, it may be that access to the model is limited in some way (e.g., to registered users), but it should be possible for other researchers to have some path to reproducing or verifying the results.

#### 5. Open access to data and code

Question: Does the paper provide open access to the data and code, with sufficient instructions to faithfully reproduce the main experimental results, as described in supplemental material?

Answer: [Yes]

Justification: Yes, we provide the full source code in the supplementary material, zipped together with all relevant datasets for ease of execution. We will also open-source release the code together with the camera-ready version.

Guidelines:

- The answer NA means that paper does not include experiments requiring code.
- Please see the NeurIPS code and data submission guidelines (<https://nips.cc/public/guides/CodeSubmissionPolicy>) for more details.
- While we encourage the release of code and data, we understand that this might not be possible, so “No” is an acceptable answer. Papers cannot be rejected simply for not including code, unless this is central to the contribution (e.g., for a new open-source benchmark).
- The instructions should contain the exact command and environment needed to run to reproduce the results. See the NeurIPS code and data submission guidelines (<https://nips.cc/public/guides/CodeSubmissionPolicy>) for more details.
- The authors should provide instructions on data access and preparation, including how to access the raw data, preprocessed data, intermediate data, and generated data, etc.
- The authors should provide scripts to reproduce all experimental results for the new proposed method and baselines. If only a subset of experiments are reproducible, they should state which ones are omitted from the script and why.
- At submission time, to preserve anonymity, the authors should release anonymized versions (if applicable).
- Providing as much information as possible in supplemental material (appended to the paper) is recommended, but including URLs to data and code is permitted.

## 6. Experimental setting/details

Question: Does the paper specify all the training and test details (e.g., data splits, hyper-parameters, how they were chosen, type of optimizer, etc.) necessary to understand the results?

Answer: [Yes]

Guidelines:

- The answer NA means that the paper does not include experiments.
- The experimental setting should be presented in the core of the paper to a level of detail that is necessary to appreciate the results and make sense of them.
- The full details can be provided either with the code, in appendix, or as supplemental material.

## 7. Experiment statistical significance

Question: Does the paper report error bars suitably and correctly defined or other appropriate information about the statistical significance of the experiments?

Answer: [Yes]

Justification: Yes, we report sample standard deviation error bars in the plots (and in the result files in the supplementary material). These correspond to the randomness used by the algorithm.

Guidelines:

- The answer NA means that the paper does not include experiments.
- The authors should answer "Yes" if the results are accompanied by error bars, confidence intervals, or statistical significance tests, at least for the experiments that support the main claims of the paper.
- The factors of variability that the error bars are capturing should be clearly stated (for example, train/test split, initialization, random drawing of some parameter, or overall run with given experimental conditions).
- The method for calculating the error bars should be explained (closed form formula, call to a library function, bootstrap, etc.)

- The assumptions made should be given (e.g., Normally distributed errors).
- It should be clear whether the error bar is the standard deviation or the standard error of the mean.
- It is OK to report 1-sigma error bars, but one should state it. The authors should preferably report a 2-sigma error bar than state that they have a 96% CI, if the hypothesis of Normality of errors is not verified.
- For asymmetric distributions, the authors should be careful not to show in tables or figures symmetric error bars that would yield results that are out of range (e.g. negative error rates).
- If error bars are reported in tables or plots, The authors should explain in the text how they were calculated and reference the corresponding figures or tables in the text.

## 8. Experiments compute resources

Question: For each experiment, does the paper provide sufficient information on the computer resources (type of compute workers, memory, time of execution) needed to reproduce the experiments?

Answer: [Yes]

Justification: The experiments can be run on commodity hardware (CPU only, single-threaded) and take several hours to finish. We mention this in Section 4.

Guidelines:

- The answer NA means that the paper does not include experiments.
- The paper should indicate the type of compute workers CPU or GPU, internal cluster, or cloud provider, including relevant memory and storage.
- The paper should provide the amount of compute required for each of the individual experimental runs as well as estimate the total compute.
- The paper should disclose whether the full research project required more compute than the experiments reported in the paper (e.g., preliminary or failed experiments that didn't make it into the paper).

## 9. Code of ethics

Question: Does the research conducted in the paper conform, in every respect, with the NeurIPS Code of Ethics <https://neurips.cc/public/EthicsGuidelines>?

Answer: [Yes]

Guidelines:

- The answer NA means that the authors have not reviewed the NeurIPS Code of Ethics.
- If the authors answer No, they should explain the special circumstances that require a deviation from the Code of Ethics.
- The authors should make sure to preserve anonymity (e.g., if there is a special consideration due to laws or regulations in their jurisdiction).

## 10. Broader impacts

Question: Does the paper discuss both potential positive societal impacts and negative societal impacts of the work performed?

Answer: [Yes]

Justification: Yes, in Section 5.

Guidelines:

- The answer NA means that there is no societal impact of the work performed.
- If the authors answer NA or No, they should explain why their work has no societal impact or why the paper does not address societal impact.
- Examples of negative societal impacts include potential malicious or unintended uses (e.g., disinformation, generating fake profiles, surveillance), fairness considerations (e.g., deployment of technologies that could make decisions that unfairly impact specific groups), privacy considerations, and security considerations.

- The conference expects that many papers will be foundational research and not tied to particular applications, let alone deployments. However, if there is a direct path to any negative applications, the authors should point it out. For example, it is legitimate to point out that an improvement in the quality of generative models could be used to generate deepfakes for disinformation. On the other hand, it is not needed to point out that a generic algorithm for optimizing neural networks could enable people to train models that generate Deepfakes faster.
- The authors should consider possible harms that could arise when the technology is being used as intended and functioning correctly, harms that could arise when the technology is being used as intended but gives incorrect results, and harms following from (intentional or unintentional) misuse of the technology.
- If there are negative societal impacts, the authors could also discuss possible mitigation strategies (e.g., gated release of models, providing defenses in addition to attacks, mechanisms for monitoring misuse, mechanisms to monitor how a system learns from feedback over time, improving the efficiency and accessibility of ML).

## 11. Safeguards

Question: Does the paper describe safeguards that have been put in place for responsible release of data or models that have a high risk for misuse (e.g., pretrained language models, image generators, or scraped datasets)?

Answer: [NA]

Guidelines:

- The answer NA means that the paper poses no such risks.
- Released models that have a high risk for misuse or dual-use should be released with necessary safeguards to allow for controlled use of the model, for example by requiring that users adhere to usage guidelines or restrictions to access the model or implementing safety filters.
- Datasets that have been scraped from the Internet could pose safety risks. The authors should describe how they avoided releasing unsafe images.
- We recognize that providing effective safeguards is challenging, and many papers do not require this, but we encourage authors to take this into account and make a best faith effort.

## 12. Licenses for existing assets

Question: Are the creators or original owners of assets (e.g., code, data, models), used in the paper, properly credited and are the license and terms of use explicitly mentioned and properly respected?

Answer: [Yes]

Guidelines:

- The answer NA means that the paper does not use existing assets.
- The authors should cite the original paper that produced the code package or dataset.
- The authors should state which version of the asset is used and, if possible, include a URL.
- The name of the license (e.g., CC-BY 4.0) should be included for each asset.
- For scraped data from a particular source (e.g., website), the copyright and terms of service of that source should be provided.
- If assets are released, the license, copyright information, and terms of use in the package should be provided. For popular datasets, [paperswithcode.com/datasets](https://paperswithcode.com/datasets) has curated licenses for some datasets. Their licensing guide can help determine the license of a dataset.
- For existing datasets that are re-packaged, both the original license and the license of the derived asset (if it has changed) should be provided.
- If this information is not available online, the authors are encouraged to reach out to the asset's creators.

## 13. New assets



1019 Question: Are new assets introduced in the paper well documented and is the documentation  
 1020 provided alongside the assets?

1021 Answer: [NA]

1022 Justification: We release no new assets (except code, which is discussed elsewhere).

1023 Guidelines:

- 1024 • The answer NA means that the paper does not release new assets.
- 1025 • Researchers should communicate the details of the dataset/code/model as part of their  
 1026 submissions via structured templates. This includes details about training, license,  
 1027 limitations, etc.
- 1028 • The paper should discuss whether and how consent was obtained from people whose  
 1029 asset is used.
- 1030 • At submission time, remember to anonymize your assets (if applicable). You can either  
 1031 create an anonymized URL or include an anonymized zip file.

1032 **14. Crowdsourcing and research with human subjects**

1033 Question: For crowdsourcing experiments and research with human subjects, does the paper  
 1034 include the full text of instructions given to participants and screenshots, if applicable, as  
 1035 well as details about compensation (if any)?

1036 Answer: [NA]

1037 Guidelines:

- 1038 • The answer NA means that the paper does not involve crowdsourcing nor research with  
 1039 human subjects.
- 1040 • Including this information in the supplemental material is fine, but if the main contribu-  
 1041 tion of the paper involves human subjects, then as much detail as possible should be  
 1042 included in the main paper.
- 1043 • According to the NeurIPS Code of Ethics, workers involved in data collection, curation,  
 1044 or other labor should be paid at least the minimum wage in the country of the data  
 1045 collector.

1046 **15. Institutional review board (IRB) approvals or equivalent for research with human**  
 1047 **subjects**

1048 Question: Does the paper describe potential risks incurred by study participants, whether  
 1049 such risks were disclosed to the subjects, and whether Institutional Review Board (IRB)  
 1050 approvals (or an equivalent approval/review based on the requirements of your country or  
 1051 institution) were obtained?

1052 Answer: [NA]

1053 Guidelines:

- 1054 • The answer NA means that the paper does not involve crowdsourcing nor research with  
 1055 human subjects.
- 1056 • Depending on the country in which research is conducted, IRB approval (or equivalent)  
 1057 may be required for any human subjects research. If you obtained IRB approval, you  
 1058 should clearly state this in the paper.
- 1059 • We recognize that the procedures for this may vary significantly between institutions  
 1060 and locations, and we expect authors to adhere to the NeurIPS Code of Ethics and the  
 1061 guidelines for their institution.
- 1062 • For initial submissions, do not include any information that would break anonymity (if  
 1063 applicable), such as the institution conducting the review.

1064 **16. Declaration of LLM usage**

1065 Question: Does the paper describe the usage of LLMs if it is an important, original, or  
 1066 non-standard component of the core methods in this research? Note that if the LLM is used  
 1067 only for writing, editing, or formatting purposes and does not impact the core methodology,  
 1068 scientific rigorousness, or originality of the research, declaration is not required.

1069 Answer: [NA]

1070 Guidelines:

- 1071 • The answer NA means that the core method development in this research does not
- 1072 involve LLMs as any important, original, or non-standard components.
- 1073 • Please refer to our LLM policy (<https://neurips.cc/Conferences/2025/LLM>)
- 1074 for what should or should not be described.
