# Supplementary material
Source: ML conference proceedings conference paper supplement (https://openreview.net/forum?id=gfGLEtWAqV)
Supplement: supplementary_material [file neurips 2025 submission.pdf › neurips/neurips 2025 submission.pdf]

---

# Improved Algorithms for Fair Matroid Submodular Maximization

---

Anonymous Author(s)

Affiliation

Address

email

## Abstract

1 Submodular maximization subject to matroid constraints is a central problem with  
2 many applications in machine learning. As algorithms are increasingly used in  
3 decision-making over datapoints with sensitive attributes such as gender or race, it  
4 is becoming crucial to enforce fairness to avoid bias and discrimination. Recent  
5 work has addressed the challenge of developing efficient approximation algorithms  
6 for fair matroid submodular maximization. However, the best algorithms known so  
7 far are only guaranteed to satisfy a relaxed version of the fairness constraints that  
8 loses a factor 2, i.e., the problem may ask for  $\ell$  elements with a given attribute, but  
9 the algorithm is only guaranteed to find  $\lfloor \ell/2 \rfloor$ . In particular, there is no provable  
10 guarantee when  $\ell = 1$ , which corresponds to a key special case of perfect matching.  
11 In this work, we achieve a new trade-off via an algorithm that gets arbitrarily close  
12 to full fairness. Namely, for any constant  $\varepsilon > 0$ , we give a constant-factor approx-  
13 imation to fair monotone matroid submodular maximization that in expectation  
14 loses only a factor  $(1 - \varepsilon)$  in the lower-bound fairness constraint. Our empirical  
15 evaluation on a standard suite of real-world datasets – clustering, recommendation,  
16 and coverage tasks – demonstrates the practical effectiveness of our methods.

## 17 1 Introduction

18 Machine learning is increasingly deployed in high-stakes decision-making, raising concerns about  
19 the propagation of bias and unfairness in automated systems. These challenges are especially acute  
20 in domains such as education, law enforcement, hiring, and credit [MMD16; Whi22; Eur22]. In  
21 response, a growing body of research has focused on developing algorithms that incorporate fairness  
22 constraints for core problems including clustering [CKLV17], data summarization [CKSDKV18],  
23 classification [ZVGG17], voting [CHV18], and ranking [CSV18].

24 This paper studies fairness in the context of monotone submodular maximization subject to matroid  
25 constraints. Submodular functions, which capture the principle of diminishing returns, are funda-  
26 mental to a range of machine learning applications such as recommender systems [EG11], feature  
27 selection [DK11], active learning [GK11], and data summarization [LB11]. Matroids provide a  
28 general framework for modeling independence constraints, encompassing cardinality, partition, graph  
29 connectivity, and linear independence constraints.

30 While numerous fairness definitions have been proposed, we adopt a widely used group fairness  
31 model [CHV18; CKSDKV18; CSV18; CKLV17; CKLV19; EMNTT20; EFNTT23; ETNV24], which  
32 partitions the universe into *disjoint* groups and enforces *lower and upper* bounds on the representation  
33 of each sensitive group in the selected set. See Section 2.1 for a precise definition. This model  
34 generalizes several fairness notions, such as proportional representation [Mon95; BLS17], diversity  
35 constraints [CCRL13; Bid06], and statistical parity [DHPRZ12].

In the absence of fairness constraints, monotone submodular maximization under a single matroid constraint is very well understood, as a tight  $(1 - 1/e) \approx 0.63$ -approximation is achievable [CCPV11; Fei98]. The intersection of two matroid constraints (which we refer to as “matroid intersection”) admits an almost 0.5-approximation [LSV10]. The fair variant has been primarily explored under cardinality constraints [CHV18], where a tight  $(1 - 1/e)$ -approximation is also known. In the (single-pass) streaming setting, there is a 0.3178-approximation [FLNSZ22] for the non-fair matroid version; furthermore, since the intersection of cardinality constraint and fairness can be reduced to a single matroid constraint [EMNTT20], the same approximation factor can be obtained for it.

However, the intersection of a matroid constraint and a fairness constraint seems significantly more challenging, and is still poorly understood despite two recent works devoted to studying this problem in the streaming [EFNTT23] and the classic offline [ETNV24] settings; our focus is on the latter. Following [EFNTT23], we refer to the problem as Fair Matroid Monotone Submodular Maximization (**FMMSM**). To appreciate its difficulty, consider a key special case, Monotone Submodular Perfect Matching (**MSPM**), i.e., maximizing a monotone submodular function over the collection of all *perfect* matchings in a *bipartite* graph  $(V_G, E_G)$ .<sup>1</sup> This collection of feasible sets is not downward-closed, which invalidates known algorithmic approaches.<sup>2</sup> The best known approximation factor for MSPM is a trivial  $O(|V_G|)$ -approximation; one can also apply the framework of [GHIM09] to obtain an  $\tilde{O}(\sqrt{|E_G|})$ -approximation, which is superior for sparse graphs. In fact, this could possibly even be tight, as it almost matches a surprising negative result of [ETNV24] who showed a family of sparse graphs where the standard *multilinear relaxation* (commonly used in relax-and-round approaches for submodular optimization) has an integrality gap of  $\Omega(\sqrt{|E_G|})$ . The existence of a constant-factor approximation to MSPM was posed by [ETNV24] as an exciting open problem.

The algorithms given in [EFNTT23; ETNV24] for FMMSM circumvent the difficulty posed by the lower bound constraints by relaxing them. They obtain the following two results:

**Theorem 1.1 (Two-pass algorithm of [EFNTT23])** *There is a polynomial-time algorithm for FMMSM that violates lower bound constraints by a factor 2 and obtains  $\alpha/2$ -approximation, where  $\alpha$  is the approximation ratio of an algorithm for maximizing a monotone submodular function under a matroid intersection constraint.*

We can have  $\alpha$  be almost  $1/2$  [LSV10] and thus get an almost  $1/4$ -approximation. ([EFNTT23] work in the streaming setting and instead use the streaming algorithm for matroid intersection of [GJS21]; this results in a  $1/11.66$ -approximation in two passes.) Here, violating lower bound constraints by a factor 2 means that, if a color has a lower bound of  $\ell$ , the solution is guaranteed to have at least  $\lfloor \ell/2 \rfloor$  elements of that color. Note that in MSPM we have  $\ell = 1$  and thus  $\lfloor \ell/2 \rfloor = 0$ .

**Theorem 1.2 ([ETNV24])** *There is a polynomial-time algorithm for FMMSM that satisfies lower and upper bound constraints in expectation rather than exactly, and obtains a  $(1 - 1/e)$ -approximation in expectation.*

Theorem 1.2 also guarantees certain two-sided tail bounds on the violation of each fairness constraint which apply if  $\ell$  is large enough. It is the only algorithm considered in this paper that violates the *upper* bounds. The algorithm proceeds by solving and rounding the multilinear relaxation.

If we consider a relaxed version of MSPM where instead of a *perfect* matching we want a *large* matching that also has high submodular function value, then a simple greedy algorithm will yield a  $1/3$ -approximation (Theorem 2.5) and construct a maximal matching, thus getting  $1/2$  of the maximum possible size. The results in Theorems 1.1 and 1.2 give no improvement upon this. While one can try to generalize this simple approach to FMMSM, it faces another issue that is salient in the context of fairness motivations: while at least half of the total lower bound mass will be satisfied, there could be “unlucky” colors (marginalized groups) that never get represented in the solution; this is precisely the reason why we seek fair algorithms in the first place.

<sup>1</sup>To see why MSPM is a special case of FMMSM, set  $E_G$  as the universe, consider a partition matroid that encodes that every vertex on the left shall have degree at most 1 in the solution, and set fairness constraints so that every vertex on the right shall have degree at least 1 and at most 1.

<sup>2</sup>Of course, a proper subset of a perfect matching is not a perfect matching. But more importantly, the collection of all *subsets of perfect matchings* (which is downward-closed) does not belong to any of the families that are known to make approximate submodular maximization tractable. In particular, it is not a matroid, an intersection of few matroids, or a so-called  $p$ -extendible set system or a  $p$ -system [CCPV11] for  $p = O(1)$ .

## 83 1.1 Our contributions

84 In this work we provide an algorithm that satisfies the fairness constraints within a factor better than  
 85 2, while also giving guarantees for every individual group rather than only in aggregate. To achieve  
 86 the former, we trade off part of the objective value; to achieve the latter, we employ randomization.

87 **Theorem 1.3 (informal version of Theorem 3.4)** *For every  $\varepsilon \in (0, 1)$  there is a polynomial-time*  
 88 *algorithm for FMMSM whose output*

- 89 • *satisfies the matroid constraint,*
- 90 • *satisfies fairness upper bound constraints,*
- 91 • *for a group with fairness lower bound  $\ell$ , has in expectation at least  $(1 - \varepsilon)\ell$  elements from*  
 92 *that group,*
- 93 • *has expected size at least  $(1 - \varepsilon)$  times the maximum size of any feasible solution,*
- 94 • *satisfies Chernoff-style high-probability bounds on size, as well as total fairness violation,*
- 95 • *has expected submodular function value at least  $0.499 \cdot \varepsilon \cdot \text{OPT}$ .*

96 Our bound on the submodular function value is actually shown with respect to a more powerful  
 97 optimum, namely, an optimal set that satisfies the matroid and upper-bound constraints, but not  
 98 necessarily the lower-bound constraints. If one wants to compare to this optimum, then the  $O(\varepsilon)$   
 99 factor loss in value is unavoidable. To see this, consider MSPM in a graph  $P_3 \times N$  consisting of a  
 100 disjoint union of  $N$  paths of length 3, with a linear objective function assigning values 0, 1, 0 to each  
 101 path’s edges. A perfect matching of size  $2N$  has 0 value, and a maximal matching of size  $N$  has  
 102 value  $N$ ; one can interpolate between these smoothly.

103 As a second contribution, we also employ our techniques to obtain a deterministic algorithm. There are  
 104 several variants that we could formulate; we choose to show a general setting of matroid intersection,  
 105 where the trade-off is between size and objective value. The relation to fairness is that an algorithm  
 106 that finds a solution of maximum size that is an  $\alpha$ -approximation to the objective value would imply  
 107 an  $\alpha$ -approximation algorithm for FMMSM (see [EFNTT23], Proposition C.6).

108 **Theorem 1.4** *For every  $\varepsilon \in (0, 1)$  there is a deterministic polynomial-time algorithm for the problem*  
 109 *of maximizing a monotone submodular function subject to two matroid constraints whose output*  
 110 *has size at least  $(1 - \varepsilon)$  times the maximum size of any feasible solution minus one, and obtains a*  
 111  *$(0.499 \cdot \varepsilon)$ -approximation to the submodular function value.*

112 **Experimental results.** We show the effectiveness of our algorithm empirically against prior work  
 113 and natural baselines on a suite of standard benchmarks. We measure the submodular objective  
 114 value and total fairness violation. Our algorithms produce solutions whose value is competitive with  
 115 the highest-value baseline, which completely ignores the lower bound constraints and accordingly  
 116 has the highest fairness violations. In two out of three scenarios, our algorithms dominate prior  
 117 work [EFNTT23]. Finally, a key strength of our approach is the flexibility given by  $\varepsilon$ , allowing users  
 118 to tune the balance between utility and fairness.

119 **Our techniques.** Let us begin with the simple setting of perfect matchings (MSPM). Consider the  
 120 symmetric difference of a high-value matching  $Y$  and a perfect matching  $P$ . This decomposes into a  
 121 collection of vertex-disjoint alternating cycles and augmenting paths.

122 One possible algorithm is to ignore the cycles, and choose some of the augmenting paths to apply to  
 123  $Y$ , so that its size grows to at least  $(1 - \varepsilon)|P|$ . We can do this by computing the marginal contribution  
 124 of the elements that  $Y$  would lose in each path, and taking the least damaging paths; by submodularity,  
 125 this loses at most a  $(1 - \varepsilon)$  fraction of value in  $Y$ .

126 While this does ensure a large matching, some  $\varepsilon$  fraction of vertices can still be “unlucky” and end  
 127 up unmatched. Deterministically this would be hard to avoid (short of solving MSPM/FMMSM  
 128 completely, with no fairness violation); our next idea is to choose the paths randomly in the above  
 129 solution. This will work for MSPM, as long as we take care to select a  $(1 - \varepsilon)$  fraction of the  $|P| - |Y|$   
 130 many augmenting paths, even if we already have  $|Y| > (1 - \varepsilon)|P|$ . Then every vertex that was not  
 131 matched in  $Y$  has a  $(1 - \varepsilon)$  probability of being matched in the new solution.

132 However, there are two main challenges when trying to generalize the above approach to matroid  
 133 and fairness constraints. Firstly, having fairness bounds with  $\ell_c < u_c$  means that  $Y$  can have fewer  
 134 elements than  $P$  in some colors but more elements in other colors, and can even have  $|Y| = |P|$   
 135 while still violating many fairness lower bounds. This means that we need to find and apply not only  
 136 augmenting paths, but also alternating paths that exchange an element of an oversaturated color for  
 137 one of an undersaturated color, without increasing the solution size. We show that as long as the total  
 138 fairness violation is large, there are many such disjoint paths, which implies that applying a random  
 139 fraction of them still retains enough value.

140 The second, larger obstacle arises due to dealing with general matroids. We are able to use tools  
 141 from matroid theory to show the existence of many disjoint alternating or augmenting paths in an  
 142 appropriate matroid intersection exchange graph whose vertices correspond to elements of  $Y$  and  $P$   
 143 (which were edges in the case of MSPM). We need to carefully refine the paths via an asymmetric  
 144 shortcutting process to ensure that applying them leaves the solution independent in the matroid while  
 145 also not disrupting the counts of elements in the colors not being exchanged. Moreover, in general,  
 146 multiple augmenting paths in matroids cannot be applied simultaneously. We deal with this using an  
 147 iterative framework where we apply a single path, rebuild the exchange graph, and find a new large  
 148 collection of disjoint paths; we then bound the loss in value after each step.

149 **Paper organization.** In Section 2 we introduce all necessary notation, definitions, and useful facts.  
 150 In Section 3 we describe our algorithms and prove their properties. Section 4 is devoted to the  
 151 experimental evaluation. We conclude and discuss the limitations and broader impact of our work in  
 152 Section 5. Additional related work is discussed in Section 1.3 in the full version (in the supplementary  
 153 materials), which also contains all omitted content and skipped proofs.

## 154 2 Preliminaries

155 We denote the symmetric difference  $(X \setminus Y) \cup (Y \setminus X)$  of two sets  $X$  and  $Y$  by  $X \Delta Y$ .

156 **Submodular functions.** We consider functions  $f : 2^V \rightarrow \mathbb{R}_+$  defined on a ground set  $V$ . We say that  
 157  $f$  is *submodular* if  $f(Y \cup \{e\}) - f(Y) \geq f(X \cup \{e\}) - f(X)$  for any two sets  $Y \subseteq X \subseteq V$  and  
 158 any element  $e \in V \setminus X$ . Moreover,  $f$  is *monotone* if  $f(Y) \leq f(X)$  for any two sets  $Y \subseteq X \subseteq V$ .  
 159 We assume that  $f$  is given as an oracle that computes  $f(S)$  for given  $S \subseteq V$ ; we consider the running  
 160 time of this oracle to be  $O(1)$ .

161 The following fact is folklore. We provide a proof in the full version (see the supplementary material).

162 **Fact 2.1** *Let  $f$  be a non-negative submodular function and  $X_1, X_2, \dots, X_k \subseteq X$  be disjoint subsets*  
 163 *of  $X$ . Then*

$$\sum_{i=1}^k f(X \setminus X_i) \geq (k-1)f(X).$$

165 **Matroids.** A *matroid* is a set family  $\mathcal{I} \subseteq 2^V$  with the properties:

- 166 • *Downward-closedness:* if  $X \subseteq Y$  and  $Y \in \mathcal{I}$ , then  $X \in \mathcal{I}$ ;
- 167 • *Augmentation:* if  $X, Y \in \mathcal{I}$  and  $|X| < |Y|$ , then there exists  $e \in Y$  with  $X + e \in \mathcal{I}$ .

168 We abbreviate  $X \cup \{e\}$  as  $X + e$  and  $X \setminus \{e\}$  as  $X - e$ . We assume that the matroid is given as an  
 169 oracle that, for a given  $S \subseteq V$ , answers whether  $S \in \mathcal{I}$ ; we consider the running time of this oracle  
 170 to be  $O(1)$ . We say that a set  $S \subseteq V$  is *independent* if  $S \in \mathcal{I}$ .

171 **Matroid exchange graph.** Let  $\mathcal{I}$  be a matroid on universe  $V$  and  $Y, Z$  be two independent sets.

172 **Definition 2.2** *We define the exchange graph for  $Y$  and  $Z$  with respect to  $\mathcal{I}$  as the bipartite graph*

$$(Y \setminus Z, Z \setminus Y, \{(y, z) : Y - y + z \in \mathcal{I}\}).$$

173 **Lemma 2.3 ([Sch03], Corollary 39.12a)** *If  $|Y| = |Z|$ , then the exchange graph for  $Y$  and  $Z$  with*  
 174 *respect to  $\mathcal{I}$  contains a perfect matching.*

## 2.1 Fair Matroid Monotone Submodular Maximization (FMMSM)

The universe  $V$  is partitioned into  $C$  sets:  $V = V_1 \cup V_2 \cup \dots \cup V_C$ , where  $V_c$  denotes elements of color  $c$ . Every element has exactly one color. The set of colors is denoted by  $[C] = \{1, 2, \dots, C\}$ . For every color  $c \in [C]$  we have *fairness bounds*: lower bound  $\ell_c$  and upper bound  $u_c$ .

The set of upper bounds gives rise to a *partition matroid* that we will denote by  $\mathcal{U}$ . That is,

$$\mathcal{U} = \{S \subseteq V \mid |S \cap V_c| \leq u_c \ \forall c \in [C]\}.$$

It is well-known that such a collection of sets forms a matroid. We will call a set  $S \in \mathcal{U}$  *upper-fair*.

If a set satisfies both the lower and the upper bounds, we say that it is *fair*. That is, we define the family of fair sets  $\mathcal{C}$  as follows:

$$\mathcal{C} = \{S \subseteq V \mid \ell_c \leq |S \cap V_c| \leq u_c \ \forall c \in [C]\}.$$

The FMMSM problem asks to find a set  $S \in \mathcal{I} \cap \mathcal{C}$  (i.e., fair and independent  $S$ ) that maximizes  $f(S)$ . We use  $\text{OPT}$  for the optimal value, i.e.,  $\text{OPT} = \max_{S \in \mathcal{I} \cap \mathcal{C}} f(S)$ . We assume that there exists a fair and independent set, i.e.,  $\mathcal{I} \cap \mathcal{C} \neq \emptyset$ . We say that an algorithm is an  $\alpha$ -approximation if it outputs a set  $S$  with  $f(S) \geq \alpha \cdot \text{OPT}$ .

For any set  $S \subseteq V$  we define its *fairness violation*  $\text{fav}(S) := \sum_c \max\{|S \cap V_c| - u_c, \ell_c - |S \cap V_c|, 0\}$ . Note that if  $S$  is upper-fair, then  $\text{fav}(S) = \sum_c \max\{\ell_c - |S \cap V_c|, 0\}$ .

**Lemma 2.4 ([EFNTT23], Appendix C)** *There is an exact polynomial-time algorithm for FMMSM for the case when  $f$  is a linear function.*

**Matroid intersection.** Given two matroids and a monotone submodular function  $f$  defined on  $V$ , we can define the problem of maximizing a submodular function subject to a matroid intersection constraint similarly to FMMSM. In particular, if we ignore the lower bounds completely, FMMSM turns into the above matroid intersection problem for matroids  $\mathcal{I}$  and  $\mathcal{U}$ .

**Theorem 2.5 ([CCPV11])** *The greedy algorithm gives a  $1/3$ -approximation to this problem.*

**Theorem 2.6 ([LSV10])** *For any  $\delta > 0$  there is a polynomial-time algorithm that gives a  $(0.5 - \delta)$ -approximation to this problem.*

## 3 Our algorithm

In this section we describe our algorithms: randomized (Theorem 3.4) and deterministic (Section 3.1). We first need to introduce some notions. The proof of Theorem 3.4 will begin by constructing a maximum-cardinality independent and fair set  $P$ , which will stay unchanged throughout the execution. We also construct an independent and upper-fair set  $Y$  of high  $f$ -value. We will use  $P$  as a source of fairness and iteratively trade off  $Y$ 's value for  $P$ 's elements in colors that are undersaturated by  $Y$ .

**Definition 3.1** *Given  $Y$  and  $P$  as above, we say that a color  $c \in [C]$  is undersaturated if  $|Y \cap V_c| < |P \cap V_c|$ , and oversaturated if  $|Y \cap V_c| > |P \cap V_c|$ .*

The technical crux of the proof of Theorem 3.4 is Lemma 3.3, in which we show the existence of many disjoint structures, each of which can be used to advance our fairness objective.

**Definition 3.2** *Let  $Y$  be an independent and upper-fair set, and let  $X \subseteq V$ . Define the result  $Y'$  of applying  $X$  to  $Y$  as the symmetric difference  $Y' = Y \triangle X$ . We say that  $X$  is alternating (with respect to  $Y$ ) if  $Y'$  is independent ( $Y' \in \mathcal{I}$ ) and there is exactly one undersaturated color  $c' \in [C]$  and one oversaturated color  $c'' \in [C]$  such that for all  $c \in [C]$ ,*

$$|Y' \cap V_c| = |Y \cap V_c| + \begin{cases} 1 & \text{for } c = c', \\ -1 & \text{for } c = c'', \\ 0 & \text{for } c \neq c', c''. \end{cases}$$

*We say that  $X$  is augmenting if all the above conditions are satisfied, except that there is no color  $c''$ . In both cases, we say that  $X$  increases  $c'$ .*

214 Note that we have  $|Y'| = |Y|$  if  $X$  is alternating and  $|Y'| = |Y| + 1$  if  $X$  is augmenting. Also,  $Y'$  is  
 215 upper-fair, since the only color where it has more elements than  $Y$  is  $c'$ , and we have  $|Y' \cap V_{c'}| =$   
 216  $|Y \cap V_{c'}| + 1 < |P \cap V_{c'}| + 1$  (and  $P$  is fair).

217 **Lemma 3.3** *Let  $Y$  and  $P$  be two independent and upper-fair sets with  $|Y| \leq |P|$ . Denote*

$$k = \sum_{c \in [C]} \max(0, |P \cap V_c| - |Y \cap V_c|).$$

218 *Then we may find in polynomial time a collection  $X_1, \dots, X_k$  of disjoint subsets of  $Y \cup P$ , of which at*  
 219 *least  $|P| - |Y|$  many are augmenting and the rest are alternating. Moreover, for every undersaturated*  
 220 *color  $c$ , exactly  $|P \cap V_c| - |Y \cap V_c|$  many of the paths increase  $c$ .*

221 The full proof can be found in the full version (see the supplementary material).

222 *Proof sketch.* We consider the so-called (directed) matroid intersection exchange graph for  $Y$  and  
 223  $P$  with respect to  $\mathcal{I}$  and  $\mathcal{U}$ . Inside this graph we carefully construct a subgraph consisting of two  
 224 matchings  $M_{\leftarrow}$  and  $M_{\rightarrow}$ .  $M_{\leftarrow}$  is obtained by invoking Lemma 2.3 on a subgraph, whereas we  
 225 construct  $M_{\rightarrow}$  manually by matching elements of the same colors between  $Y$  and  $P$ . We then  
 226 algorithmically construct the  $k$  paths between appropriately defined sets of sources and sinks in  
 227  $M_{\leftarrow} \cup M_{\rightarrow}$ . Next, we carry out an asymmetric shortcutting process, whose aim is to make sure that  
 228 the new solution will be independent in the matroid, but also not disrupt the color structure. This  
 229 allows us to prove that the paths following this postprocessing satisfy Definition 3.2.  $\square$

230 **Theorem 3.4** *There is a randomized polynomial-time algorithm for FMMSM parametrized by*  
 231  *$\varepsilon \in (0, 1)$  that outputs a set  $S \in \mathcal{I} \cap \mathcal{U}$  (i.e., independent and upper-fair) such that*

- 232 •  $\mathbb{E}[|S|] \geq (1 - \varepsilon)N$  with a high-probability tail bound:  
 233 for  $\delta > 0$ ,  $\mathbb{P}[|S| < (1 - \delta)(1 - \varepsilon)N] \leq \exp(-\Omega_\delta(N))$
- 234 •  $\mathbb{E}[f(S)] \geq 0.499 \cdot \varepsilon \cdot \text{OPT}_{\text{MatInt}}$
- 235 • for every  $c \in [C]$  we have  $\mathbb{E}[|S \cap V_c|] \geq (1 - \varepsilon)\ell_c$
- 236 • with a high-probability tail bound on the total fairness violation:  
 237 for  $\delta > 0$ ,  $\mathbb{P}[\text{fav}(S) > (1 + \delta)\varepsilon \sum_c \ell_c] \leq \exp(-\Omega_\delta(\sum_c \ell_c))$

238 where  $N$  is the maximum size of a set in  $\mathcal{I} \cap \mathcal{U}$ , and  $\text{OPT}_{\text{MatInt}}$  is the maximum  $f$ -value of a set in  
 239  $\mathcal{I} \cap \mathcal{U}$  (clearly we have  $\text{OPT}_{\text{MatInt}} \geq \text{OPT}$  as  $C \subseteq \mathcal{U}$ ).

240 We stress that  $S$  is upper-fair with probability 1, not only in expectation. We also remark that one can  
 241 show a similar tail bound for every individual  $\ell_c$ , though the right-hand side  $\exp(-\Omega_\delta(\ell_c))$  may not  
 242 be meaningful unless  $\ell_c$  is large. On the other hand, no such bound can be shown for the  $f$ -value,  
 243 which in the worst case can be concentrated on a single element of the universe.

244 We give a brief sketch; the full proof can be found in the full version (see the supplementary material).

245 *Proof sketch of Theorem 3.4.* As the first step, we compute a maximum-cardinality fair and indepen-  
 246 dent set  $P$ , which may be done in polynomial time by Lemma 2.4. By invoking Lemma 3.3  
 247 we can show that  $|P| = N$ . As the second step, we compute a high-value independent and  
 248 upper-fair set  $Y_0$ . Using the algorithm of Theorem 2.6 ([LSV10]) (with  $\delta = 10^{-3}$ ) we get that  
 249  $f(Y_0) \geq 0.499 \cdot \text{OPT}_{\text{MatInt}}$ . We denote

$$k(Y) = \sum_{c \in [C]} \max(0, |P \cap V_c| - |Y \cap V_c|)$$

250 for any solution  $Y$ , and  $k := k(Y_0)$  to shorten notation. We will perform a number  $I$  of iterations  
 251 which will be  $(1 - \varepsilon)k$  in expectation. More precisely, let us set  $I = \lceil (1 - \varepsilon)k \rceil$  with probability  
 252  $(1 - \varepsilon)k - \lfloor (1 - \varepsilon)k \rfloor$ , and  $\lfloor (1 - \varepsilon)k \rfloor$  otherwise.

253 We perform  $I$  iterations. In the  $i$ -th iteration, we apply Lemma 3.3 to  $Y_{i-1}$  (and  $P$ ) to obtain a  
 254 collection  $X_i^1, \dots, X_i^{k(Y_{i-1})}$  of augmenting or alternating sets. We choose one of them,  $X_i$ , uniformly  
 255 at random, and apply it to obtain a new solution  $Y_i = Y_{i-1} \triangle X_i$ . Finally, we return  $S := Y_I$ .

256 All solutions  $Y_0, \dots, Y_I$  are independent and upper-fair. The properties of fairness lower bounds  
 257 intuitively follow because at every iteration one random fairness violation is removed, and the

number of iterations is  $\approx (1 - \varepsilon)$  times the initial number of fairness violations  $k = k(Y_0)$ . Since at least  $|P| - |Y_{i-1}|$  of the sets at iteration  $i$  are augmenting, the claim about the size of the solution follows similarly. We can also show tail bounds by invoking Chernoff-Hoeffding style bounds for hypergeometric distributions. As for the objective value, we prove that at every step, the expected loss is only a  $1/(k - i + 1)$  fraction of the current  $f$ -value, as we select randomly from among  $k - i + 1$  disjoint augmenting or alternating sets. After  $I \approx (1 - \varepsilon)k$  iterations we then end up with a telescoping product that simplifies to  $\frac{\varepsilon k}{k} f(Y_0)$ .  $\square$

### 3.1 Deterministic algorithm

Now we turn to our deterministic result, Theorem 1.4. It is powered by a lemma that is an analogue of Lemma 3.3. Their proofs are deferred to the full version (in the supplementary material).

**Lemma 3.5** *For any two matroids  $\mathcal{I}_1, \mathcal{I}_2$ , let  $Y, P \in \mathcal{I}_1 \cap \mathcal{I}_2$  be two sets in their intersection, with  $|Y| \leq |P|$ . Then we may find in polynomial time a collection  $X_1, \dots, X_{|P|-|Y|}$  of disjoint subsets of  $Y \cup P$  such that for each set  $X_i$  we have  $Y \triangle X_i \in \mathcal{I}_1 \cap \mathcal{I}_2$  and  $|Y \triangle X_i| = |Y| + 1$ .*

## 4 Experimental evaluation

We evaluate the performance of our algorithms empirically against prior work and natural baselines closely following the experimental setup of prior work [EMNTT20; EFNTT23], on a suite of benchmarks that are standard in the field: graph coverage, clustering, and recommender systems, under different fairness and matroid constraint settings. Our metrics are the submodular objective value  $f(S)$  and total fairness violation  $\text{fav}(S)$ . All of the considered algorithms return sets that are independent and upper-fair, so the measured fairness violations are all with respect to the lower bounds. We compare the following algorithms:

- **OUR( $\varepsilon$ )** – our algorithm of Theorem 3.4, for a range of settings of  $\varepsilon \in \{0.2, 0.5, 0.8\}$ . To compute a high-value solution  $Y$ , we run the natural greedy algorithm, which obtains a  $1/3$ -approximation (Theorem 2.5), as the local search algorithm of Theorem 2.6 is impractical. The large fair set  $P$  is obtained via augmenting paths, ignoring  $f$ .
- **TWOPASS** – the algorithm of [EFNTT23] (Theorem 1.1). Since it was originally developed for the streaming setting, to get a fair comparison we simplify away the parts (namely the first pass) whose purpose was ensuring low memory usage. The first step of the algorithm obtains a fair set via augmenting paths (ignoring  $f$ ). This is then divided in two, and each half is extended to an independent and upper-fair solution using a matroid intersection subroutine. For this we employ the greedy algorithm (the original implementation of [EFNTT23] used a swapping algorithm to ensure low memory and linear runtime, but it obtains inferior values).
- **LBMI** (Lower Bound Matroid Intersection) – an algorithm that always returns a fair set, with no theoretical guarantee on the value. It starts by building a fair set via augmenting paths, ignoring  $f$ , and then extends to a maximal solution using the greedy algorithm.
- **UBMI** (Upper Bound Matroid Intersection) – an algorithm that ignores lower bound constraints and just solves the matroid intersection problem for  $\mathcal{I}$  and  $\mathcal{U}$  (similar in spirit to MATROID-INTERSECTION from [EFNTT23]). Also here we use the greedy algorithm.
- **RANDOM** – an algorithm that randomly shuffles the universe and then adds each element if this keeps the solution independent and upper-fair.

For a fair comparison of the main underlying ideas, we made sure that the compared algorithms, particularly OUR and TWOPASS, use the same subroutines for similar tasks; for example, the implementations could likely benefit from heuristically taking  $f$  into account rather than ignoring  $f$  when building large fair sets, or from some local-search based postprocessing of the final solution. We do not compare to the algorithm of [ETNV24] (Theorem 1.2) as solving the multilinear extension makes it impractical. We repeat the randomized algorithms 40 times. All experiments can be run on commodity hardware (CPU only, single-threaded; we do not report runtimes) and take several hours to finish. Our code is in the supplementary material.

We outline the experimental scenarios below. In each experiment we vary a solution size scaling factor  $r$ , which roughly corresponds to the rank of the matroid  $\mathcal{I}$ .

**Graph coverage.** We use the Pokec social network [LK14]. Given a digraph  $G = (V, E)$  of users and their friendships, we select a subset  $S \subseteq V$  to maximize coverage, defined by

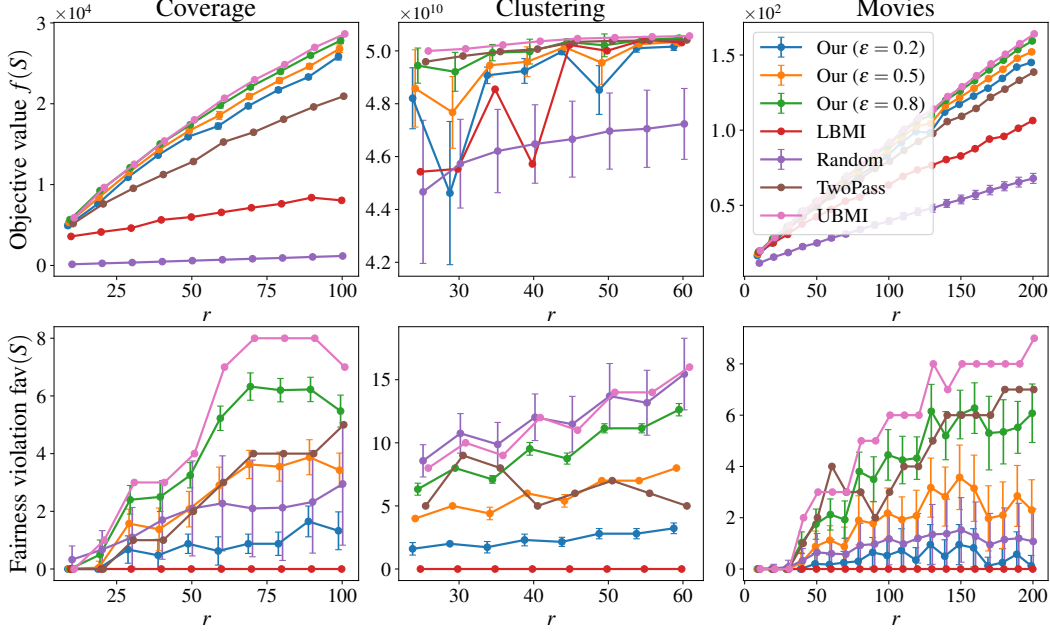

Figure 1: Our experimental results. Each column corresponds to one experiment; the top plot shows the objective value of each algorithm for a range of solution scale factors  $r$ , and the bottom plot shows fairness violations. For randomized algorithms we report averages, with error bars that correspond to sample standard deviation.

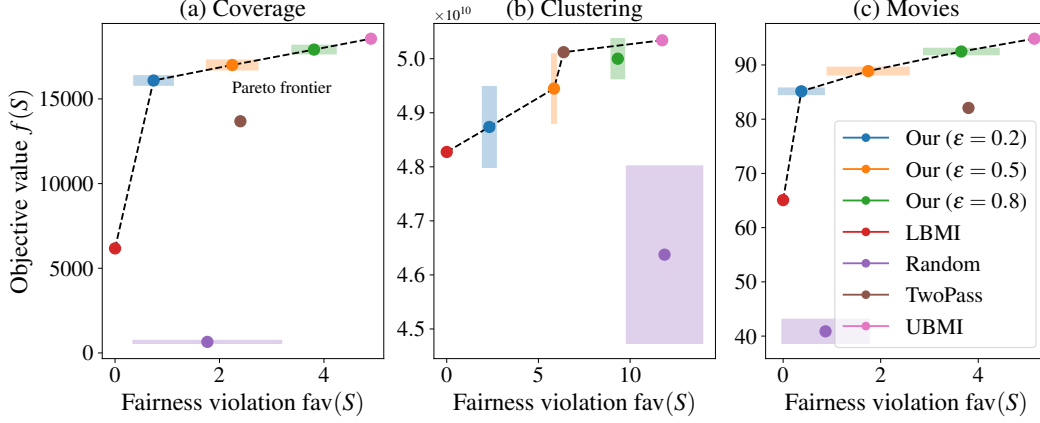

Figure 2: For each experiment and algorithm we take the average objective value and fairness violation over all  $r$ -values, and plot this as a single point. For randomized algorithms, the colored rectangles correspond to standard deviations. The dashed line corresponds to the Pareto frontier of the trade-off between objective value and fairness violation.

310  $f(S) = |\bigcup_{v \in S} N(v)|$ , where  $N(v)$  is the neighborhood of  $v$ . User profiles include age, gender,  
311 height, and weight. We impose a partition matroid on body mass index (BMI). Profiles miss-  
312 ing height or weight or with implausible data are removed, yielding a graph with 582,289 nodes  
313 and 5,834,695 edges. Users are partitioned into four BMI categories (underweight, normal, over-  
314 weight, obese), with upper bounds  $\lceil \frac{|V_i|}{|V|} r \rceil$  for each group  $V_i$ . We also enforce fairness by age,  
315 with 7 groups:  $[1, 10]$ ,  $[11, 17]$ ,  $[18, 25]$ ,  $[26, 35]$ ,  $[36, 45]$ ,  $[46, +]$ , no age. We set  $\ell_c = \lfloor 0.9 \frac{|V_c|}{|V|} r \rfloor$  and  
316  $u_c = \lceil 1.5 \frac{|V_c|}{|V|} r \rceil$ . We use  $r$  from 10 to 200.

317 **Exemplar-based clustering.** We use a dataset of 4521 phone calls from a Portuguese bank mar-  
318 keting campaign [MCR14]. The goal is to select a representative subset  $S \subseteq V$  for service quality  
319 assessment. Each record  $e \in V$  is represented as  $x_e \in \mathbb{R}^7$  using 7 numeric features, includ-  
320 ing age and account balance. We impose a partition matroid on account balance, with 5 groups:



321  $(-\infty, 0), [0, 2000), [2000, 4000), [4000, 6000), [6000, \infty)$ . Each group  $V_i$  has upper bound  $r/5$ . Fair-  
 322 ness is enforced by age, with 6 groups:  $[0, 29], [30, 39], [40, 49], [50, 59], [60, 69], [70+]$ , and bounds  
 323  $\ell_c = 0.1r + 2, u_c = 0.4r$  for each  $c$ . We maximize the monotone submodular function [GK10]:  
 324  $f(S) = \sum_{e' \in V} (d(e', 0) - \min_{e \in S \cup \{0\}} d(e', e))$  where  $d(e', e) = \|x_{e'} - x_e\|_2^2$  and  $x_0$  is the origin.  
 325 We use  $r$  from 30 to 60.

326 **Recommender system.** We simulate a movie recommendation system using the MovieLens 1M  
 327 dataset [HK16], with about one million ratings for 3900 movies by 6040 users. As in prior work [MB-  
 328 NTC17; NTMZMS18; EMNTT20; EFNTT23], we compute a low-rank completion of the user-movie  
 329 matrix [TCSBHTBA01], yielding  $w_u \in \mathbb{R}^{20}$  for each user  $u$  and  $v_m \in \mathbb{R}^{20}$  for each movie  $m$ . The  
 330 product  $w_u^\top v_m$  estimates user  $u$ 's rating for movie  $m$ . For user  $u$ , the monotone submodular utility  
 331 for a set  $S$  of movies is  $f(S) = \alpha \cdot \sum_{m' \in M} \max(\max_{m \in S} (v_m^\top v_{m'}), 0) + (1 - \alpha) \cdot \sum_{m \in S} w_u^\top v_m$ ,  
 332 with parameter  $\alpha = 0.85$  balancing coverage and personalized user score. We enforce proportional  
 333 representation of movies by release date using a partition matroid with 9 decade groups (1911–2000),  
 334 with upper bounds  $\lceil 1.2 \frac{|V_d|}{|V|} r \rceil$  for each decade  $V_d$ . Movies are also partitioned into 18 genres  $c$   
 335 (colors), with fairness bounds  $\ell_c = \lfloor 0.8 \frac{|V_c|}{|V|} r \rfloor$  and  $u_c = \lceil 1.4 \frac{|V_c|}{|V|} r \rceil$ . We use  $r$  from 10 to 200.

## 336 4.1 Results and discussion

337 Our results are depicted in Figs. 1 and 2. Similarly as prior work, we observe that enforcing fairness  
 338 does come at some cost in the utility value, and that the utility values of the algorithms are much  
 339 better in practice than the theoretical bounds guarantee.

340 In all three experiments, our algorithms produce solutions whose value is relatively competitive  
 341 with UBMI, which completely ignores the lower bound constraints and accordingly has the highest  
 342 fairness violations. In two of the three scenarios (coverage and movies), all OUR algorithms produce  
 343 a higher  $f$ -value than all the other baselines (RANDOM, LBMI, and TWOPASS); in particular,  
 344 TWOPASS is dominated by both OUR(0.2) and OUR(0.5) with respect to both metrics. For clustering  
 345 the situation is somewhat unclear, but TWOPASS generally does better. In terms of violation of the  
 346 lower bound fairness constraints, our different settings of  $\varepsilon$ , as expected, provide a smooth tradeoff.  
 347 The baseline that guarantees no fairness violations, LBMI, does relatively poorly in terms of  $f$ -value.

348 This tunability of  $\varepsilon$  is a key strength of our approach, allowing users to select an operating point that  
 349 best matches their specific requirements for the balance between utility and fairness.

## 350 5 Conclusion, limitations, broader impact, and future work

351 In this work we gave an improved algorithm for FMMSM which, for any  $\varepsilon > 0$ , returns an approxi-  
 352 mate solution that satisfies an expected  $(1 - \varepsilon)$  fraction of each fairness lower bound while satisfying  
 353 the matroid constraint and the fairness upper bound constraints exactly; the returned solution is also  
 354 large in size and enjoys high-concentration guarantees. Recent studies have shown that automated  
 355 algorithms used in decision-making can introduce bias and discrimination. We make progress towards  
 356 mitigating such effects in problems that can be formulated as submodular maximization under a  
 357 matroid constraint, which are relevant to a range of applications such as forming representative  
 358 committees or curating content for news feeds. We show the strong performance of our algorithm  
 359 empirically on several real-world tasks. As in prior work, we observe a balance between fairness  
 360 and utility value; however, this “price of fairness” should not be interpreted as fairness leading to  
 361 inferior outcomes, but rather as a trade-off between two valuable metrics. The parametric nature of  
 362 our algorithm (the tunable  $\varepsilon$  parameter) provides a new tool to help in navigating this balance.

363 Our work leaves open the exciting question of the approximability of FMMSM (without violations of  
 364 fairness constraints) and MSPM. Is there a constant-factor approximation algorithm for MSPM? Or is  
 365 there a superconstant hardness of approximation for FMMSM? (As remarked in [ETNV24], the latter  
 366 result would give a negative answer to a fundamental question posed by Vondrák [Von13].) We also  
 367 do not consider non-monotone objective functions or the streaming setting in this work. Finally, it is  
 368 important to note that the fairness notion we employ, though standard and general, does not capture  
 369 some notions of fairness considered in the literature (see e.g. [CR18; TWRTZ19]). No universal  
 370 definition of fairness exists; the choice of which definition to apply is application-dependent and an  
 371 active area of research.

## References

- [Bid06] Dan Biddle. *Adverse impact and test validation: A practitioner's guide to valid and defensible employment testing*. Gower Publishing, Ltd., 2006.
- [BLS17] Markus Brill, Jean-François Laslier, and Piotr Skowron. “Multiwinner Approval Rules as Apportionment Methods”. In: *AAAI*. AAAI Press, 2017, pp. 414–420.
- [CCPV11] Gruia Calinescu, Chandra Chekuri, Martin Pál, and Jan Vondrák. “Maximizing a Monotone Submodular Function Subject to a Matroid Constraint”. In: *SIAM Journal on Computing* 40.6 (2011), pp. 1740–1766. DOI: 10.1137/080733991.
- [CCRL13] Joanne McGrath Cohoon, James P. Cohoon, Seth Reichelson, and Selwyn Lawrence. “Effective Recruiting for Diversity”. In: *FIE*. IEEE Computer Society, 2013, pp. 1123–1124.
- [CHV18] L. Elisa Celis, Lingxiao Huang, and Nisheeth K. Vishnoi. “Multiwinner Voting with Fairness Constraints”. In: *IJCAI*. ijcai.org, 2018, pp. 144–151.
- [CKLV17] Flavio Chierichetti, Ravi Kumar, Silvio Lattanzi, and Sergei Vassilvitskii. “Fair Clustering Through Fairlets”. In: *NIPS*. 2017, pp. 5029–5037.
- [CKLV19] Flavio Chierichetti, Ravi Kumar, Silvio Lattanzi, and Sergei Vassilvitskii. “Matroids, Matchings, and Fairness”. In: *AISTATS*. Vol. 89. Proceedings of Machine Learning Research. PMLR, 2019, pp. 2212–2220.
- [CKSDKV18] L. Elisa Celis, Vijay Keswani, Damian Straszak, Amit Deshpande, Tarun Kathuria, and Nisheeth K. Vishnoi. “Fair and Diverse DPP-Based Data Summarization”. In: *ICML*. Vol. 80. Proceedings of Machine Learning Research. PMLR, 2018, pp. 715–724.
- [CR18] Alexandra Chouldechova and Aaron Roth. “The frontiers of fairness in machine learning”. In: *arXiv preprint arXiv:1810.08810* (2018).
- [CSV18] L. Elisa Celis, Damian Straszak, and Nisheeth K. Vishnoi. “Ranking with Fairness Constraints”. In: *ICALP*. Vol. 107. LIPIcs. Schloss Dagstuhl - Leibniz-Zentrum für Informatik, 2018, 28:1–28:15.
- [DHPRZ12] Cynthia Dwork, Moritz Hardt, Toniann Pitassi, Omer Reingold, and Richard Zemel. “Fairness through awareness”. In: *Proceedings of the 3rd innovations in theoretical computer science conference*. 2012, pp. 214–226.
- [DK11] Abhimanyu Das and David Kempe. “Submodular meets Spectral: Greedy Algorithms for Subset Selection, Sparse Approximation and Dictionary Selection”. In: *ICML*. Omnipress, 2011, pp. 1057–1064.
- [EFNTT23] Marwa El Halabi, Federico Fusco, Ashkan Norouzi-Fard, Jakab Tardos, and Jakub Tarnawski. “Fairness in Streaming Submodular Maximization over a Matroid Constraint”. In: *International Conference on Machine Learning*. PMLR. 2023, pp. 9150–9171.
- [EG11] Khalid El-Arini and Carlos Guestrin. “Beyond keyword search: discovering relevant scientific literature”. In: *KDD*. ACM, 2011, pp. 439–447.
- [EMNTT20] Marwa El Halabi, Slobodan Mitrovic, Ashkan Norouzi-Fard, Jakab Tardos, and Jakub Tarnawski. “Fairness in Streaming Submodular Maximization: Algorithms and Hardness”. In: *NeurIPS*. 2020.
- [ETNV24] Marwa El Halabi, Jakub Tarnawski, Ashkan Norouzi-Fard, and Thuy-Duong Vuong. “Fairness in Submodular Maximization over a Matroid Constraint”. In: *International Conference on Artificial Intelligence and Statistics, 2-4 May 2024, Palau de Congressos, Valencia, Spain*. Ed. by Sanjoy Dasgupta, Stephan Mandt, and Yingzhen Li. Vol. 238. Proceedings of Machine Learning Research. PMLR, 2024, pp. 1027–1035. URL: <https://proceedings.mlr.press/v238/el-halabi24a.html>.
- [Eur22] European Union FRA. *Bias in Algorithms — Artificial Intelligence and Discrimination*. Luxembourg: European Union Agency for Fundamental Rights. Publications Office of the European Union, 2022.
- [Fei98] Uriel Feige. “A Threshold of  $\ln n$  for Approximating Set Cover”. In: *J. ACM* 45.4 (1998), pp. 634–652.

426 [FLNSZ22] Moran Feldman, Paul Liu, Ashkan Norouzi-Fard, Ola Svensson, and Rico Zen-  
427 klusen. “Streaming Submodular Maximization Under Matroid Constraints”. In:  
428 *ICALP*. Vol. 229. LIPIcs. Schloss Dagstuhl - Leibniz-Zentrum für Informatik,  
429 2022, 59:1–59:20.

430 [GHIM09] Michel X. Goemans, Nicholas J. A. Harvey, Satoru Iwata, and Vahab S. Mir-  
431 rokni. “Approximating submodular functions everywhere”. In: *Proceedings of*  
432 *the Twentieth Annual ACM-SIAM Symposium on Discrete Algorithms, SODA*  
433 *2009, New York, NY, USA, January 4-6, 2009*. Ed. by Claire Mathieu. SIAM,  
434 2009, pp. 535–544. DOI: 10 . 1137 / 1 . 9781611973068 . 59. URL: [https :  
435 //doi.org/10.1137/1.9781611973068.59](https://doi.org/10.1137/1.9781611973068.59).

436 [GJS21] Paritosh Garg, Linus Jordan, and Ola Svensson. “Semi-streaming Algorithms  
437 for Submodular Matroid Intersection”. In: *IPCO*. Vol. 12707. Lecture Notes in  
438 Computer Science. Springer, 2021, pp. 208–222.

439 [GK10] Ryan Gomes and Andreas Krause. “Budgeted Nonparametric Learning from Data  
440 Streams”. In: *ICML*. Omnipress, 2010, pp. 391–398.

441 [GK11] Daniel Golovin and Andreas Krause. “Adaptive Submodularity: Theory and  
442 Applications in Active Learning and Stochastic Optimization”. In: *J. Artif. Intell.*  
443 *Res.* 42 (2011), pp. 427–486.

444 [HK16] F Maxwell Harper and Joseph A Konstan. “The MovieLens datasets: History  
445 and context”. In: *ACM Transactions on Interactive Intelligent Systems (TiiS)* 5.4  
446 (2016), p. 19.

447 [LB11] Hui Lin and Jeff A. Bilmes. “A Class of Submodular Functions for Document  
448 Summarization”. In: *ACL*. The Association for Computer Linguistics, 2011,  
449 pp. 510–520.

450 [LK14] Jure Leskovec and Andrej Krevl. *SNAP Datasets: Stanford Large Network*  
451 *Dataset Collection*. <http://snap.stanford.edu/data>. June 2014.

452 [LSV10] Jon Lee, Maxim Sviridenko, and Jan Vondrák. “Submodular maximization over  
453 multiple matroids via generalized exchange properties”. In: *Mathematics of*  
454 *Operations Research* 35.4 (2010), pp. 795–806.

455 [MBNTC17] Slobodan Mitrović, Ilija Bogunović, Ashkan Norouzi-Fard, Jakub Tarnawski, and  
456 Volkan Cevher. “Streaming Robust Submodular Maximization: A Partitioned  
457 Thresholding Approach”. In: *Advances in Neural Information Processing Systems*.  
458 2017.

459 [MCR14] Sérgio Moro, Paulo Cortez, and Paulo Rita. “A data-driven approach to predict  
460 the success of bank telemarketing”. In: *Decis. Support Syst.* 62 (2014), pp. 22–31.

461 [MMD16] Cecilia Munoz, Smith Megan, and DJ Patil. *Big data: A report on algorithmic*  
462 *systems, opportunity, and civil rights*. Washington, DC: Executive Office of the  
463 President. The White House, 2016.

464 [Mon95] Burt L Monroe. “Fully proportional representation”. In: *American Political Sci-*  
465 *ence Review* 89.4 (1995), pp. 925–940.

466 [NTMZMS18] Ashkan Norouzi-Fard, Jakub Tarnawski, Slobodan Mitrović, Amir Zandieh, Aida  
467 Mousavifar, and Ola Svensson. “Beyond 1/2-approximation for submodular  
468 maximization on massive data streams”. In: *ICML* (2018).

469 [Sch03] Alexander Schrijver. *Combinatorial Optimization: Polyhedra and Efficiency*.  
470 Vol. B. Jan. 2003.

471 [TCSBHTBA01] Olga Troyanskaya, Michael Cantor, Gavin Sherlock, Pat Brown, Trevor Hastie,  
472 Robert Tibshirani, David Botstein, and Russ B Altman. “Missing value estimation  
473 methods for DNA microarrays”. In: *Bioinformatics* 17.6 (2001), pp. 520–525.

474 [TWRTZ19] Alan Tsang, Bryan Wilder, Eric Rice, Milind Tambe, and Yair Zick. “Group-  
475 Fairness in Influence Maximization”. In: *Proceedings of the Twenty-Eighth Inter-*  
476 *national Joint Conference on Artificial Intelligence, IJCAI-19*. International Joint  
477 Conferences on Artificial Intelligence Organization, July 2019, pp. 5997–6005.  
478 DOI: 10 . 24963 / ijcai . 2019 / 831. URL: [https : // doi . org / 10 . 24963 /  
479 ijcai.2019/831](https://doi.org/10.24963/ijcai.2019/831).

- 480 [Von13] Jan Vondrák. *Submodular Functions and Their Applications*. Plenary talk at  
481 the ACM-SIAM Symposium on Discrete Algorithms (SODA) 2013. 2013. URL:  
482 [https://theory.stanford.edu/~jvondrak/data/SODA-plenary-](https://theory.stanford.edu/~jvondrak/data/SODA-plenary-talk.pdf)  
483 [talk.pdf](https://theory.stanford.edu/~jvondrak/data/SODA-plenary-talk.pdf).
- 484 [Whi22] White House OSTP. *Blueprint for an AI Bill of Rights*. Washington, DC: White  
485 House Office of Science and Technology Policy, 2022.
- 486 [ZVGG17] Muhammad Bilal Zafar, Isabel Valera, Manuel Gomez-Rodriguez, and Krishna  
487 P. Gummadi. “Fairness Constraints: Mechanisms for Fair Classification”. In:  
488 *AISTATS*. Vol. 54. Proceedings of Machine Learning Research. PMLR, 2017,  
489 pp. 962–970.

490 **A Supplementary Material**

491 We provide a full version of the paper with all omitted content, skipped proofs etc. together with the  
492 supplementary material.

## NeurIPS Paper Checklist

### 1. Claims

Question: Do the main claims made in the abstract and introduction accurately reflect the paper's contributions and scope?

Answer: [\[Yes\]](#)

Guidelines:

- The answer NA means that the abstract and introduction do not include the claims made in the paper.
- The abstract and/or introduction should clearly state the claims made, including the contributions made in the paper and important assumptions and limitations. A No or NA answer to this question will not be perceived well by the reviewers.
- The claims made should match theoretical and experimental results, and reflect how much the results can be expected to generalize to other settings.
- It is fine to include aspirational goals as motivation as long as it is clear that these goals are not attained by the paper.

### 2. Limitations

Question: Does the paper discuss the limitations of the work performed by the authors?

Answer: [\[Yes\]](#)

Justification: Yes, particularly in Section 5.

Guidelines:

- The answer NA means that the paper has no limitation while the answer No means that the paper has limitations, but those are not discussed in the paper.
- The authors are encouraged to create a separate "Limitations" section in their paper.
- The paper should point out any strong assumptions and how robust the results are to violations of these assumptions (e.g., independence assumptions, noiseless settings, model well-specification, asymptotic approximations only holding locally). The authors should reflect on how these assumptions might be violated in practice and what the implications would be.
- The authors should reflect on the scope of the claims made, e.g., if the approach was only tested on a few datasets or with a few runs. In general, empirical results often depend on implicit assumptions, which should be articulated.
- The authors should reflect on the factors that influence the performance of the approach. For example, a facial recognition algorithm may perform poorly when image resolution is low or images are taken in low lighting. Or a speech-to-text system might not be used reliably to provide closed captions for online lectures because it fails to handle technical jargon.
- The authors should discuss the computational efficiency of the proposed algorithms and how they scale with dataset size.
- If applicable, the authors should discuss possible limitations of their approach to address problems of privacy and fairness.
- While the authors might fear that complete honesty about limitations might be used by reviewers as grounds for rejection, a worse outcome might be that reviewers discover limitations that aren't acknowledged in the paper. The authors should use their best judgment and recognize that individual actions in favor of transparency play an important role in developing norms that preserve the integrity of the community. Reviewers will be specifically instructed to not penalize honesty concerning limitations.

### 3. Theory assumptions and proofs

Question: For each theoretical result, does the paper provide the full set of assumptions and a complete (and correct) proof?

Answer: [\[Yes\]](#)

Guidelines:

- The answer NA means that the paper does not include theoretical results.
- All the theorems, formulas, and proofs in the paper should be numbered and cross-referenced.
- All assumptions should be clearly stated or referenced in the statement of any theorems.
- The proofs can either appear in the main paper or the supplemental material, but if they appear in the supplemental material, the authors are encouraged to provide a short proof sketch to provide intuition.
- Inversely, any informal proof provided in the core of the paper should be complemented by formal proofs provided in appendix or supplemental material.
- Theorems and Lemmas that the proof relies upon should be properly referenced.

#### 4. Experimental result reproducibility

Question: Does the paper fully disclose all the information needed to reproduce the main experimental results of the paper to the extent that it affects the main claims and/or conclusions of the paper (regardless of whether the code and data are provided or not)?

Answer: [\[Yes\]](#)

Justification: Yes, we provide the full source code in the supplementary material, zipped together with all relevant datasets for ease of execution. We will also open-source release the code together with the camera-ready version.

Guidelines:

- The answer NA means that the paper does not include experiments.
- If the paper includes experiments, a No answer to this question will not be perceived well by the reviewers: Making the paper reproducible is important, regardless of whether the code and data are provided or not.
- If the contribution is a dataset and/or model, the authors should describe the steps taken to make their results reproducible or verifiable.
- Depending on the contribution, reproducibility can be accomplished in various ways. For example, if the contribution is a novel architecture, describing the architecture fully might suffice, or if the contribution is a specific model and empirical evaluation, it may be necessary to either make it possible for others to replicate the model with the same dataset, or provide access to the model. In general, releasing code and data is often one good way to accomplish this, but reproducibility can also be provided via detailed instructions for how to replicate the results, access to a hosted model (e.g., in the case of a large language model), releasing of a model checkpoint, or other means that are appropriate to the research performed.
- While NeurIPS does not require releasing code, the conference does require all submissions to provide some reasonable avenue for reproducibility, which may depend on the nature of the contribution. For example
  - (a) If the contribution is primarily a new algorithm, the paper should make it clear how to reproduce that algorithm.
  - (b) If the contribution is primarily a new model architecture, the paper should describe the architecture clearly and fully.
  - (c) If the contribution is a new model (e.g., a large language model), then there should either be a way to access this model for reproducing the results or a way to reproduce the model (e.g., with an open-source dataset or instructions for how to construct the dataset).
  - (d) We recognize that reproducibility may be tricky in some cases, in which case authors are welcome to describe the particular way they provide for reproducibility. In the case of closed-source models, it may be that access to the model is limited in some way (e.g., to registered users), but it should be possible for other researchers to have some path to reproducing or verifying the results.

#### 5. Open access to data and code

Question: Does the paper provide open access to the data and code, with sufficient instructions to faithfully reproduce the main experimental results, as described in supplemental material?

Answer: [Yes]

Justification: Yes, we provide the full source code in the supplementary material, zipped together with all relevant datasets for ease of execution. We will also open-source release the code together with the camera-ready version.

Guidelines:

- The answer NA means that paper does not include experiments requiring code.
- Please see the NeurIPS code and data submission guidelines (<https://nips.cc/public/guides/CodeSubmissionPolicy>) for more details.
- While we encourage the release of code and data, we understand that this might not be possible, so “No” is an acceptable answer. Papers cannot be rejected simply for not including code, unless this is central to the contribution (e.g., for a new open-source benchmark).
- The instructions should contain the exact command and environment needed to run to reproduce the results. See the NeurIPS code and data submission guidelines (<https://nips.cc/public/guides/CodeSubmissionPolicy>) for more details.
- The authors should provide instructions on data access and preparation, including how to access the raw data, preprocessed data, intermediate data, and generated data, etc.
- The authors should provide scripts to reproduce all experimental results for the new proposed method and baselines. If only a subset of experiments are reproducible, they should state which ones are omitted from the script and why.
- At submission time, to preserve anonymity, the authors should release anonymized versions (if applicable).
- Providing as much information as possible in supplemental material (appended to the paper) is recommended, but including URLs to data and code is permitted.

## 6. Experimental setting/details

Question: Does the paper specify all the training and test details (e.g., data splits, hyper-parameters, how they were chosen, type of optimizer, etc.) necessary to understand the results?

Answer: [Yes]

Guidelines:

- The answer NA means that the paper does not include experiments.
- The experimental setting should be presented in the core of the paper to a level of detail that is necessary to appreciate the results and make sense of them.
- The full details can be provided either with the code, in appendix, or as supplemental material.

## 7. Experiment statistical significance

Question: Does the paper report error bars suitably and correctly defined or other appropriate information about the statistical significance of the experiments?

Answer: [Yes]

Justification: Yes, we report sample standard deviation error bars in the plots (and in the result files in the supplementary material). These correspond to the randomness used by the algorithm.

Guidelines:

- The answer NA means that the paper does not include experiments.
- The authors should answer "Yes" if the results are accompanied by error bars, confidence intervals, or statistical significance tests, at least for the experiments that support the main claims of the paper.
- The factors of variability that the error bars are capturing should be clearly stated (for example, train/test split, initialization, random drawing of some parameter, or overall run with given experimental conditions).
- The method for calculating the error bars should be explained (closed form formula, call to a library function, bootstrap, etc.)



- The assumptions made should be given (e.g., Normally distributed errors).
- It should be clear whether the error bar is the standard deviation or the standard error of the mean.
- It is OK to report 1-sigma error bars, but one should state it. The authors should preferably report a 2-sigma error bar than state that they have a 96% CI, if the hypothesis of Normality of errors is not verified.
- For asymmetric distributions, the authors should be careful not to show in tables or figures symmetric error bars that would yield results that are out of range (e.g. negative error rates).
- If error bars are reported in tables or plots, The authors should explain in the text how they were calculated and reference the corresponding figures or tables in the text.

## 8. Experiments compute resources

Question: For each experiment, does the paper provide sufficient information on the computer resources (type of compute workers, memory, time of execution) needed to reproduce the experiments?

Answer: [Yes]

Justification: The experiments can be run on commodity hardware (CPU only, single-threaded) and take several hours to finish. We mention this in Section 4.

Guidelines:

- The answer NA means that the paper does not include experiments.
- The paper should indicate the type of compute workers CPU or GPU, internal cluster, or cloud provider, including relevant memory and storage.
- The paper should provide the amount of compute required for each of the individual experimental runs as well as estimate the total compute.
- The paper should disclose whether the full research project required more compute than the experiments reported in the paper (e.g., preliminary or failed experiments that didn't make it into the paper).

## 9. Code of ethics

Question: Does the research conducted in the paper conform, in every respect, with the NeurIPS Code of Ethics <https://neurips.cc/public/EthicsGuidelines>?

Answer: [Yes]

Guidelines:

- The answer NA means that the authors have not reviewed the NeurIPS Code of Ethics.
- If the authors answer No, they should explain the special circumstances that require a deviation from the Code of Ethics.
- The authors should make sure to preserve anonymity (e.g., if there is a special consideration due to laws or regulations in their jurisdiction).

## 10. Broader impacts

Question: Does the paper discuss both potential positive societal impacts and negative societal impacts of the work performed?

Answer: [Yes]

Justification: Yes, in Section 5.

Guidelines:

- The answer NA means that there is no societal impact of the work performed.
- If the authors answer NA or No, they should explain why their work has no societal impact or why the paper does not address societal impact.
- Examples of negative societal impacts include potential malicious or unintended uses (e.g., disinformation, generating fake profiles, surveillance), fairness considerations (e.g., deployment of technologies that could make decisions that unfairly impact specific groups), privacy considerations, and security considerations.

- The conference expects that many papers will be foundational research and not tied to particular applications, let alone deployments. However, if there is a direct path to any negative applications, the authors should point it out. For example, it is legitimate to point out that an improvement in the quality of generative models could be used to generate deepfakes for disinformation. On the other hand, it is not needed to point out that a generic algorithm for optimizing neural networks could enable people to train models that generate Deepfakes faster.
- The authors should consider possible harms that could arise when the technology is being used as intended and functioning correctly, harms that could arise when the technology is being used as intended but gives incorrect results, and harms following from (intentional or unintentional) misuse of the technology.
- If there are negative societal impacts, the authors could also discuss possible mitigation strategies (e.g., gated release of models, providing defenses in addition to attacks, mechanisms for monitoring misuse, mechanisms to monitor how a system learns from feedback over time, improving the efficiency and accessibility of ML).

## 11. Safeguards

Question: Does the paper describe safeguards that have been put in place for responsible release of data or models that have a high risk for misuse (e.g., pretrained language models, image generators, or scraped datasets)?

Answer: [NA]

Guidelines:

- The answer NA means that the paper poses no such risks.
- Released models that have a high risk for misuse or dual-use should be released with necessary safeguards to allow for controlled use of the model, for example by requiring that users adhere to usage guidelines or restrictions to access the model or implementing safety filters.
- Datasets that have been scraped from the Internet could pose safety risks. The authors should describe how they avoided releasing unsafe images.
- We recognize that providing effective safeguards is challenging, and many papers do not require this, but we encourage authors to take this into account and make a best faith effort.

## 12. Licenses for existing assets

Question: Are the creators or original owners of assets (e.g., code, data, models), used in the paper, properly credited and are the license and terms of use explicitly mentioned and properly respected?

Answer: [Yes]

Guidelines:

- The answer NA means that the paper does not use existing assets.
- The authors should cite the original paper that produced the code package or dataset.
- The authors should state which version of the asset is used and, if possible, include a URL.
- The name of the license (e.g., CC-BY 4.0) should be included for each asset.
- For scraped data from a particular source (e.g., website), the copyright and terms of service of that source should be provided.
- If assets are released, the license, copyright information, and terms of use in the package should be provided. For popular datasets, [paperswithcode.com/datasets](https://paperswithcode.com/datasets) has curated licenses for some datasets. Their licensing guide can help determine the license of a dataset.
- For existing datasets that are re-packaged, both the original license and the license of the derived asset (if it has changed) should be provided.
- If this information is not available online, the authors are encouraged to reach out to the asset's creators.

## 13. New assets

753 Question: Are new assets introduced in the paper well documented and is the documentation  
754 provided alongside the assets?

755 Answer: [NA]

756 Justification: We release no new assets (except code, which is discussed elsewhere).

757 Guidelines:

- 758 • The answer NA means that the paper does not release new assets.
- 759 • Researchers should communicate the details of the dataset/code/model as part of their  
760 submissions via structured templates. This includes details about training, license,  
761 limitations, etc.
- 762 • The paper should discuss whether and how consent was obtained from people whose  
763 asset is used.
- 764 • At submission time, remember to anonymize your assets (if applicable). You can either  
765 create an anonymized URL or include an anonymized zip file.

766 **14. Crowdsourcing and research with human subjects**

767 Question: For crowdsourcing experiments and research with human subjects, does the paper  
768 include the full text of instructions given to participants and screenshots, if applicable, as  
769 well as details about compensation (if any)?

770 Answer: [NA]

771 Guidelines:

- 772 • The answer NA means that the paper does not involve crowdsourcing nor research with  
773 human subjects.
- 774 • Including this information in the supplemental material is fine, but if the main contribu-  
775 tion of the paper involves human subjects, then as much detail as possible should be  
776 included in the main paper.
- 777 • According to the NeurIPS Code of Ethics, workers involved in data collection, curation,  
778 or other labor should be paid at least the minimum wage in the country of the data  
779 collector.

780 **15. Institutional review board (IRB) approvals or equivalent for research with human  
781 subjects**

782 Question: Does the paper describe potential risks incurred by study participants, whether  
783 such risks were disclosed to the subjects, and whether Institutional Review Board (IRB)  
784 approvals (or an equivalent approval/review based on the requirements of your country or  
785 institution) were obtained?

786 Answer: [NA]

787 Guidelines:

- 788 • The answer NA means that the paper does not involve crowdsourcing nor research with  
789 human subjects.
- 790 • Depending on the country in which research is conducted, IRB approval (or equivalent)  
791 may be required for any human subjects research. If you obtained IRB approval, you  
792 should clearly state this in the paper.
- 793 • We recognize that the procedures for this may vary significantly between institutions  
794 and locations, and we expect authors to adhere to the NeurIPS Code of Ethics and the  
795 guidelines for their institution.
- 796 • For initial submissions, do not include any information that would break anonymity (if  
797 applicable), such as the institution conducting the review.

798 **16. Declaration of LLM usage**

799 Question: Does the paper describe the usage of LLMs if it is an important, original, or  
800 non-standard component of the core methods in this research? Note that if the LLM is used  
801 only for writing, editing, or formatting purposes and does not impact the core methodology,  
802 scientific rigorousness, or originality of the research, declaration is not required.

803 Answer: [NA]

804 Guidelines:

- 805 • The answer NA means that the core method development in this research does not  
806 involve LLMs as any important, original, or non-standard components.
- 807 • Please refer to our LLM policy (<https://neurips.cc/Conferences/2025/LLM>)  
808 for what should or should not be described.
