# Supplementary material
Source: ML conference proceedings conference paper supplement (https://openreview.net/forum?id=gfGLEtWAqV)

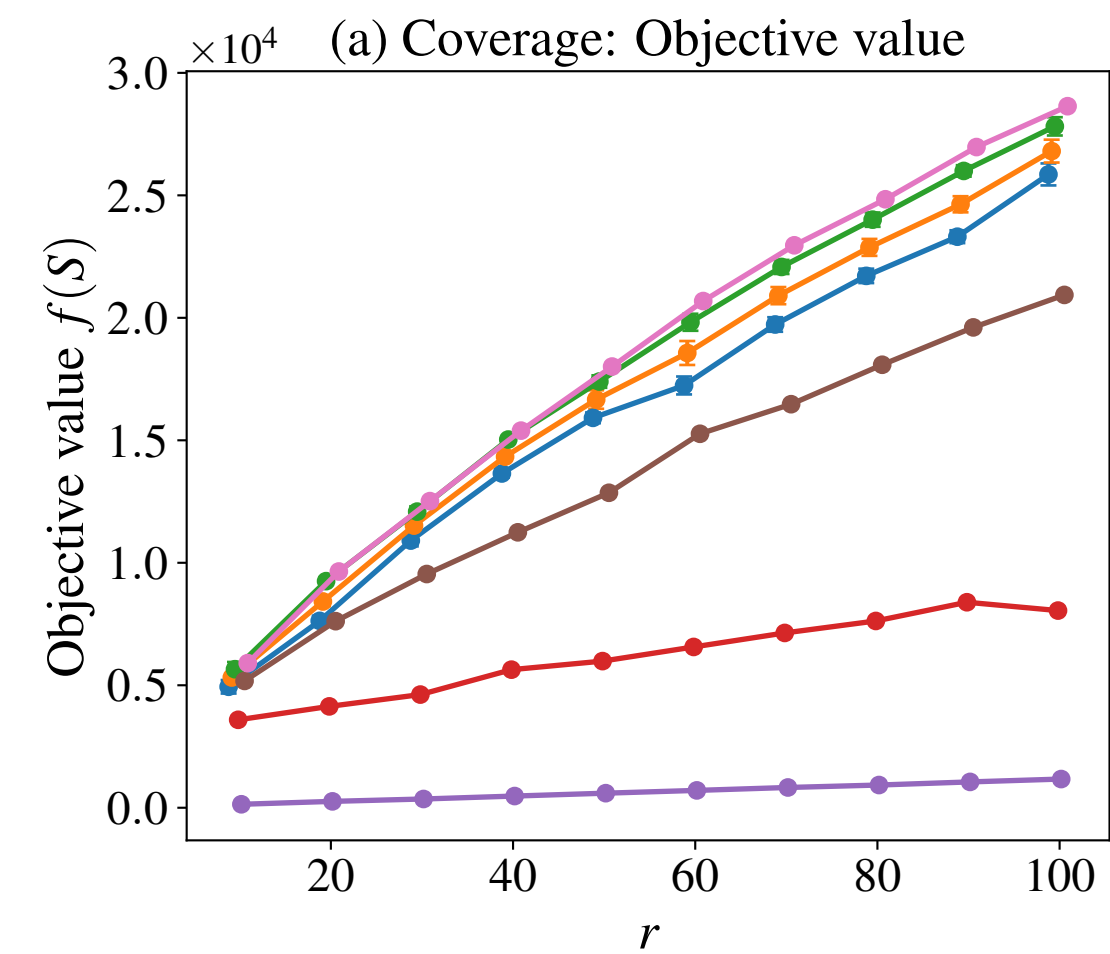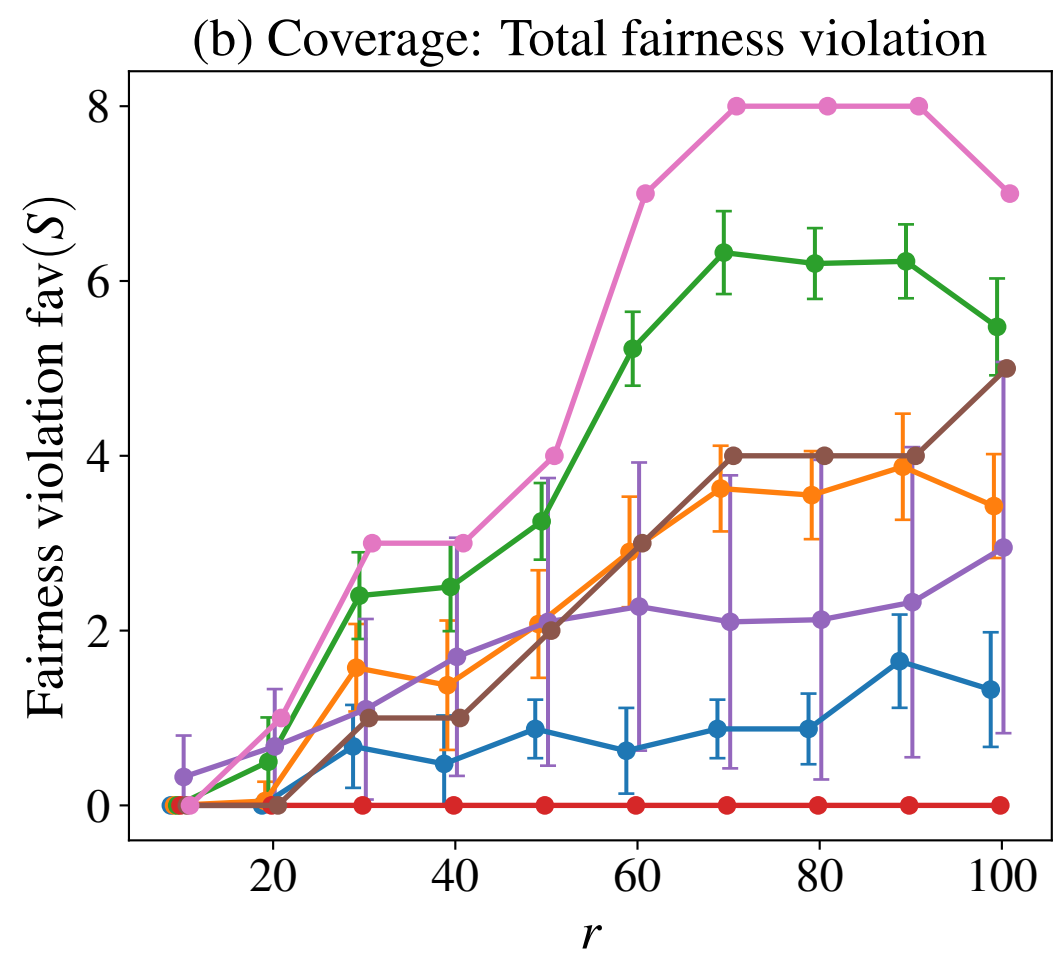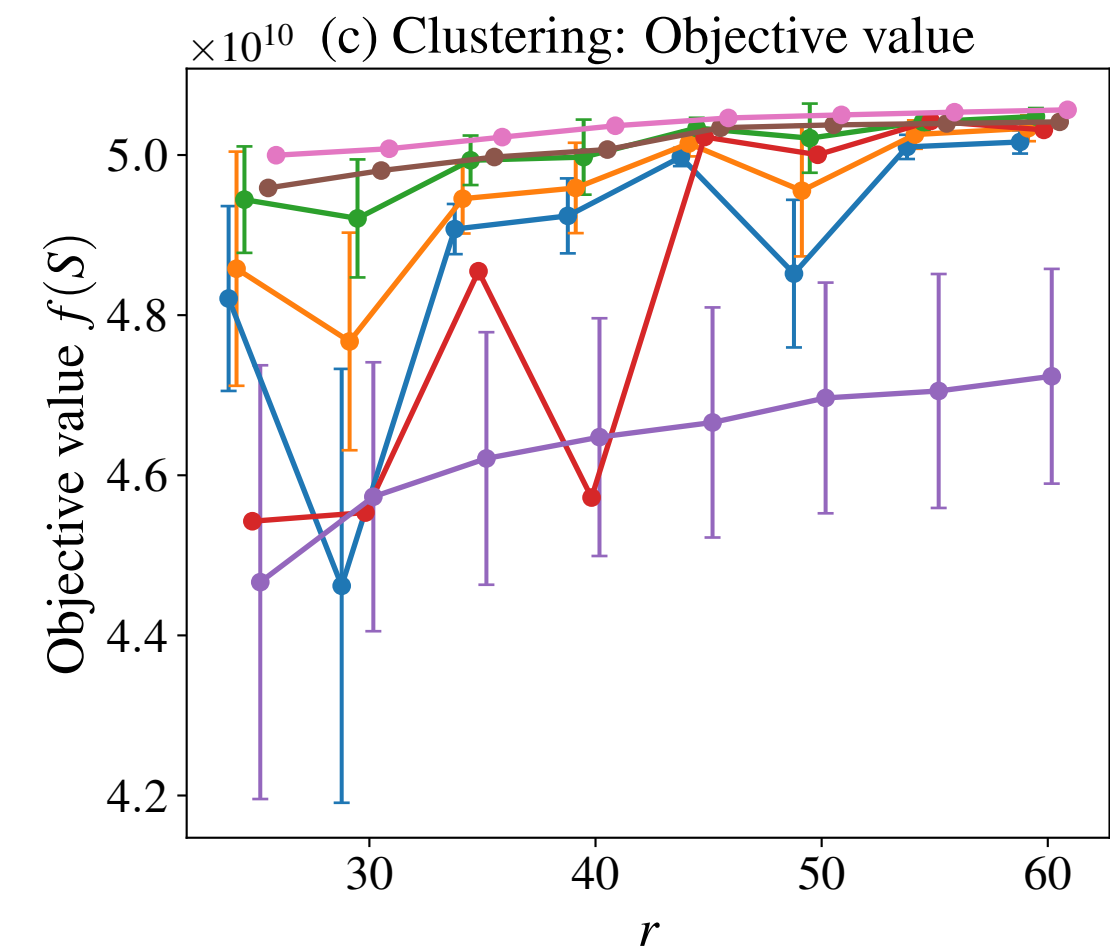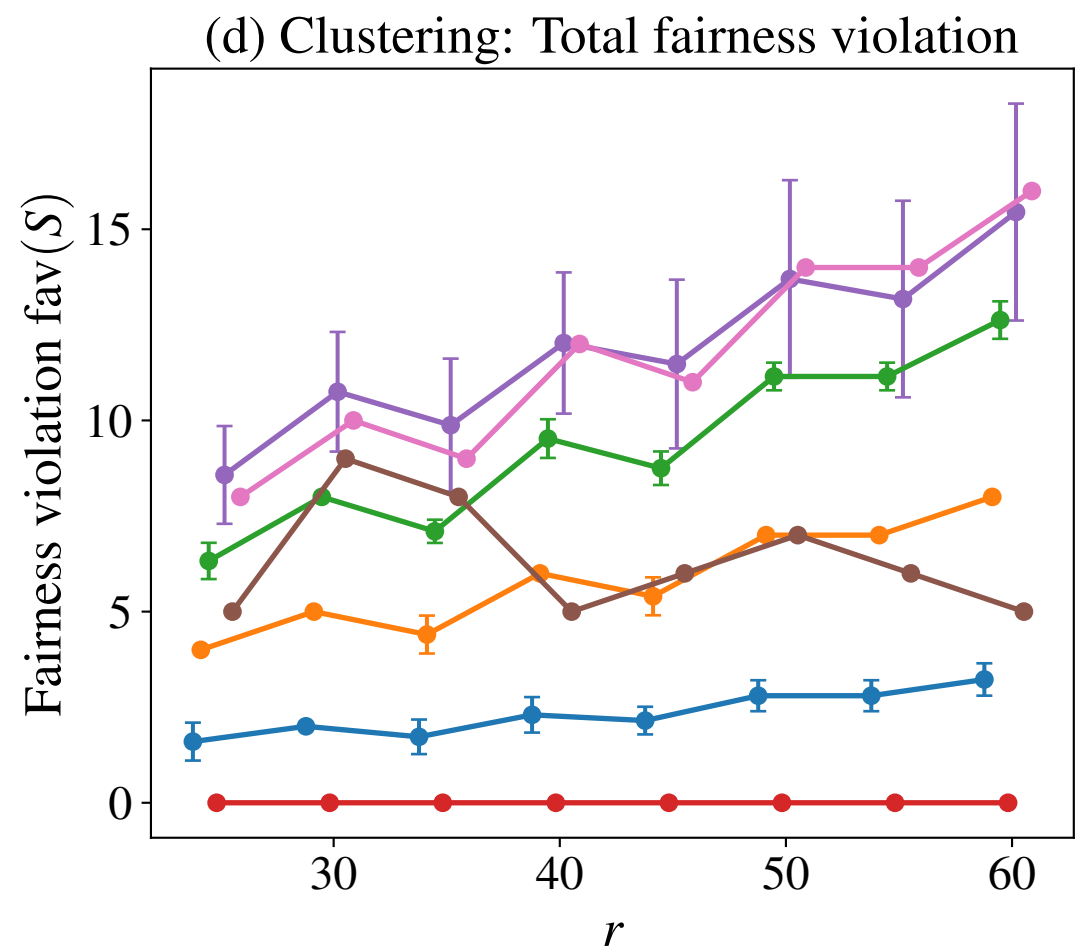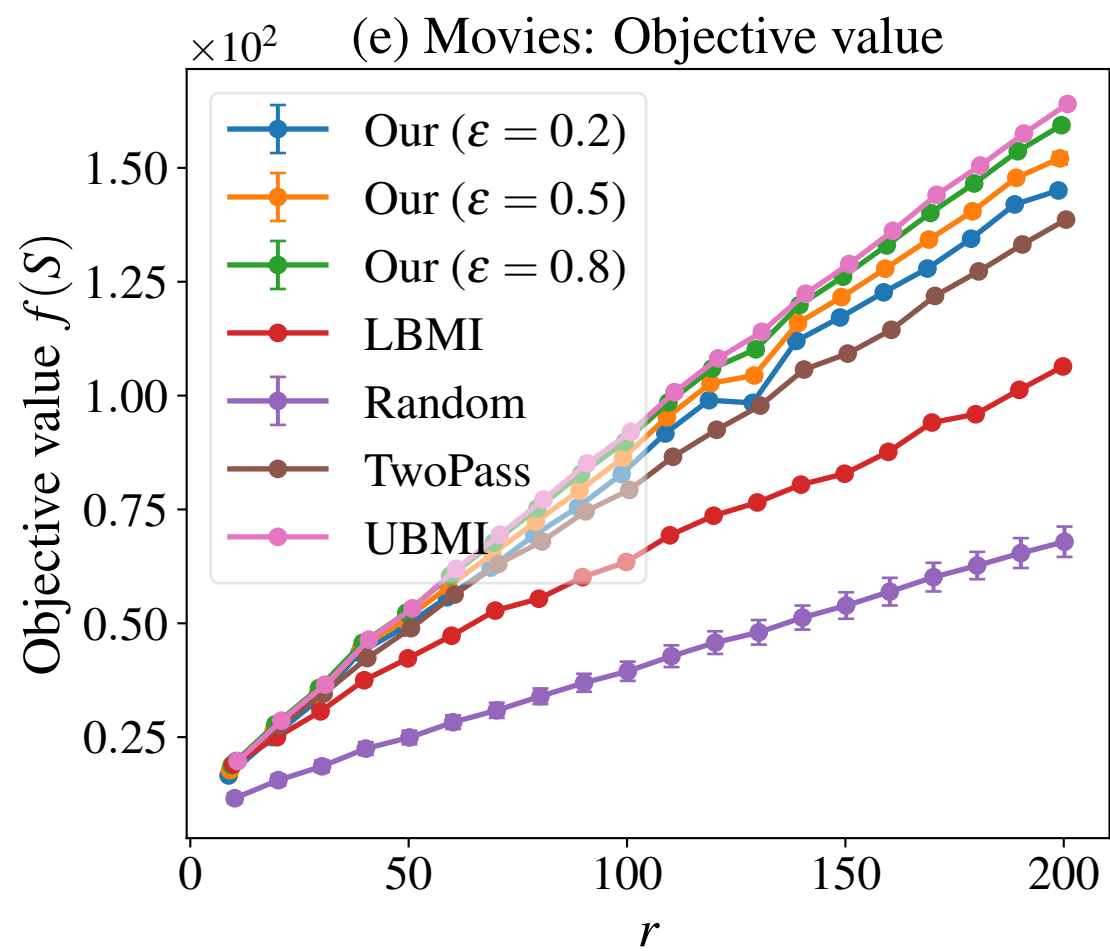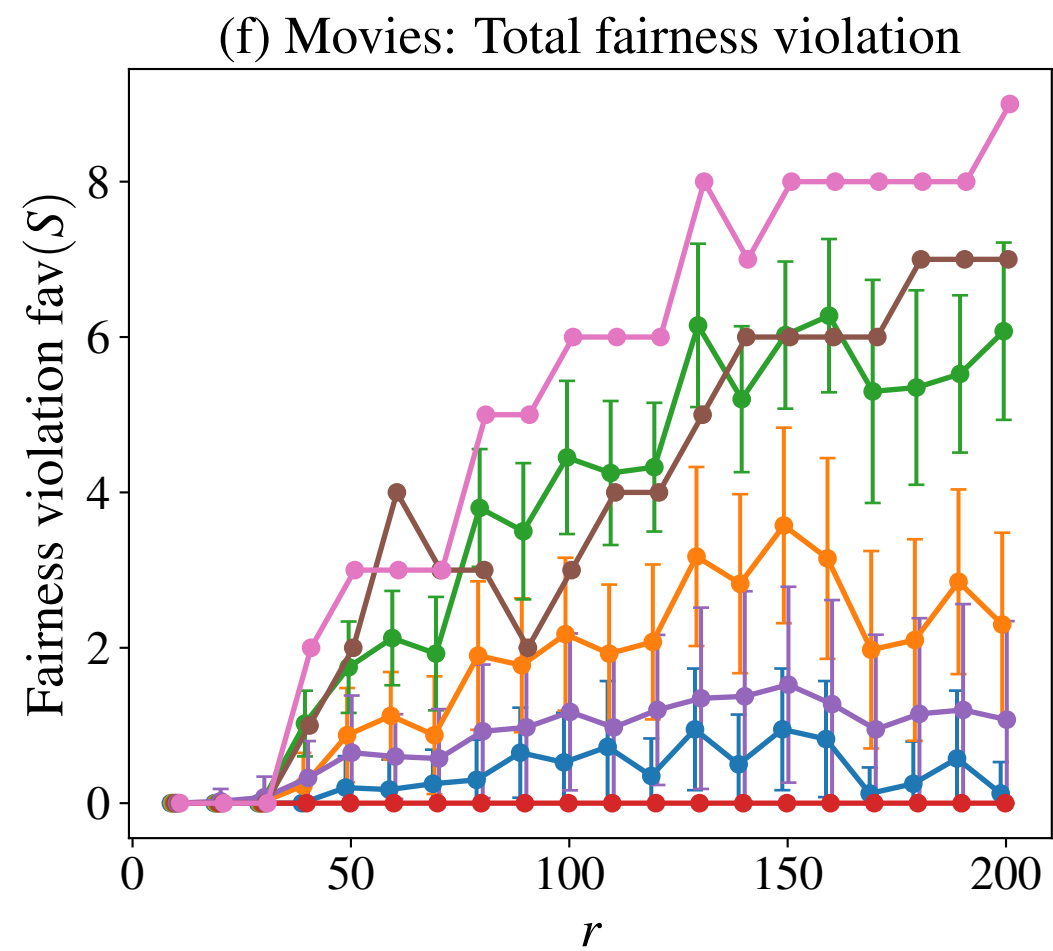

Supplement: supplementary_material [file large_plots_grid.pdf › neurips/large_plots_grid.pdf]

(a) Coverage

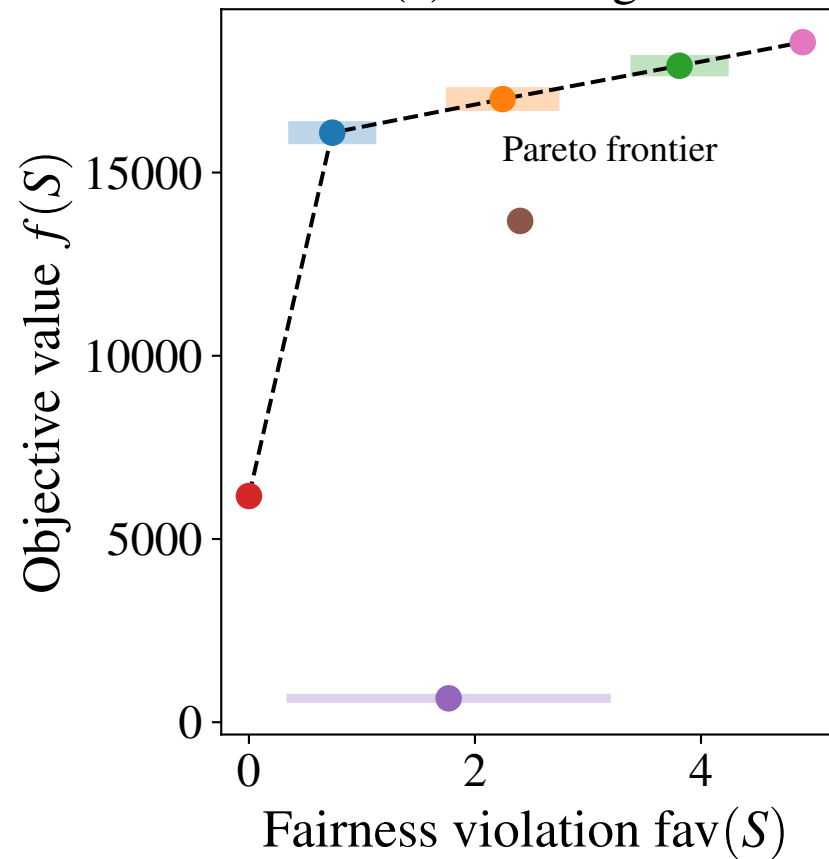

(b) Clustering

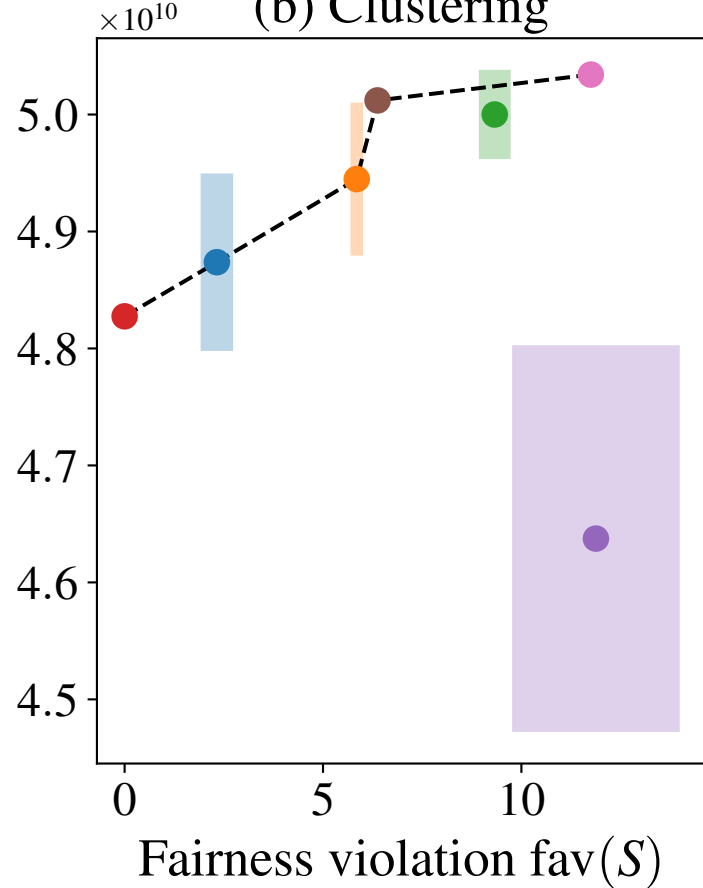

(c) Movies

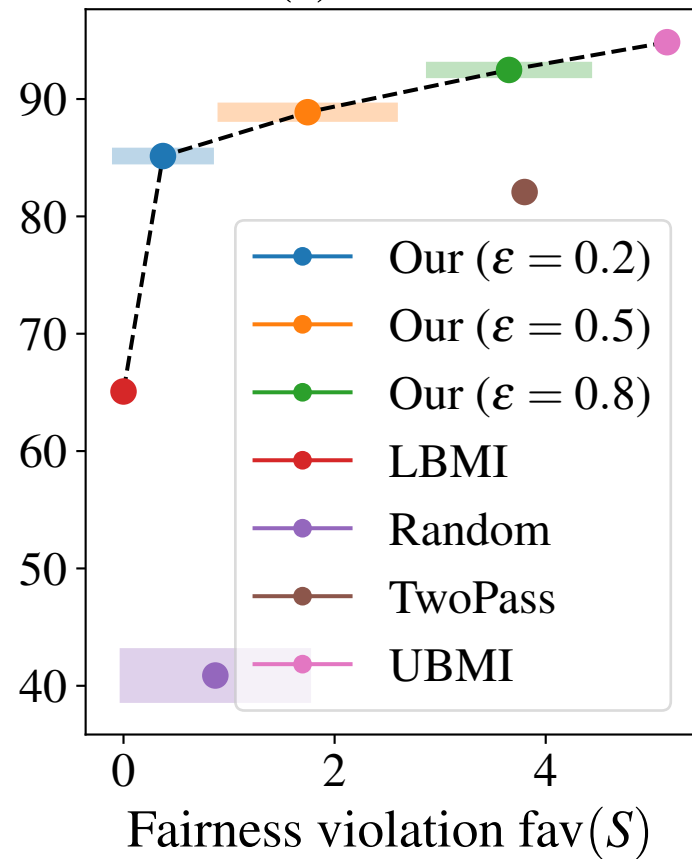

Supplement: supplementary_material [file scatter_grid.pdf › neurips/scatter_grid.pdf]

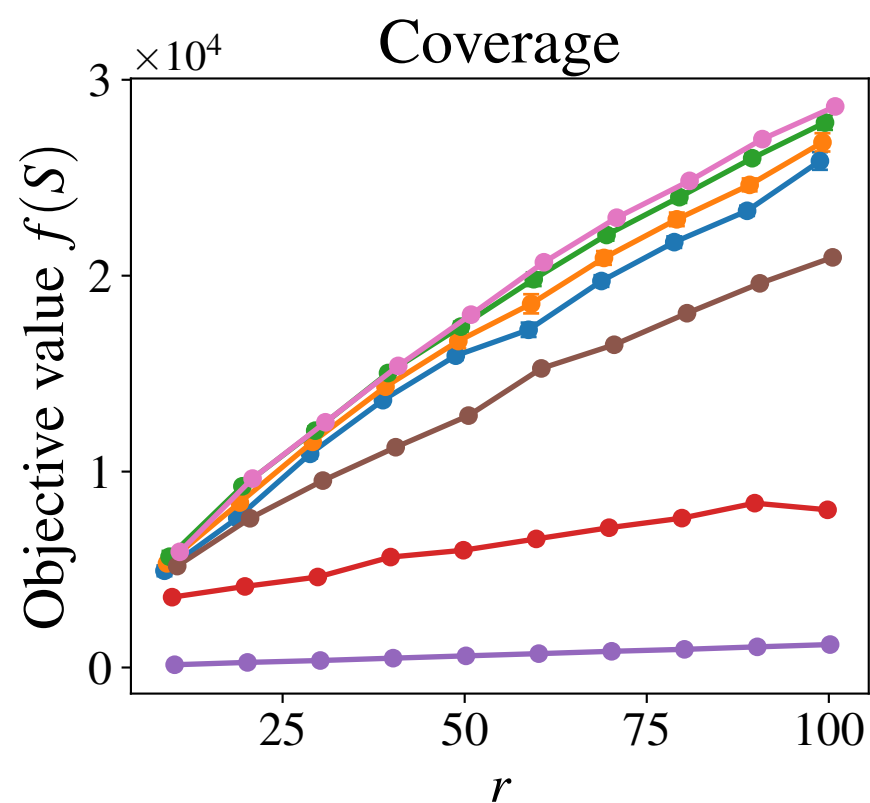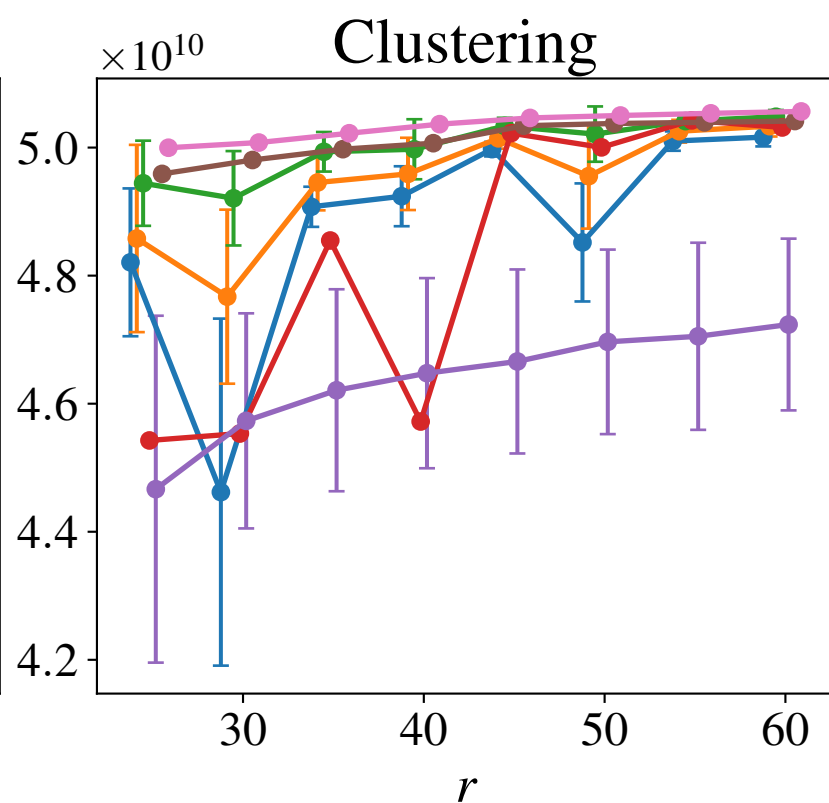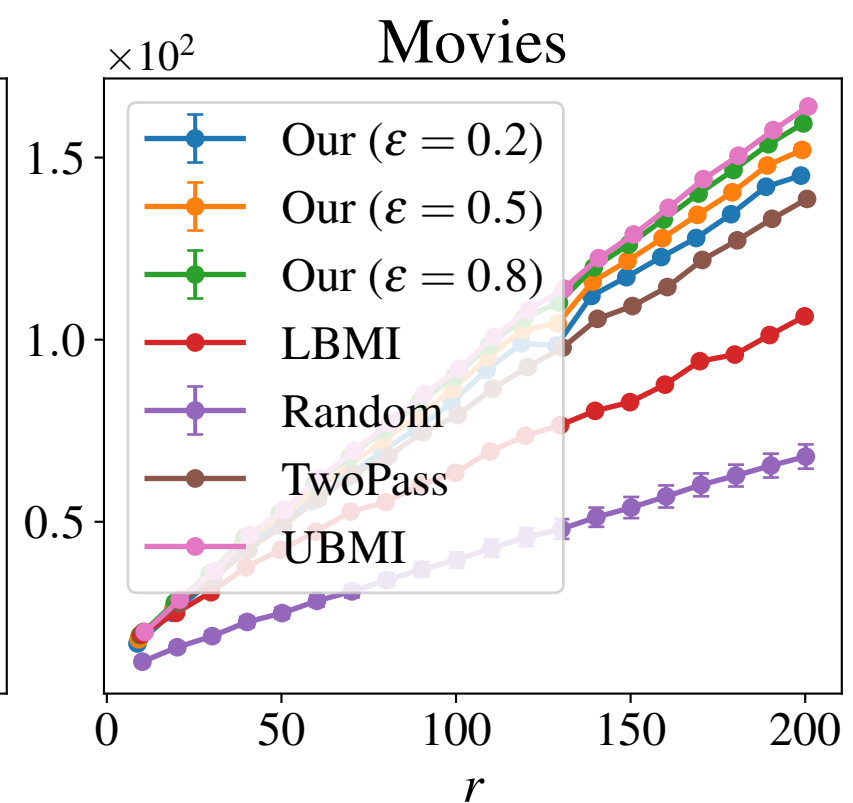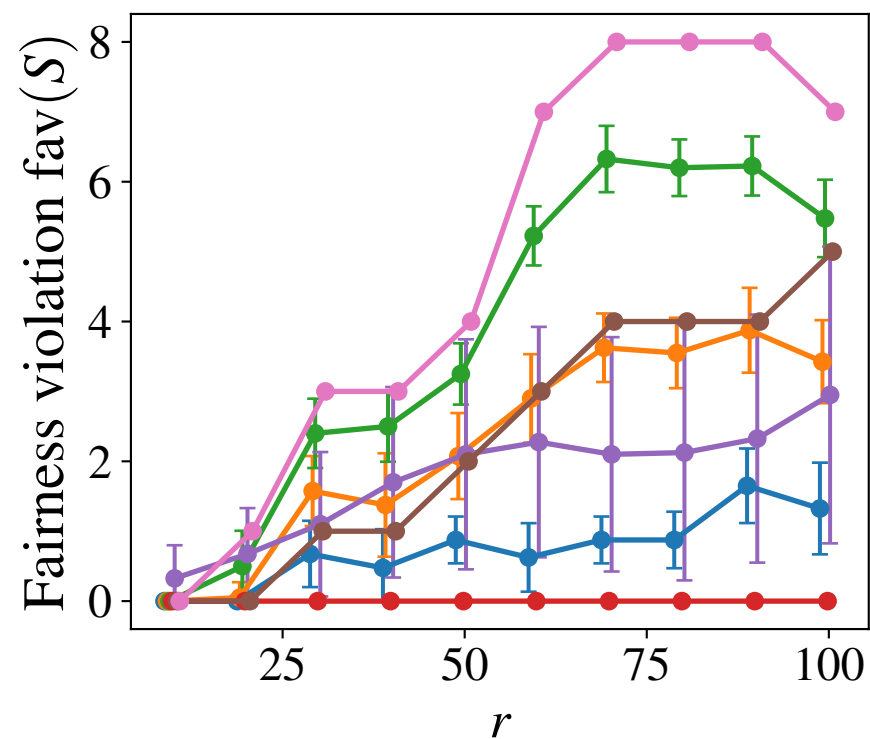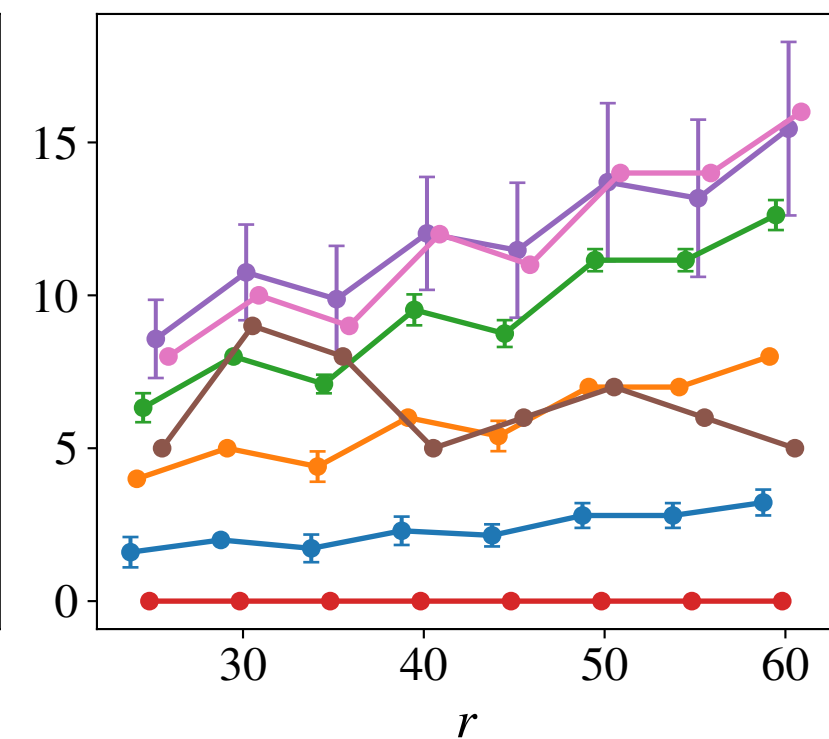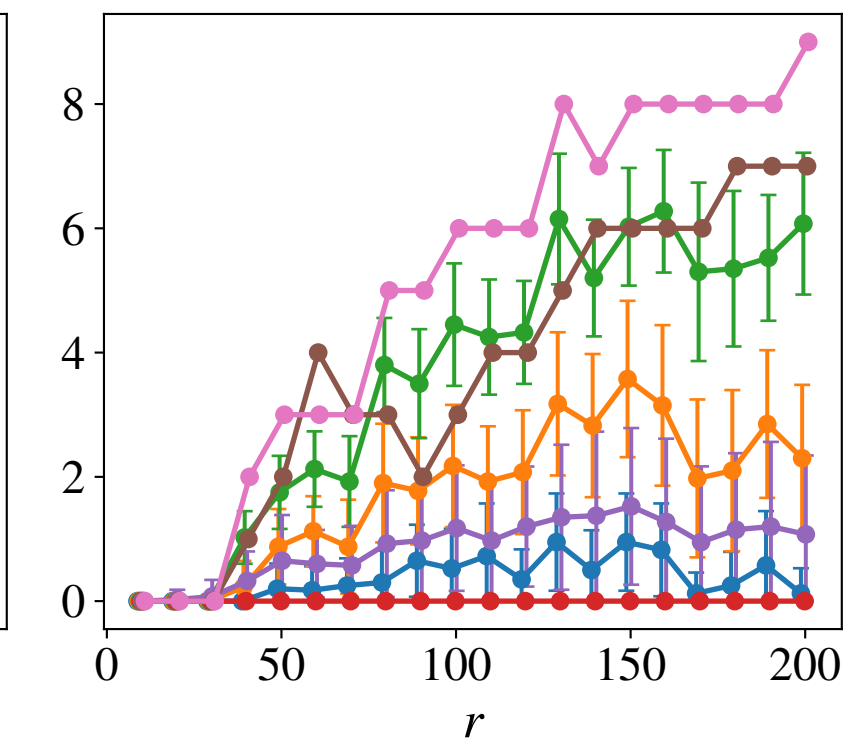

Supplement: supplementary_material [file small_plots_grid.pdf › neurips/small_plots_grid.pdf]

(a) Coverage



(b) Clustering



(c) Movies



Supplement: supplementary_material [file scatter_grid.pdf › supp-materials/code/plots/scatter_grid.pdf]

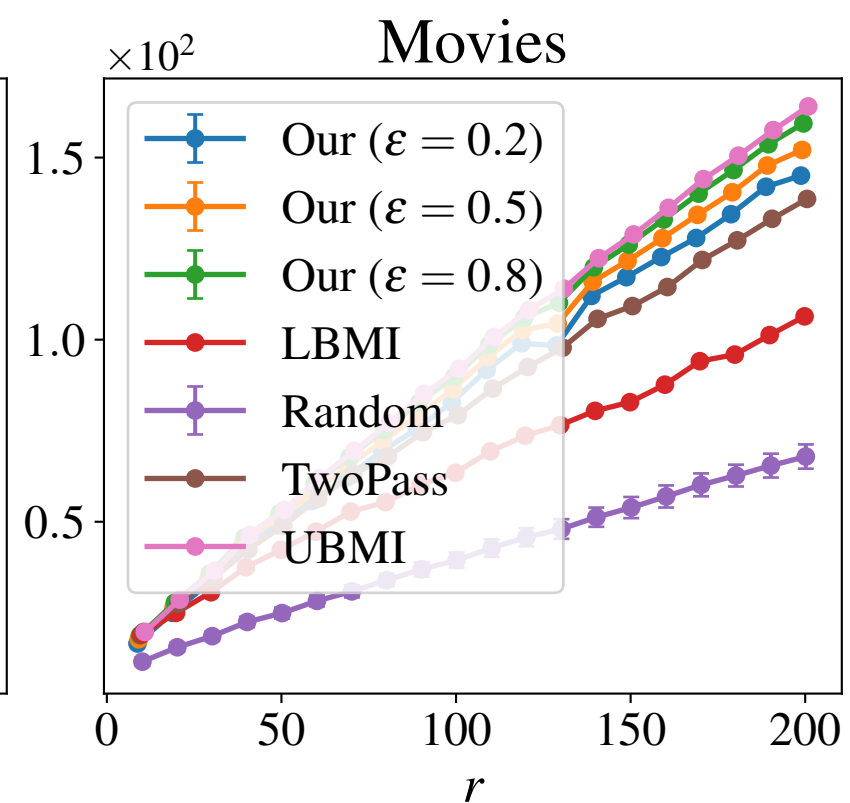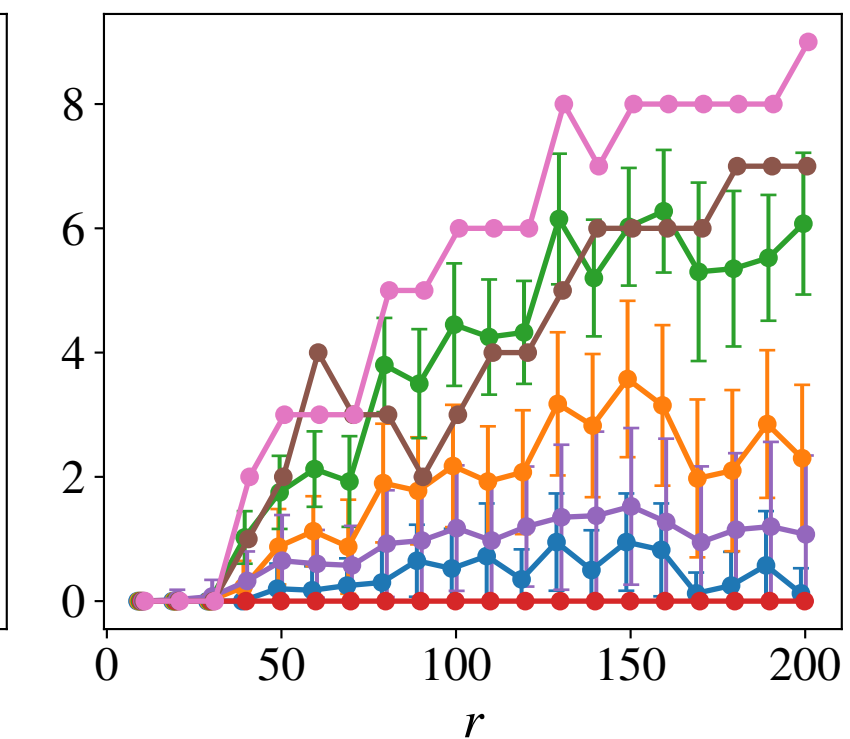

Supplement: supplementary_material [file small_plots_grid.pdf › supp-materials/code/plots/small_plots_grid.pdf]
